# Supplementary material for: MtTGA1 Transcription Factor Enhances Salt Tolerance through Hormonal Regulation and Antioxidant Enzyme Activity in <em>Medicago truncatula</em>
Source: Preprints.org preprint supplement (doi:10.20944/preprints202306.0691.v1), 2023-06-09
Supplement: Supplementary file 1 [file supplementary]

## Sheet: biomarker
#ID	gene_name	M1_FPKM	M1_count	M2_FPKM	M2_count	M3_FPKM	M3_count	M4_FPKM	M4_count	FDR	log2FC	regulated	COG_class	COG_class_annotation	GO_annotation	KEGG_annotation	KEGG_pathway_annotation	KOG_class	KOG_class_annotation	Pfam_annotation	Swiss_Prot_annotation	eggNOG_class	eggNOG_class_annotation	NR_annotation	GO_second_level_annotation
AT3G05770	AT3G05770	16.1485	920	14.73	747	6.97443	361	6.0669	359	0.000366671	-1.28971	down	--	--	Biological Process: pollen tube development (GO:0048868);;	--	--	--	--	--	--	S	Function unknown	hypothetical protein AT3G05770 [Arabidopsis thaliana]	biological process: reproduction (GO:0000003);; biological process: reproductive process (GO:0022414);; biological process: developmental process (GO:0032502)
NewGene_7	--	2.32337	210	2.64176	200	0	0	0	0	1.31e-07	-10.2087	down	--	--	Molecular Function: zinc ion binding (GO:0008270);;	K17604|1.26e-275|tcc:18600636|K17604 zinc finger SWIM domain-containing protein 3 | (RefSeq) uncharacterized LOC18600636	--	--	--	MuDR family transposase	--	S	Function unknown	putative mudrA protein [Arabidopsis thaliana]	molecular function: binding (GO:0005488)
AT1G12830	AT1G12830	5.87516	246	2.3565	89	0	0	0	0	3.64e-06	-9.87224	down	--	--	Cellular Component: mitochondrial respiratory chain complex III (GO:0005750);; Biological Process: mitochondrial electron transport, ubiquinol to cytochrome c (GO:0006122);; Biological Process: aerobic respiration (GO:0009060);;	--	--	--	--	--	--	S	Function unknown	nucleolin [Arabidopsis thaliana]	cellular component: intracellular (GO:0005622);; cellular component: protein-containing complex (GO:0032991);; cellular component: cellular anatomical entity (GO:0110165);; biological process: metabolic process (GO:0008152);; biological process: cellular process (GO:0009987)
AT1G10970	ZIP4	19.1732	1181	19.9243	1108	9.41929	596	8.38977	609	0.00503956	-1.01088	down	[P]	Inorganic ion transport and metabolism	Molecular Function: zinc ion transmembrane transporter activity (GO:0005385);; Cellular Component: integral component of membrane (GO:0016021);;	K14709|9.8e-190|ath:AT1G10970|K14709 solute carrier family 39 (zinc transporter), member 1/2/3 | (RefSeq) ZIP4; zinc transporter	--	[P]	Inorganic ion transport and metabolism	ZIP Zinc transporter	Zinc transporter 4, chloroplastic OS=Arabidopsis thaliana OX=3702 GN=ZIP4 PE=2 SV=1	P	Inorganic ion transport and metabolism	zinc transporter [Arabidopsis thaliana]	biological process: cellular process (GO:0009987);; biological process: localization (GO:0051179);; molecular function: transporter activity (GO:0005215);; cellular component: cellular anatomical entity (GO:0110165)
AT5G10625	FLP2	23.7724	1026	18.7634	728	11.536	462	8.4331	387	0.0118933	-1.12133	down	--	--	Biological Process: regulation of flower development (GO:0009909);;	--	--	--	--	--	Flowering-promoting factor 1-like protein 2 OS=Arabidopsis thaliana OX=3702 GN=FLP2 PE=2 SV=1	S	Function unknown	flowering-promoting factor-like protein [Arabidopsis thaliana]	biological process: biological regulation (GO:0065007)
AT3G63140	CSP41A	16.0682	1028	18.7318	1078	49.9477	2966	32.3031	2196	0.00258914	1.19757	up	[M]	Cell wall/membrane/envelope biogenesis	Molecular Function: catalytic activity (GO:0003824);;	--	--	--	--	NAD dependent epimerase/dehydratase family	Chloroplast stem-loop binding protein of 41 kDa a, chloroplastic OS=Arabidopsis thaliana OX=3702 GN=CSP41A PE=1 SV=1	S	Function unknown	chloroplast stem-loop binding protein of 41 kDa [Arabidopsis thaliana]	molecular function: catalytic activity (GO:0003824)
AT5G56550	OXS3	4.01883	166	4.04791	150	9.88064	377	8.64394	378	0.0388528	1.1731	up	--	--	--	--	--	[K]	Transcription	--	--	S	Function unknown	oxidative stress 3 [Arabidopsis thaliana]	--
AT3G21055	PSBTN	82.6418	2302	100.971	2328	194.129	5093	183.597	5356	0.000332772	1.0858	up	--	--	--	--	--	--	--	--	Photosystem II 5 kDa protein, chloroplastic OS=Arabidopsis thaliana OX=3702 GN=PSBT PE=3 SV=2	S	Function unknown	photosystem II subunit T [Arabidopsis thaliana]	--
AT4G02700	SULTR3%3B2	2.08946	202	3.02041	262	7.05265	632	6.17883	634	0.0169683	1.34758	up	[P]	Inorganic ion transport and metabolism	Molecular Function: secondary active sulfate transmembrane transporter activity (GO:0008271);; Cellular Component: integral component of membrane (GO:0016021);;	K17471|0.0e+00|ath:AT4G02700|K17471 sulfate transporter 3 | (RefSeq) SULTR3;2; sulfate transporter 3;2	--	[P]	Inorganic ion transport and metabolism	Sulfate permease family	Sulfate transporter 3.2 OS=Arabidopsis thaliana OX=3702 GN=SULTR3;2 PE=2 SV=1	P	Inorganic ion transport and metabolism	sulfate transporter 3;2 [Arabidopsis thaliana]	biological process: cellular process (GO:0009987);; biological process: localization (GO:0051179);; molecular function: transporter activity (GO:0005215);; cellular component: cellular anatomical entity (GO:0110165)
AT3G16250	PNSB3	1.16496	43	2.29086	75	10.4062	352	5.55469	215	0.0183768	2.14425	up	[C]	Energy production and conversion	Molecular Function: electron transfer activity (GO:0009055);; Molecular Function: iron-sulfur cluster binding (GO:0051536);;	--	--	--	--	2Fe-2S iron-sulfur cluster binding domain	Photosynthetic NDH subunit of subcomplex B 3, chloroplastic OS=Arabidopsis thaliana OX=3702 GN=PNSB3 PE=2 SV=1	C	Energy production and conversion	NDH-dependent cyclic electron flow 1 [Arabidopsis thaliana]	biological process: metabolic process (GO:0008152);; molecular function: catalytic activity (GO:0003824);; molecular function: binding (GO:0005488)
AT1G21500	AT1G21500	4.03424	149	8.60628	284	21.5792	735	19.4512	759	0.0293725	1.66867	up	--	--	--	--	--	--	--	--	--	S	Function unknown	hypothetical protein AT1G21500 [Arabidopsis thaliana]	--
AT5G28500	RAF1.1	17.9545	1374	19.2696	1326	39.7594	2824	29.4906	2398	0.0146218	0.862126	up	--	--	Cellular Component: cellular_component (GO:0005575);; Cellular Component: intracellular (GO:0005622);; Cellular Component: obsolete cell (GO:0005623);; Cellular Component: cytoplasm (GO:0005737);; Biological Process: biological_process (GO:0008150);; Cellular Component: chloroplast (GO:0009507);; Cellular Component: plastid stroma (GO:0009532);; Cellular Component: plastid (GO:0009536);; Cellular…	--	--	--	--	Rubisco Assembly chaperone C-terminal domain	Rubisco accumulation factor 1.1, chloroplastic OS=Arabidopsis thaliana OX=3702 GN=RAF1.1 PE=1 SV=1	S	Function unknown	rubisco accumulation factor-like protein [Arabidopsis thaliana]	cellular component: intracellular (GO:0005622);; cellular component: cellular anatomical entity (GO:0110165);; biological process: cellular process (GO:0009987)
AT2G36690	AT2G36690	1.21302	68	1.44751	70	7.5094	400	3.42731	202	0.0131473	2.02521	up	[Q]	Secondary metabolites biosynthesis, transport and catabolism	Biological Process: gibberellin metabolic process (GO:0009685);; Biological Process: gibberellin biosynthetic process (GO:0009686);; Biological Process: response to abscisic acid (GO:0009737);; Molecular Function: 2-oxoglutarate-dependent dioxygenase activity (GO:0016706);; Molecular Function: metal ion binding (GO:0046872);; Molecular Function: dioxygenase activity (GO:0051213);;	K24028|6.0e-75|gmx:100787979|K24028 salicylic acid 3-hydroxylase [EC:1.14.11.-] | (RefSeq) protein DMR6-LIKE OXYGENASE 2 isoform X1	--	[QR]	Secondary metabolites biosynthesis, transport and catabolism;; General function prediction only	2OG-Fe(II) oxygenase superfamily	Probable 2-oxoglutarate-dependent dioxygenase SLC1 OS=Oryza sativa subsp. japonica OX=39947 GN=SLC1 PE=2 SV=1	S	Function unknown	2-oxoglutarate (2OG) and Fe(II)-dependent oxygenase superfamily protein [Arabidopsis thaliana]	biological process: metabolic process (GO:0008152);; biological process: cellular process (GO:0009987);; biological process: response to stimulus (GO:0050896);; molecular function: catalytic activity (GO:0003824);; molecular function: binding (GO:0005488)
AT5G22860	AT5G22860	14.163	1407	9.61321	871	25.7417	2354	22.4034	2325	0.0388528	0.973118	up	--	--	Molecular Function: carboxypeptidase activity (GO:0004180);; Molecular Function: serine-type peptidase activity (GO:0008236);; Cellular Component: integral component of membrane (GO:0016021);;	K01285|2.0e-243|ath:AT5G22860|K01285 lysosomal Pro-X carboxypeptidase [EC:3.4.16.2] | (RefSeq) Serine carboxypeptidase S28 family protein	--	[OR]	Posttranslational modification, protein turnover, chaperones;; General function prediction only	Serine carboxypeptidase S28	Probable serine protease EDA2 OS=Arabidopsis thaliana OX=3702 GN=EDA2 PE=2 SV=2	S	Function unknown	Serine carboxypeptidase S28 family protein [Arabidopsis thaliana]	biological process: metabolic process (GO:0008152);; molecular function: catalytic activity (GO:0003824);; cellular component: cellular anatomical entity (GO:0110165)
AT3G61870	AT3G61870	30.7719	1649	30.864	1484	57.4648	2849	58.4456	3315	0.013866	0.895309	up	--	--	Cellular Component: integral component of membrane (GO:0016021);;	--	--	--	--	Protein of unknown function (DUF4079)	--	S	Function unknown	plant/protein [Arabidopsis thaliana]	cellular component: cellular anatomical entity (GO:0110165)
AT5G21430	ndhU	1.42549	61	1.35742	52	11.6152	456	4.22723	190	0.00479235	2.42114	up	--	--	Cellular Component: integral component of membrane (GO:0016021);;	K23052|1.8e-119|ath:AT5G21430|K23052 NAD(P)H-quinone oxidoreductase subunit U, chloroplastic [EC:1.6.5.-] | (RefSeq) NdhU; Chaperone DnaJ-domain superfamily protein	--	--	--	--	NAD(P)H-quinone oxidoreductase subunit U, chloroplastic OS=Arabidopsis thaliana OX=3702 GN=ndhU PE=1 SV=1	U	Intracellular trafficking, secretion, and vesicular transport	Chaperone DnaJ-domain superfamily protein [Arabidopsis thaliana]	cellular component: cellular anatomical entity (GO:0110165)
AT3G62030	ROC4	95.441	4648	110.883	4854	201.313	9099	194.027	10037	0.00796323	0.920585	up	[O]	Posttranslational modification, protein turnover, chaperones	Biological Process: protein peptidyl-prolyl isomerization (GO:0000413);; Molecular Function: peptidyl-prolyl cis-trans isomerase activity (GO:0003755);; Cellular Component: cytosol (GO:0005829);; Biological Process: protein folding (GO:0006457);; Biological Process: response to oxidative stress (GO:0006979);; Biological Process: signal transduction (GO:0007165);; Cellular Component: chloroplast (…	K03768|7.2e-146|ath:AT3G62030|K03768 peptidyl-prolyl cis-trans isomerase B (cyclophilin B) [EC:5.2.1.8] | (RefSeq) ROC4; rotamase CYP 4	--	[O]	Posttranslational modification, protein turnover, chaperones	Cyclophilin type peptidyl-prolyl cis-trans isomerase/CLD	Peptidyl-prolyl cis-trans isomerase CYP20-3, chloroplastic OS=Arabidopsis thaliana OX=3702 GN=CYP20-3 PE=1 SV=1	O	Posttranslational modification, protein turnover, chaperones	rotamase CYP 4 [Arabidopsis thaliana]	biological process: metabolic process (GO:0008152);; biological process: cellular process (GO:0009987);; molecular function: catalytic activity (GO:0003824);; cellular component: cellular anatomical entity (GO:0110165);; biological process: response to stimulus (GO:0050896);; biological process: biological regulation (GO:0065007);; cellular component: intracellular (GO:0005622);; biological proce…
AT4G13500	AT4G13500	3.6937	102	5.48417	136	18.9591	484	12.6373	369	0.00555129	1.73609	up	--	--	Cellular Component: cytosol (GO:0005829);; Cellular Component: chloroplast (GO:0009507);; Cellular Component: chloroplast thylakoid (GO:0009534);; Cellular Component: integral component of membrane (GO:0016021);;	--	--	--	--	--	--	S	Function unknown	transmembrane protein [Arabidopsis thaliana]	cellular component: cellular anatomical entity (GO:0110165);; cellular component: intracellular (GO:0005622)
AT4G24770	CP31A	66.3207	4826	72.1355	4718	140.725	9502	119.438	9231	0.00208551	0.8848	up	[J]	Translation, ribosomal structure and biogenesis	Molecular Function: RNA binding (GO:0003723);;	K11294|2.7e-135|csat:104730967|K11294 nucleolin | (RefSeq) 31 kDa ribonucleoprotein, chloroplastic	--	[R]	General function prediction only	RNA recognition motif. (a.k.a. RRM, RBD, or RNP domain)	31 kDa ribonucleoprotein, chloroplastic OS=Arabidopsis thaliana OX=3702 GN=CP31A PE=1 SV=1	S	Function unknown	31-kDa RNA binding protein [Arabidopsis thaliana]	molecular function: binding (GO:0005488)
AT3G28270	AT3G28270	3.89511	321	3.57281	264	42.4605	2688	20.2797	1461	3.16e-10	2.73758	up	--	--	Cellular Component: integral component of membrane (GO:0016021);;	--	--	--	--	Protein of unknown function (DUF677)	UPF0496 protein At3g28270 OS=Arabidopsis thaliana OX=3702 GN=At3g28270 PE=2 SV=1	--	--	transmembrane protein, putative (DUF677) [Arabidopsis thaliana]	cellular component: cellular anatomical entity (GO:0110165)
AT2G24280	AT2G24280	8.17555	1327	9.08598	1328	19.6553	2967	13.1174	2262	0.0408629	0.884737	up	--	--	Cellular Component: vacuole (GO:0005773);; Biological Process: proteolysis (GO:0006508);; Molecular Function: serine-type peptidase activity (GO:0008236);; Molecular Function: dipeptidyl-peptidase activity (GO:0008239);;	K01285|3.6e-260|ath:AT2G24280|K01285 lysosomal Pro-X carboxypeptidase [EC:3.4.16.2] | (RefSeq) alpha/beta-Hydrolases superfamily protein	--	[OR]	Posttranslational modification, protein turnover, chaperones;; General function prediction only	Serine carboxypeptidase S28	Probable serine protease EDA2 OS=Arabidopsis thaliana OX=3702 GN=EDA2 PE=2 SV=2	S	Function unknown	alpha/beta-Hydrolases superfamily protein [Arabidopsis thaliana]	cellular component: intracellular (GO:0005622);; cellular component: cellular anatomical entity (GO:0110165);; biological process: metabolic process (GO:0008152);; molecular function: catalytic activity (GO:0003824)
AT3G21670	NPF6.4	14.8887	1376	13.4102	1114	25.7321	2207	25.4866	2503	0.028605	0.843372	up	[E]	Amino acid transport and metabolism	Cellular Component: integral component of membrane (GO:0016021);; Molecular Function: transmembrane transporter activity (GO:0022857);;	K14638|5.2e-129|aof:109835602|K14638 solute carrier family 15 (peptide/histidine transporter), member 3/4 | (RefSeq) protein NRT1/ PTR FAMILY 6.4	--	[E]	Amino acid transport and metabolism	POT family	Protein NRT1/ PTR FAMILY 6.4 OS=Arabidopsis thaliana OX=3702 GN=NPF6.4 PE=1 SV=1	E	Amino acid transport and metabolism	Major facilitator superfamily protein [Arabidopsis thaliana]	cellular component: cellular anatomical entity (GO:0110165);; molecular function: transporter activity (GO:0005215)
AT1G76530	PILS4	0.233525	15	0.277774	16	3.09662	167	1.48956	95	0.00319223	2.98118	up	--	--	Cellular Component: integral component of membrane (GO:0016021);; Biological Process: transmembrane transport (GO:0055085);;	K24139|4.1e-229|ath:AT1G76530|K24139 auxin efflux carrier family protein | (RefSeq) Auxin efflux carrier family protein	--	[S]	Function unknown	Membrane transport protein	Protein PIN-LIKES 4 OS=Arabidopsis thaliana OX=3702 GN=PILS4 PE=2 SV=1	S	Function unknown	Auxin efflux carrier family protein [Arabidopsis thaliana]	cellular component: cellular anatomical entity (GO:0110165);; biological process: cellular process (GO:0009987);; biological process: localization (GO:0051179)
AT2G01520	MLP328	9.33068	350	8.92358	301	22.3796	778	17.0643	679	0.0104398	1.0789	up	--	--	Biological Process: defense response (GO:0006952);;	--	--	--	--	Pathogenesis-related protein Bet v 1 family	MLP-like protein 328 OS=Arabidopsis thaliana OX=3702 GN=MLP328 PE=2 SV=1	S	Function unknown	MLP-like protein 328 [Arabidopsis thaliana]	biological process: response to stimulus (GO:0050896)
AT3G63160	AT3G63160	27.2428	725	23.3866	560	89.0031	2198	69.7278	1971	5.98e-09	1.62008	up	--	--	Cellular Component: cytosol (GO:0005829);; Cellular Component: chloroplast (GO:0009507);; Cellular Component: chloroplast thylakoid membrane (GO:0009535);; Cellular Component: thylakoid (GO:0009579);; Cellular Component: chloroplast outer membrane (GO:0009707);; Cellular Component: chloroplast envelope (GO:0009941);; Cellular Component: integral component of chloroplast outer membrane (GO:0031359…	--	--	--	--	--	Outer envelope membrane protein 7 OS=Arabidopsis thaliana OX=3702 GN=OEP7 PE=1 SV=1	S	Function unknown	outer envelope membrane protein [Arabidopsis thaliana]	cellular component: cellular anatomical entity (GO:0110165);; cellular component: intracellular (GO:0005622)
AT1G18810	PKS3	0.534414	37	0.659649	41	2.03035	130	2.52836	185	0.0496895	1.92714	up	--	--	Biological Process: phototropism (GO:0009638);;	--	--	--	--	--	Protein PHYTOCHROME KINASE SUBSTRATE 3 OS=Arabidopsis thaliana OX=3702 GN=PKS3 PE=2 SV=2	S	Function unknown	phytochrome kinase substrate-like protein [Arabidopsis thaliana]	biological process: response to stimulus (GO:0050896)
AT5G05580	FAD8	9.18729	677	9.6306	638	20.8663	1427	15.9415	1248	0.0118933	0.93673	up	[I]	Lipid transport and metabolism	Biological Process: lipid metabolic process (GO:0006629);; Cellular Component: integral component of membrane (GO:0016021);; Molecular Function: oxidoreductase activity, acting on paired donors, with oxidation of a pair of donors resulting in the reduction of molecular oxygen to two molecules of water (GO:0016717);;	K10257|1.0e-234|ath:AT5G05580|K10257 acyl-lipid omega-3 desaturase [EC:1.14.19.25 1.14.19.35 1.14.19.36] | (RefSeq) FAD8; fatty acid desaturase 8	--	--	--	Domain of unknown function (DUF3474)	Temperature-sensitive sn-2 acyl-lipid omega-3 desaturase (ferredoxin), chloroplastic OS=Arabidopsis thaliana OX=3702 GN=FAD8 PE=1 SV=1	I	Lipid transport and metabolism	fatty acid desaturase 8 [Arabidopsis thaliana]	biological process: metabolic process (GO:0008152);; cellular component: cellular anatomical entity (GO:0110165);; molecular function: catalytic activity (GO:0003824)
AT1G62540	FMO GS-OX2	3.93291	307	2.97324	212	29.1527	2095	5.73826	477	0.0412183	2.21814	up	[P]	Inorganic ion transport and metabolism	Molecular Function: N,N-dimethylaniline monooxygenase activity (GO:0004499);; Molecular Function: flavin adenine dinucleotide binding (GO:0050660);; Molecular Function: NADP binding (GO:0050661);;	K22324|1.0e-268|ath:AT1G62540|K22324 aliphatic glucosinolate S-oxygenase [EC:1.14.13.237] | (RefSeq) FMO_GS-OX2; flavin-monooxygenase glucosinolate S-oxygenase 2	--	[Q]	Secondary metabolites biosynthesis, transport and catabolism	Flavin-binding monooxygenase-like	Flavin-containing monooxygenase FMO GS-OX2 OS=Arabidopsis thaliana OX=3702 GN=FMOGS-OX2 PE=1 SV=1	P	Inorganic ion transport and metabolism	flavin-monooxygenase glucosinolate S-oxygenase 2 [Arabidopsis thaliana]	biological process: metabolic process (GO:0008152);; molecular function: catalytic activity (GO:0003824);; molecular function: binding (GO:0005488)
AT1G62780	AT1G62780	13.0094	570	11.8406	467	28.3855	1154	19.9263	928	0.0388528	0.923207	up	--	--	Cellular Component: nucleus (GO:0005634);; Cellular Component: chloroplast (GO:0009507);; Cellular Component: chloroplast stroma (GO:0009570);; Molecular Function: transferase activity (GO:0016740);;	--	--	--	--	--	--	S	Function unknown	dimethylallyl, adenosine tRNA methylthiotransferase [Arabidopsis thaliana]	cellular component: intracellular (GO:0005622);; cellular component: cellular anatomical entity (GO:0110165);; molecular function: catalytic activity (GO:0003824)
AT2G10940	AT2G10940	3.75918	239	3.28571	186	71.9514	4175	16.495	1095	1.09e-06	3.53682	up	--	--	Cellular Component: mitochondrion (GO:0005739);; Cellular Component: plasmodesma (GO:0009506);; Cellular Component: chloroplast (GO:0009507);; Cellular Component: chloroplast thylakoid membrane (GO:0009535);; Cellular Component: apoplast (GO:0048046);; Cellular Component: secretory vesicle (GO:0099503);;	--	--	--	--	Hydrophobic seed protein	36.4 kDa proline-rich protein OS=Solanum lycopersicum OX=4081 GN=TPRP-F1 PE=2 SV=1	U	Intracellular trafficking, secretion, and vesicular transport	Bifunctional inhibitor/lipid-transfer protein/seed storage 2S albumin superfamily protein [Arabidopsis thaliana]	cellular component: intracellular (GO:0005622);; cellular component: cellular anatomical entity (GO:0110165)
AT3G46780	PTAC16	15.3649	1199	18.7986	1319	55.5844	4025	33.9836	2817	0.00109345	1.34293	up	[R]	General function prediction only	Cellular Component: cytoplasmic chromosome (GO:0000229);; Cellular Component: cellular_component (GO:0005575);; Cellular Component: intracellular (GO:0005622);; Cellular Component: obsolete cell (GO:0005623);; Cellular Component: chromosome (GO:0005694);; Cellular Component: cytoplasm (GO:0005737);; Biological Process: circadian rhythm (GO:0007623);; Biological Process: biological_process (GO:000…	--	--	[G]	Carbohydrate transport and metabolism	NAD(P)H-binding	Protein PLASTID TRANSCRIPTIONALLY ACTIVE 16, chloroplastic OS=Arabidopsis thaliana OX=3702 GN=PTAC16 PE=1 SV=1	GM	Carbohydrate transport and metabolism;; Cell wall/membrane/envelope biogenesis	plastid transcriptionally active 16 [Arabidopsis thaliana]	cellular component: intracellular (GO:0005622);; cellular component: cellular anatomical entity (GO:0110165);; biological process: rhythmic process (GO:0048511)
AT5G52970	AT5G52970	5.7263	276	8.8752	384	19.8156	884	15.8533	809	0.0381471	1.25335	up	[S]	Function unknown	Cellular Component: cellular_component (GO:0005575);; Cellular Component: intracellular (GO:0005622);; Cellular Component: obsolete cell (GO:0005623);; Cellular Component: cytoplasm (GO:0005737);; Cellular Component: chloroplast (GO:0009507);; Cellular Component: plastid (GO:0009536);; Cellular Component: thylakoid (GO:0009579);; Cellular Component: thylakoid lumen (GO:0031977);; Cellular Compone…	--	--	--	--	--	Thylakoid lumenal 15.0 kDa protein 2, chloroplastic OS=Arabidopsis thaliana OX=3702 GN=At5g52970 PE=1 SV=2	S	Function unknown	thylakoid lumen 15.0 kDa protein [Arabidopsis thaliana]	cellular component: intracellular (GO:0005622);; cellular component: cellular anatomical entity (GO:0110165)
AT3G28290	AT14A	0.497467	35	0.243977	16	14.1032	916	0.831771	62	0.00835944	4.17972	up	--	--	Cellular Component: integral component of membrane (GO:0016021);;	--	--	--	--	Protein of unknown function (DUF677)	UPF0496 protein At3g28290 OS=Arabidopsis thaliana OX=3702 GN=At3g28290 PE=2 SV=1	--	--	transmembrane protein, putative (DUF677) [Arabidopsis thaliana]	cellular component: cellular anatomical entity (GO:0110165)
AT2G04039	AT2G04039	11.1789	489	12.3835	485	27.6323	1120	19.2186	894	0.0412183	0.956431	up	--	--	--	--	--	--	--	Protein of unknown function (DUF2996)	--	S	Function unknown	DUF2996 family protein [Arabidopsis thaliana]	--
AT2G38140	RPS31	61.8624	1579	67.2904	1544	120.217	2848	108.293	2936	0.0233154	0.802067	up	--	--	Cellular Component: ribosome (GO:0005840);;	K19033|1.1e-57|ath:AT2G38140|K19033 30S ribosomal protein S31 | (RefSeq) PSRP4; plastid-specific ribosomal protein 4	--	--	--	Ribosomal protein S31e	30S ribosomal protein S31, chloroplastic OS=Arabidopsis thaliana OX=3702 GN=RPS31 PE=1 SV=1	S	Function unknown	plastid-specific ribosomal protein 4 [Arabidopsis thaliana]	cellular component: intracellular (GO:0005622);; cellular component: cellular anatomical entity (GO:0110165)
AT1G19210	ERF017	0.516441	20	0.348916	12	11.1603	388	1.27669	51	0.0198969	3.6874	up	--	--	Molecular Function: DNA binding (GO:0003677);; Molecular Function: DNA-binding transcription factor activity (GO:0003700);; Cellular Component: nucleus (GO:0005634);;	K09286|4.3e-21|ppp:112289375|K09286 EREBP-like factor | (RefSeq) ethylene-responsive transcription factor TINY-like	--	--	--	AP2 domain	Ethylene-responsive transcription factor ERF017 OS=Arabidopsis thaliana OX=3702 GN=ERF017 PE=2 SV=1	K	Transcription	Integrase-type DNA-binding superfamily protein [Arabidopsis thaliana]	molecular function: binding (GO:0005488);; molecular function: transcription regulator activity (GO:0140110);; cellular component: intracellular (GO:0005622);; cellular component: cellular anatomical entity (GO:0110165)
AT5G15780	AT5G15780	17.1744	1176	20.3286	1251	55.6304	3534	31.7181	2307	0.0146218	1.1684	up	--	--	Cellular Component: integral component of membrane (GO:0016021);;	--	--	--	--	Pollen protein Ole e 1 like	--	S	Function unknown	Pollen Ole e 1 allergen and extensin family protein [Arabidopsis thaliana]	cellular component: cellular anatomical entity (GO:0110165)
AT3G27160	GHS1	51.35	2288	52.8962	2118	95.6149	3954	87.8725	4160	0.0137713	0.796902	up	--	--	Molecular Function: structural constituent of ribosome (GO:0003735);; Cellular Component: ribosome (GO:0005840);; Biological Process: translation (GO:0006412);;	--	--	--	--	Ribosomal protein S21	30S ribosomal protein S21, chloroplastic OS=Spinacia oleracea OX=3562 GN=rps21 PE=1 SV=2	S	Function unknown	Ribosomal protein S21 family protein [Arabidopsis thaliana]	molecular function: structural molecule activity (GO:0005198);; cellular component: intracellular (GO:0005622);; cellular component: cellular anatomical entity (GO:0110165);; biological process: metabolic process (GO:0008152);; biological process: cellular process (GO:0009987)
AT1G55480	ZKT	24.9026	1658	24.6166	1473	48.5981	3003	38.6273	2732	0.0131473	0.788849	up	--	--	--	--	--	--	--	--	Protein MET1, chloroplastic OS=Arabidopsis thaliana OX=3702 GN=MET1 PE=1 SV=1	S	Function unknown	protein containing PDZ domain, a K-box domain, and a TPR region [Arabidopsis thaliana]	--
AT2G42220	STR9	21.5957	874	26.816	976	63.199	2373	40.5077	1741	0.0272999	1.05392	up	--	--	Cellular Component: cellular_component (GO:0005575);; Cellular Component: intracellular (GO:0005622);; Cellular Component: obsolete cell (GO:0005623);; Cellular Component: cytoplasm (GO:0005737);; Cellular Component: chloroplast (GO:0009507);; Cellular Component: chloroplast thylakoid (GO:0009534);; Cellular Component: chloroplast thylakoid membrane (GO:0009535);; Cellular Component: plastid (GO:…	--	--	--	--	Rhodanese-like domain	Rhodanese-like domain-containing protein 9, chloroplastic OS=Arabidopsis thaliana OX=3702 GN=STR9 PE=2 SV=1	S	Function unknown	Rhodanese/Cell cycle control phosphatase superfamily protein [Arabidopsis thaliana]	cellular component: intracellular (GO:0005622);; cellular component: cellular anatomical entity (GO:0110165)
AT1G15980	PNSB1	3.97498	286	6.52758	422	18.5249	1237	13.45	1028	0.0043769	1.56755	up	[M]	Cell wall/membrane/envelope biogenesis	Cellular Component: cellular_component (GO:0005575);; Cellular Component: intracellular (GO:0005622);; Cellular Component: obsolete cell (GO:0005623);; Cellular Component: cytoplasm (GO:0005737);; Biological Process: generation of precursor metabolites and energy (GO:0006091);; Biological Process: biological_process (GO:0008150);; Biological Process: metabolic process (GO:0008152);; Cellular Comp…	--	--	--	--	--	Photosynthetic NDH subunit of subcomplex B 1, chloroplastic OS=Arabidopsis thaliana OX=3702 GN=PNSB1 PE=2 SV=1	M	Cell wall/membrane/envelope biogenesis	NDH-dependent cyclic electron flow 1 [Arabidopsis thaliana]	cellular component: intracellular (GO:0005622);; cellular component: cellular anatomical entity (GO:0110165);; biological process: metabolic process (GO:0008152);; biological process: cellular process (GO:0009987);; cellular component: protein-containing complex (GO:0032991)
AT3G59400	GUN4	13.6024	738	12.4807	609	47.4619	2389	26.4925	1526	0.000799212	1.45296	up	[T]	Signal transduction mechanisms	Molecular Function: molecular_function (GO:0003674);; Molecular Function: binding (GO:0005488);; Molecular Function: protein binding (GO:0005515);; Cellular Component: cellular_component (GO:0005575);; Cellular Component: intracellular (GO:0005622);; Cellular Component: obsolete cell (GO:0005623);; Cellular Component: cytoplasm (GO:0005737);; Biological Process: cellular aromatic compound metabol…	--	--	--	--	GUN4-like	Tetrapyrrole-binding protein, chloroplastic OS=Arabidopsis thaliana OX=3702 GN=GUN4 PE=1 SV=1	S	Function unknown	protein GENOMES UNCOUPLED 4 [Arabidopsis thaliana]	molecular function: binding (GO:0005488);; cellular component: intracellular (GO:0005622);; cellular component: cellular anatomical entity (GO:0110165);; biological process: metabolic process (GO:0008152);; biological process: cellular process (GO:0009987);; biological process: biological regulation (GO:0065007);; biological process: signaling (GO:0023052);; biological process: response to stimul…
AT3G26280	CYP71B4	1.61535	122	1.53697	99	4.72054	333	4.02368	323	0.00643618	1.49043	up	[QV]	Secondary metabolites biosynthesis, transport and catabolism;; Defense mechanisms	Molecular Function: monooxygenase activity (GO:0004497);; Molecular Function: iron ion binding (GO:0005506);; Cellular Component: integral component of membrane (GO:0016021);; Molecular Function: oxidoreductase activity, acting on paired donors, with incorporation or reduction of molecular oxygen (GO:0016705);; Molecular Function: heme binding (GO:0020037);;	K20617|1.1e-151|eus:EUTSA_v10010307mg|K20617 cytochrome P450 family 71 subfamily A | (RefSeq) hypothetical protein	--	[Q]	Secondary metabolites biosynthesis, transport and catabolism	Cytochrome P450	Cytochrome P450 71B4 OS=Arabidopsis thaliana OX=3702 GN=CYP71B4 PE=2 SV=2	Q	Secondary metabolites biosynthesis, transport and catabolism	cytochrome P450, family 71, subfamily B, polypeptide 4 [Arabidopsis thaliana]	biological process: metabolic process (GO:0008152);; molecular function: catalytic activity (GO:0003824);; molecular function: binding (GO:0005488);; cellular component: cellular anatomical entity (GO:0110165)
AT4G16983	AT4G16983	0	0	0	0	3.73702	113	8.62828	299	2.08e-06	10.0583	up	--	--	--	--	--	--	--	--	--	--	--	hypothetical protein AT4G16983 [Arabidopsis thaliana]	--
AT1G74880	ndhO	6.25278	214	7.90395	244	25.5562	812	14.5638	530	0.013866	1.44961	up	--	--	Cellular Component: plasma membrane (GO:0005886);; Molecular Function: oxidoreductase activity, acting on NAD(P)H, quinone or similar compound as acceptor (GO:0016655);;	K17065|2.2e-34|smo:SELMODRAFT_437242|K17065 dynamin 1-like protein [EC:3.6.5.5] | (RefSeq) hypothetical protein	--	--	--	Cyanobacterial and plant NDH-1 subunit O	NAD(P)H-quinone oxidoreductase subunit O, chloroplastic OS=Arabidopsis thaliana OX=3702 GN=ndhO PE=2 SV=1	S	Function unknown	NAD(P)H:plastoquinone dehydrogenase complex subunit O [Arabidopsis thaliana]	cellular component: cellular anatomical entity (GO:0110165);; biological process: metabolic process (GO:0008152);; molecular function: catalytic activity (GO:0003824)
AT1G73530	ORRM6	10.6669	392	9.63939	318	22.0759	752	17.4662	681	0.0436456	0.933077	up	[J]	Translation, ribosomal structure and biogenesis	Molecular Function: RNA binding (GO:0003723);;	K13195|4.5e-31|pop:7485193|K13195 cold-inducible RNA-binding protein | (RefSeq) organelle RRM domain-containing protein 6, chloroplastic isoform X1	--	[R]	General function prediction only	RNA recognition motif. (a.k.a. RRM, RBD, or RNP domain)	Organelle RRM domain-containing protein 6, chloroplastic OS=Arabidopsis thaliana OX=3702 GN=ORRM6 PE=1 SV=1	S	Function unknown	RNA-binding (RRM/RBD/RNP motifs) family protein [Arabidopsis thaliana]	molecular function: binding (GO:0005488)
AT2G06520	PSBX	258.259	7780	238.258	6451	461.922	12913	394.163	12613	0.00555129	0.763209	up	--	--	Cellular Component: photosystem II (GO:0009523);; Cellular Component: chloroplast thylakoid membrane (GO:0009535);; Biological Process: photosynthesis (GO:0015979);; Cellular Component: integral component of membrane (GO:0016021);; Molecular Function: protein domain specific binding (GO:0019904);;	K22048|1.4e-25|csv:101209209|K22048 mechanosensitive ion channel protein 4/5/6/7/8/9/10 | (RefSeq) mechanosensitive ion channel protein 10	--	--	--	Photosystem II reaction centre X protein (PsbX)	--	S	Function unknown	photosystem II subunit X [Arabidopsis thaliana]	cellular component: intracellular (GO:0005622);; cellular component: protein-containing complex (GO:0032991);; cellular component: cellular anatomical entity (GO:0110165);; biological process: metabolic process (GO:0008152);; biological process: cellular process (GO:0009987);; molecular function: binding (GO:0005488)
AT5G55220	TIG	14.5021	1239	14.7804	1135	34.6152	2745	25.0741	2276	0.00258914	0.993345	up	[O]	Posttranslational modification, protein turnover, chaperones	Molecular Function: peptidyl-prolyl cis-trans isomerase activity (GO:0003755);; Biological Process: protein folding (GO:0006457);; Biological Process: protein transport (GO:0015031);;	K03545|1.3e-304|ath:AT5G55220|K03545 trigger factor | (RefSeq) trigger factor type chaperone family protein	--	--	--	Bacterial trigger factor protein (TF) C-terminus	Trigger factor-like protein TIG, Chloroplastic OS=Arabidopsis thaliana OX=3702 GN=TIG PE=1 SV=1	O	Posttranslational modification, protein turnover, chaperones	trigger factor type chaperone family protein [Arabidopsis thaliana]	molecular function: catalytic activity (GO:0003824);; biological process: cellular process (GO:0009987);; biological process: localization (GO:0051179)
AT4G01080	TBL26	0.435649	31	0.543168	35	3.23292	211	1.42878	107	0.0474074	2.16516	up	--	--	Cellular Component: integral component of membrane (GO:0016021);; Molecular Function: transferase activity (GO:0016740);;	K23877|2.1e-90|psom:113319599|K23877 xyloglucan O-acetyltransferase | (RefSeq) protein ALTERED XYLOGLUCAN 4-like isoform X1	--	--	--	GDSL/SGNH-like Acyl-Esterase family found in Pmr5 and Cas1p	Protein trichome birefringence-like 26 OS=Arabidopsis thaliana OX=3702 GN=TBL26 PE=2 SV=1	S	Function unknown	TRICHOME BIREFRINGENCE-LIKE 26 [Arabidopsis thaliana]	cellular component: cellular anatomical entity (GO:0110165);; molecular function: catalytic activity (GO:0003824)
AT5G43750	PNSB5	6.01153	253	8.23317	311	26.9423	1049	16.1714	721	0.00419633	1.54572	up	--	--	Biological Process: response to oxidative stress (GO:0006979);; Cellular Component: chloroplast (GO:0009507);; Cellular Component: integral component of membrane (GO:0016021);;	--	--	--	--	--	Photosynthetic NDH subunit of subcomplex B 5, chloroplastic OS=Arabidopsis thaliana OX=3702 GN=PNSB5 PE=2 SV=1	S	Function unknown	NAD(P)H dehydrogenase 18 [Arabidopsis thaliana]	biological process: response to stimulus (GO:0050896);; cellular component: intracellular (GO:0005622);; cellular component: cellular anatomical entity (GO:0110165)
AT1G13245	RTFL17	16.7955	556	17.6228	525	32.6658	1004	31.0054	1090	0.0496895	0.869491	up	--	--	Biological Process: shoot system development (GO:0048367);;	--	--	--	--	DVL family	--	S	Function unknown	hypothetical protein ARALYDRAFT_888682 [Arabidopsis lyrata subsp. lyrata]	biological process: multicellular organismal process (GO:0032501);; biological process: developmental process (GO:0032502)
AT5G52310	RD29A	29.6843	3308	17.221	1725	62.365	6449	45.6839	5407	0.0272999	1.17661	up	--	--	Biological Process: response to abscisic acid (GO:0009737);;	--	--	--	--	--	Low-temperature-induced 78 kDa protein OS=Arabidopsis thaliana OX=3702 GN=RD29A PE=1 SV=2	--	--	low-temperature-responsive protein 78 (LTI78) / desiccation-responsive protein 29A (RD29A) [Arabidopsis thaliana]	biological process: response to stimulus (GO:0050896)
AT5G05220	AT5G05220	0.674766	22	0.775499	23	10.128	304	1.88544	65	0.0496895	2.92469	up	--	--	--	--	--	--	--	--	--	S	Function unknown	hypothetical protein AT5G05220 [Arabidopsis thaliana]	--
AT3G51420	SSL4	7.21008	623	7.08866	551	13.2892	1065	13.3925	1229	0.0489616	0.886132	up	[G]	Carbohydrate transport and metabolism	Biological Process: biosynthetic process (GO:0009058);; Molecular Function: strictosidine synthase activity (GO:0016844);;	--	--	[R]	General function prediction only	Strictosidine synthase	Protein STRICTOSIDINE SYNTHASE-LIKE 4 OS=Arabidopsis thaliana OX=3702 GN=SSL4 PE=1 SV=1	G	Carbohydrate transport and metabolism	strictosidine synthase-like 4 [Arabidopsis thaliana]	biological process: metabolic process (GO:0008152);; molecular function: catalytic activity (GO:0003824)
AT1G22630	AT1G22630	10.6828	329	13.2718	367	25.9978	741	24.5602	802	0.042187	1.05623	up	--	--	--	--	--	--	--	--	--	S	Function unknown	SSUH2-like protein [Arabidopsis thaliana]	--
AT1G32080	PLGG1	7.75059	652	6.25918	473	27.8707	2174	14.1447	1263	0.00319223	1.52978	up	[M]	Cell wall/membrane/envelope biogenesis	Cellular Component: integral component of membrane (GO:0016021);;	--	--	--	--	LrgB-like family	Plastidal glycolate/glycerate translocator 1, chloroplastic OS=Arabidopsis thaliana OX=3702 GN=PLGG1 PE=1 SV=1	M	Cell wall/membrane/envelope biogenesis	membrane protein [Arabidopsis thaliana]	cellular component: cellular anatomical entity (GO:0110165)
AT4G38770	PRP4	15.1379	1226	19.4825	1418	61.0341	4586	34.0742	2931	0.00305438	1.40424	up	--	--	Cellular Component: cellular_component (GO:0005575);; Cellular Component: cell wall (GO:0005618);; Cellular Component: obsolete cell (GO:0005623);; Biological Process: biological_process (GO:0008150);; Biological Process: plant-type cell wall organization (GO:0009664);; Biological Process: cellular process (GO:0009987);; Biological Process: cellular component organization (GO:0016043);; Cellular …	--	--	--	--	Pollen protein Ole e 1 like	Proline-rich protein 4 OS=Arabidopsis thaliana OX=3702 GN=PRP4 PE=2 SV=1	S	Function unknown	proline-rich protein 4 [Arabidopsis thaliana]	cellular component: cellular anatomical entity (GO:0110165);; biological process: cellular process (GO:0009987)
AT5G20630	GER3	0.16773	8	0.351576	14	17.9423	703	1.31766	60	0.000799212	4.97765	up	--	--	Cellular Component: cell wall (GO:0005618);; Molecular Function: manganese ion binding (GO:0030145);; Molecular Function: nutrient reservoir activity (GO:0045735);; Cellular Component: apoplast (GO:0048046);;	--	--	--	--	Cupin	Germin-like protein subfamily 3 member 3 OS=Arabidopsis thaliana OX=3702 GN=GER3 PE=1 SV=1	S	Function unknown	germin 3 [Arabidopsis thaliana]	cellular component: cellular anatomical entity (GO:0110165);; molecular function: binding (GO:0005488);; molecular function: nutrient reservoir activity (GO:0045735)
AT3G15360	ATHM4	54.4437	2661	47.6042	2091	88.7643	4026	93.4064	4849	0.044862	0.827541	up	[O]	Posttranslational modification, protein turnover, chaperones	Biological Process: glycerol ether metabolic process (GO:0006662);; Molecular Function: protein disulfide oxidoreductase activity (GO:0015035);; Biological Process: cell redox homeostasis (GO:0045454);;	K03671|3.3e-101|ath:AT3G15360|K03671 thioredoxin 1 | (RefSeq) TRX-M4; thioredoxin M-type 4	--	[O]	Posttranslational modification, protein turnover, chaperones	Thioredoxin	Thioredoxin M4, chloroplastic OS=Arabidopsis thaliana OX=3702 GN=At3g15360 PE=2 SV=2	O	Posttranslational modification, protein turnover, chaperones	thioredoxin M-type 4 [Arabidopsis thaliana]	biological process: metabolic process (GO:0008152);; molecular function: catalytic activity (GO:0003824);; biological process: cellular process (GO:0009987);; biological process: biological regulation (GO:0065007)
AT3G26300	CYP71B34	3.36293	254	4.55959	309	10.7383	751	7.51691	602	0.0496895	1.16374	up	[QV]	Secondary metabolites biosynthesis, transport and catabolism;; Defense mechanisms	Molecular Function: iron ion binding (GO:0005506);; Molecular Function: oxidoreductase activity, acting on paired donors, with incorporation or reduction of molecular oxygen (GO:0016705);; Molecular Function: heme binding (GO:0020037);;	K01773|3.1e-151|pop:7480952|K01773 aldoxime dehydratase [EC:4.99.1.-] | (RefSeq) cytochrome P450 71B36	--	[Q]	Secondary metabolites biosynthesis, transport and catabolism	Cytochrome P450	Cytochrome P450 71B34 OS=Arabidopsis thaliana OX=3702 GN=CYP71B34 PE=2 SV=1	Q	Secondary metabolites biosynthesis, transport and catabolism	cytochrome P450, family 71, subfamily B, polypeptide 34 [Arabidopsis thaliana]	molecular function: binding (GO:0005488);; biological process: metabolic process (GO:0008152);; molecular function: catalytic activity (GO:0003824)
AT3G20680	AT3G20680	3.8982	184	3.07231	131	9.26478	406	7.13986	358	0.0483605	1.20352	up	--	--	--	--	--	--	--	Domain of unknown function (DUF1995)	--	S	Function unknown	plant/protein (DUF1995) [Arabidopsis thaliana]	--
AT1G12090	ELP	7.28692	364	18.9313	851	126.213	5851	35.3417	1876	0.00676712	2.52333	up	--	--	Cellular Component: cellular_component (GO:0005575);; Cellular Component: intracellular (GO:0005622);; Cellular Component: obsolete cell (GO:0005623);; Cellular Component: cytoplasm (GO:0005737);; Cellular Component: endoplasmic reticulum (GO:0005783);; Cellular Component: cell-cell junction (GO:0005911);; Biological Process: response to stress (GO:0006950);; Biological Process: defense response …	K11855|5.2e-16|bvg:104906049|K11855 ubiquitin carboxyl-terminal hydrolase 36/42 [EC:3.4.19.12] | (RefSeq) ubiquitin carboxyl-terminal hydrolase 36	--	--	--	Hydrophobic seed protein	Lipid transfer protein EARLI 1 OS=Arabidopsis thaliana OX=3702 GN=EARLI1 PE=1 SV=1	S	Function unknown	extensin-like protein [Arabidopsis thaliana]	cellular component: intracellular (GO:0005622);; cellular component: cellular anatomical entity (GO:0110165);; biological process: response to stimulus (GO:0050896);; biological process: multicellular organismal process (GO:0032501);; biological process: developmental process (GO:0032502);; biological process: interspecies interaction between organisms (GO:0044419);; biological process: multi-org…
AT5G53490	AT5G53490	14.4145	599	13.3922	487	28.3316	1050	24.7885	1068	0.028605	0.885386	up	--	--	--	--	--	--	--	Pentapeptide repeats (8 copies)	Thylakoid lumenal 17.4 kDa protein, chloroplastic OS=Arabidopsis thaliana OX=3702 GN=TL17 PE=1 SV=2	S	Function unknown	Tetratricopeptide repeat (TPR)-like superfamily protein [Arabidopsis thaliana]	--
AT2G15050	LTP7	3.13902	337	2.78416	261	6.35711	621	5.51047	629	0.044862	0.987519	up	--	--	Biological Process: lipid transport (GO:0006869);; Molecular Function: lipid binding (GO:0008289);;	--	--	--	--	Protease inhibitor/seed storage/LTP family	Non-specific lipid-transfer protein 7 OS=Arabidopsis thaliana OX=3702 GN=LTP7 PE=2 SV=1	--	--	lipid transfer protein [Arabidopsis thaliana]	biological process: localization (GO:0051179);; molecular function: binding (GO:0005488)
AT3G59940	SKIP20	28.5168	1890	31.5462	1880	62.7052	3857	47.0608	3313	0.0177763	0.836515	up	--	--	Molecular Function: protein binding (GO:0005515);; Cellular Component: cellular_component (GO:0005575);; Cellular Component: intracellular (GO:0005622);; Cellular Component: obsolete cell (GO:0005623);; Cellular Component: cytoplasm (GO:0005737);; Cellular Component: cytosol (GO:0005829);; Biological Process: biological_process (GO:0008150);; Biological Process: regulation of signal transduction …	--	--	[R]	General function prediction only	Kelch motif	F-box/kelch-repeat protein SKIP20 OS=Arabidopsis thaliana OX=3702 GN=SKIP20 PE=1 SV=1	S	Function unknown	Galactose oxidase/kelch repeat superfamily protein [Arabidopsis thaliana]	molecular function: binding (GO:0005488);; cellular component: intracellular (GO:0005622);; cellular component: cellular anatomical entity (GO:0110165);; biological process: biological regulation (GO:0065007)
AT1G18730	PNSB4	6.50509	253	6.93344	231	21.049	763	22.6425	823	7.05e-06	1.62954	up	--	--	Cellular Component: chloroplast thylakoid membrane (GO:0009535);; Biological Process: photosynthetic electron transport in photosystem I (GO:0009773);; Cellular Component: NAD(P)H dehydrogenase complex (plastoquinone) (GO:0010598);; Cellular Component: integral component of membrane (GO:0016021);;	--	--	--	--	--	Photosynthetic NDH subunit of subcomplex B 4, chloroplastic OS=Arabidopsis thaliana OX=3702 GN=PNSB4 PE=2 SV=1	S	Function unknown	NDH dependent flow 6 [Arabidopsis thaliana]	cellular component: intracellular (GO:0005622);; cellular component: cellular anatomical entity (GO:0110165);; biological process: metabolic process (GO:0008152);; biological process: cellular process (GO:0009987);; cellular component: protein-containing complex (GO:0032991)
AT2G39730	RCA	240.746	19925	278.796	20741	696.149	53471	435.636	38279	0.00493945	1.07757	up	[G]	Carbohydrate transport and metabolism	Molecular Function: ATP binding (GO:0005524);;	--	--	[O]	Posttranslational modification, protein turnover, chaperones	ATPase family associated with various cellular activities (AAA)	Ribulose bisphosphate carboxylase/oxygenase activase, chloroplastic OS=Arabidopsis thaliana OX=3702 GN=RCA PE=1 SV=2	O	Posttranslational modification, protein turnover, chaperones	rubisco activase [Arabidopsis thaliana]	molecular function: binding (GO:0005488)
AT4G37925	NDHM	3.06692	129	6.89283	260	23.1795	903	13.5016	602	0.0285974	1.82437	up	--	--	Molecular Function: oxidoreductase activity, acting on NAD(P)H, quinone or similar compound as acceptor (GO:0016655);;	--	--	--	--	Cyanobacterial and plastid NDH-1 subunit M	NAD(P)H-quinone oxidoreductase subunit M, chloroplastic OS=Arabidopsis thaliana OX=3702 GN=ndhM PE=2 SV=1	C	Energy production and conversion	subunit NDH-M of NAD(P)H:plastoquinone dehydrogenase complex [Arabidopsis thaliana]	biological process: metabolic process (GO:0008152);; molecular function: catalytic activity (GO:0003824)
AT1G67700	HHL1	36.6237	1661	36.9765	1580	72.4035	3129	53.0796	2676	0.0444802	0.752148	up	--	--	Molecular Function: molecular_function (GO:0003674);; Molecular Function: catalytic activity (GO:0003824);; Molecular Function: endopeptidase activity (GO:0004175);; Molecular Function: metalloendopeptidase activity (GO:0004222);; Cellular Component: cellular_component (GO:0005575);; Cellular Component: intracellular (GO:0005622);; Cellular Component: obsolete cell (GO:0005623);; Cellular Compone…	--	--	[O]	Posttranslational modification, protein turnover, chaperones	--	Protein HHL1, chloroplastic OS=Arabidopsis thaliana OX=3702 GN=HHL1 PE=1 SV=1	S	Function unknown	multidrug resistance protein [Arabidopsis thaliana]	molecular function: catalytic activity (GO:0003824);; biological process: metabolic process (GO:0008152);; cellular component: intracellular (GO:0005622);; cellular component: cellular anatomical entity (GO:0110165);; biological process: cellular process (GO:0009987)
AT1G70760	ndhL	5.01851	174	8.50038	264	30.6291	980	23.3619	856	0.000216268	1.9575	up	--	--	Cellular Component: integral component of membrane (GO:0016021);; Molecular Function: oxidoreductase activity, acting on NAD(P)H, quinone or similar compound as acceptor (GO:0016655);;	--	--	--	--	NADH dehydrogenase transmembrane subunit	NAD(P)H-quinone oxidoreductase subunit L, chloroplastic OS=Arabidopsis thaliana OX=3702 GN=ndhL PE=2 SV=1	S	Function unknown	inorganic carbon transport protein-like protein [Arabidopsis thaliana]	cellular component: cellular anatomical entity (GO:0110165);; biological process: metabolic process (GO:0008152);; molecular function: catalytic activity (GO:0003824)
AT3G21760	UGT71B2	4.3139	307	2.40992	154	12.8617	848	7.10771	537	0.0412183	1.52382	up	[G]	Carbohydrate transport and metabolism	Molecular Function: UDP-glycosyltransferase activity (GO:0008194);;	K22950|1.8e-98|fve:101295404|K22950 acylphloroglucinol glucosyltransferase [EC:2.4.1.358] | (RefSeq) anthocyanidin 3-O-glucosyltransferase 2-like	--	[GC]	Carbohydrate transport and metabolism;; Energy production and conversion	UDP-glucoronosyl and UDP-glucosyl transferase	UDP-glycosyltransferase 71B2 OS=Arabidopsis thaliana OX=3702 GN=UGT71B2 PE=1 SV=1	S	Function unknown	UDP-Glycosyltransferase superfamily protein [Arabidopsis thaliana]	molecular function: catalytic activity (GO:0003824)
AT2G26910	ABCG32	2.43776	506	2.69459	503	5.72355	1102	4.34648	958	0.028605	0.939352	up	[T]	Signal transduction mechanisms	Molecular Function: ATP binding (GO:0005524);; Cellular Component: integral component of membrane (GO:0016021);; Molecular Function: ATPase activity (GO:0016887);;	K08712|9.6e-129|gsl:Gasu_29800|K08712 ATP-binding cassette, subfamily G (WHITE), member 2, SNQ2 | (RefSeq) ABC transporter, ATP-binding protein	ABC transporters (ko02010)	[Q]	Secondary metabolites biosynthesis, transport and catabolism	ABC-2 type transporter	ABC transporter G family member 32 OS=Arabidopsis thaliana OX=3702 GN=ABCG32 PE=1 SV=1	V	Defense mechanisms	pleiotropic drug resistance 4 [Arabidopsis thaliana]	molecular function: binding (GO:0005488);; cellular component: cellular anatomical entity (GO:0110165);; molecular function: catalytic activity (GO:0003824)
AT2G13360	AGT1	94.2389	6122	98.7521	5816	249.668	15187	214.658	14906	8.71e-08	1.24736	up	[EF]	Amino acid transport and metabolism;; Nucleotide transport and metabolism	Molecular Function: catalytic activity (GO:0003824);;	K00830|1.1e-234|ath:AT2G13360|K00830 alanine-glyoxylate transaminase / serine-glyoxylate transaminase / serine-pyruvate transaminase [EC:2.6.1.44 2.6.1.45 2.6.1.51] | (RefSeq) AGT; alanine:glyoxylate aminotransferase	Alanine, aspartate and glutamate metabolism (ko00250);; Glycine, serine and threonine metabolism (ko00260);; Glyoxylate and dicarboxylate metabolism (ko00630);; Carbon metabolism (ko01200);; Peroxisome (ko04146)	[R]	General function prediction only	Aminotransferase class-V	Serine--glyoxylate aminotransferase OS=Arabidopsis thaliana OX=3702 GN=AGT1 PE=1 SV=2	E	Amino acid transport and metabolism	alanine:glyoxylate aminotransferase [Arabidopsis thaliana]	molecular function: catalytic activity (GO:0003824)
AT4G14090	UGT75C1	10.95	755	16.3395	1013	40.43	2587	24.6364	1805	0.0388528	1.20376	up	--	--	Molecular Function: UDP-glycosyltransferase activity (GO:0008194);;	K12338|2.7e-266|ath:AT4G14090|K12338 anthocyanidin 3-O-glucoside 5-O-glucosyltransferase [EC:2.4.1.298] | (RefSeq) UDP-Glycosyltransferase superfamily protein	Anthocyanin biosynthesis (ko00942)	[GC]	Carbohydrate transport and metabolism;; Energy production and conversion	UDP-glucoronosyl and UDP-glucosyl transferase	UDP-glycosyltransferase 75C1 OS=Arabidopsis thaliana OX=3702 GN=UGT75C1 PE=2 SV=2	S	Function unknown	putative glucosyltransferase, partial [Arabidopsis thaliana]	molecular function: catalytic activity (GO:0003824)
AT5G21100	AT5G21100	1.42461	130	2.37563	194	10.1584	856	4.48037	433	0.0176423	1.87413	up	[DPM]	Cell cycle control, cell division, chromosome partitioning;; Inorganic ion transport and metabolism;; Cell wall/membrane/envelope biogenesis	Molecular Function: copper ion binding (GO:0005507);; Cellular Component: extracellular region (GO:0005576);; Molecular Function: oxidoreductase activity (GO:0016491);;	K00423|0.0e+00|ath:AT5G21100|K00423 L-ascorbate oxidase [EC:1.10.3.3] | (RefSeq) Plant L-ascorbate oxidase	Ascorbate and aldarate metabolism (ko00053)	[Q]	Secondary metabolites biosynthesis, transport and catabolism	Multicopper oxidase	L-ascorbate oxidase OS=Arabidopsis thaliana OX=3702 GN=AAO PE=1 SV=1	Q	Secondary metabolites biosynthesis, transport and catabolism	Plant L-ascorbate oxidase [Arabidopsis thaliana]	molecular function: binding (GO:0005488);; cellular component: cellular anatomical entity (GO:0110165);; molecular function: catalytic activity (GO:0003824)
AT4G09010	APX4	15.3106	823	22.337	1079	60.9528	3032	36.1282	2059	0.0139016	1.31209	up	--	--	Molecular Function: peroxidase activity (GO:0004601);; Biological Process: response to oxidative stress (GO:0006979);; Molecular Function: heme binding (GO:0020037);;	K00434|5.4e-156|ath:AT4G09010|K00434 L-ascorbate peroxidase [EC:1.11.1.11] | (RefSeq) TL29; ascorbate peroxidase 4	Ascorbate and aldarate metabolism (ko00053);; Glutathione metabolism (ko00480)	--	--	Peroxidase	Thylakoid lumenal 29 kDa protein, chloroplastic OS=Arabidopsis thaliana OX=3702 GN=TL29 PE=1 SV=2	S	Function unknown	ascorbate peroxidase 4 [Arabidopsis thaliana]	biological process: metabolic process (GO:0008152);; biological process: cellular process (GO:0009987);; biological process: response to stimulus (GO:0050896);; biological process: detoxification (GO:0098754);; molecular function: catalytic activity (GO:0003824);; molecular function: antioxidant activity (GO:0016209);; molecular function: binding (GO:0005488)
AT3G13730	CYP90D1	24.6415	2105	19.4739	1489	12.5065	990	10.7517	983	0.0165257	-0.936837	down	[QV]	Secondary metabolites biosynthesis, transport and catabolism;; Defense mechanisms	Molecular Function: monooxygenase activity (GO:0004497);; Molecular Function: iron ion binding (GO:0005506);; Cellular Component: integral component of membrane (GO:0016021);; Molecular Function: oxidoreductase activity, acting on paired donors, with incorporation or reduction of molecular oxygen (GO:0016705);; Molecular Function: heme binding (GO:0020037);;	K12638|1.7e-255|ath:AT3G13730|K12638 3-epi-6-deoxocathasterone 23-monooxygenase [EC:1.14.14.147] | (RefSeq) CYP90D1; cytochrome P450, family 90, subfamily D, polypeptide 1	Brassinosteroid biosynthesis (ko00905)	[QI]	Secondary metabolites biosynthesis, transport and catabolism;; Lipid transport and metabolism	Cytochrome P450	3-epi-6-deoxocathasterone 23-monooxygenase CYP90D1 OS=Arabidopsis thaliana OX=3702 GN=CYP90D1 PE=1 SV=1	Q	Secondary metabolites biosynthesis, transport and catabolism	cytochrome P450, family 90, subfamily D, polypeptide 1 [Arabidopsis thaliana]	biological process: metabolic process (GO:0008152);; molecular function: catalytic activity (GO:0003824);; molecular function: binding (GO:0005488);; cellular component: cellular anatomical entity (GO:0110165)
AT1G12900	GAPA-2	51.6286	3332	69.6597	4007	159.549	9484	97.4321	6590	0.0463009	1.02709	up	[G]	Carbohydrate transport and metabolism	Biological Process: glucose metabolic process (GO:0006006);; Cellular Component: integral component of membrane (GO:0016021);; Molecular Function: oxidoreductase activity, acting on the aldehyde or oxo group of donors, NAD or NADP as acceptor (GO:0016620);; Molecular Function: NADP binding (GO:0050661);; Molecular Function: NAD binding (GO:0051287);;	K05298|9.3e-232|crb:17897550|K05298 glyceraldehyde-3-phosphate dehydrogenase (NADP+) (phosphorylating) [EC:1.2.1.13] | (RefSeq) LOW QUALITY PROTEIN: glyceraldehyde-3-phosphate dehydrogenase GAPA2, chloroplastic	Carbon fixation in photosynthetic organisms (ko00710);; Carbon metabolism (ko01200)	[G]	Carbohydrate transport and metabolism	Glyceraldehyde 3-phosphate dehydrogenase, C-terminal domain	Glyceraldehyde-3-phosphate dehydrogenase GAPA2, chloroplastic OS=Arabidopsis thaliana OX=3702 GN=GAPA2 PE=2 SV=1	G	Carbohydrate transport and metabolism	glyceraldehyde 3-phosphate dehydrogenase A subunit 2 [Arabidopsis thaliana]	biological process: metabolic process (GO:0008152);; cellular component: cellular anatomical entity (GO:0110165);; molecular function: catalytic activity (GO:0003824);; molecular function: binding (GO:0005488)
AT1G42970	GAPB	102.358	7940	105.993	7390	253.678	18261	156.095	12862	0.0206852	0.930766	up	[G]	Carbohydrate transport and metabolism	Biological Process: glucose metabolic process (GO:0006006);; Molecular Function: oxidoreductase activity, acting on the aldehyde or oxo group of donors, NAD or NADP as acceptor (GO:0016620);; Molecular Function: NADP binding (GO:0050661);; Molecular Function: NAD binding (GO:0051287);;	K05298|2.3e-254|ath:AT1G42970|K05298 glyceraldehyde-3-phosphate dehydrogenase (NADP+) (phosphorylating) [EC:1.2.1.13] | (RefSeq) GAPB; glyceraldehyde-3-phosphate dehydrogenase B subunit	Carbon fixation in photosynthetic organisms (ko00710);; Carbon metabolism (ko01200)	[G]	Carbohydrate transport and metabolism	Glyceraldehyde 3-phosphate dehydrogenase, C-terminal domain	Glyceraldehyde-3-phosphate dehydrogenase GAPB, chloroplastic OS=Arabidopsis thaliana OX=3702 GN=GAPB PE=1 SV=2	G	Carbohydrate transport and metabolism	glyceraldehyde-3-phosphate dehydrogenase B subunit [Arabidopsis thaliana]	biological process: metabolic process (GO:0008152);; molecular function: catalytic activity (GO:0003824);; molecular function: binding (GO:0005488)
AT3G55800	SBPASE	37.9992	2778	44.6083	2931	100.221	6798	62.9551	4888	0.0381471	0.936654	up	[G]	Carbohydrate transport and metabolism	Biological Process: carbohydrate metabolic process (GO:0005975);; Molecular Function: phosphatase activity (GO:0016791);;	K01100|2.0e-222|ath:AT3G55800|K01100 sedoheptulose-bisphosphatase [EC:3.1.3.37] | (RefSeq) SBPASE; sedoheptulose-bisphosphatase	Carbon fixation in photosynthetic organisms (ko00710);; Carbon metabolism (ko01200)	[G]	Carbohydrate transport and metabolism	Fructose-1-6-bisphosphatase, N-terminal domain	Sedoheptulose-1,7-bisphosphatase, chloroplastic OS=Arabidopsis thaliana OX=3702 GN=At3g55800 PE=2 SV=1	G	Carbohydrate transport and metabolism	sedoheptulose-bisphosphatase [Arabidopsis thaliana]	biological process: metabolic process (GO:0008152);; molecular function: catalytic activity (GO:0003824)
AT1G32060	PRK	37.2454	2946	54.7592	3892	125.621	9219	82.4156	6923	0.0242526	1.13177	up	[F]	Nucleotide transport and metabolism	Molecular Function: ATP binding (GO:0005524);; Biological Process: carbohydrate metabolic process (GO:0005975);; Molecular Function: phosphoribulokinase activity (GO:0008974);;	K00855|3.9e-229|ath:AT1G32060|K00855 phosphoribulokinase [EC:2.7.1.19] | (RefSeq) PRK; phosphoribulokinase	Carbon fixation in photosynthetic organisms (ko00710);; Carbon metabolism (ko01200)	[TZ]	Signal transduction mechanisms;; Cytoskeleton	Phosphoribulokinase / Uridine kinase family	Phosphoribulokinase, chloroplastic OS=Arabidopsis thaliana OX=3702 GN=At1g32060 PE=1 SV=1	F	Nucleotide transport and metabolism	phosphoribulokinase [Arabidopsis thaliana]	molecular function: binding (GO:0005488);; biological process: metabolic process (GO:0008152);; biological process: cellular process (GO:0009987);; molecular function: catalytic activity (GO:0003824)
AT1G25440	COL16	7.44764	542	8.47001	554	17.8319	1203	13.8638	1071	0.0204758	0.961628	up	--	--	Cellular Component: nucleus (GO:0005634);; Molecular Function: zinc ion binding (GO:0008270);;	K12135|1.4e-06|thj:104802991|K12135 zinc finger protein CONSTANS | (RefSeq) zinc finger protein CONSTANS-LIKE 2-like	Circadian rhythm - plant (ko04712)	[K]	Transcription	CCT motif	Zinc finger protein CONSTANS-LIKE 16 OS=Arabidopsis thaliana OX=3702 GN=COL16 PE=1 SV=2	K	Transcription	B-box type zinc finger protein with CCT domain-containing protein [Arabidopsis thaliana]	cellular component: intracellular (GO:0005622);; cellular component: cellular anatomical entity (GO:0110165);; molecular function: binding (GO:0005488)
AT1G73870	COL7	0.774582	55	0.58516	38	5.70252	376	1.85891	141	0.0204758	2.38885	up	--	--	Molecular Function: zinc ion binding (GO:0008270);;	K12135|9.4e-10|aly:9307757|K12135 zinc finger protein CONSTANS | (RefSeq) zinc finger protein CONSTANS	Circadian rhythm - plant (ko04712)	[K]	Transcription	CCT motif	Zinc finger protein CONSTANS-LIKE 7 OS=Arabidopsis thaliana OX=3702 GN=COL7 PE=2 SV=1	K	Transcription	B-box type zinc finger protein with CCT domain-containing protein [Arabidopsis thaliana]	molecular function: binding (GO:0005488)
AT1G56650	MYB75	6.75138	314	6.55133	274	16.7588	722	12.4924	616	0.0124525	1.10179	up	--	--	Molecular Function: DNA binding (GO:0003677);; Cellular Component: nucleus (GO:0005634);;	K16166|7.5e-146|ath:AT1G56650|K16166 transcription factor MYB75 | (RefSeq) PAP1; production of anthocyanin pigment 1	Circadian rhythm - plant (ko04712)	[K]	Transcription	Myb-like DNA-binding domain	Transcription factor MYB75 OS=Arabidopsis thaliana OX=3702 GN=MYB75 PE=1 SV=1	K	Transcription	production of anthocyanin pigment 1 [Arabidopsis thaliana]	molecular function: binding (GO:0005488);; cellular component: intracellular (GO:0005622);; cellular component: cellular anatomical entity (GO:0110165)
AT5G09660	PMDH2	44.0039	2758	52.6433	2913	114.073	6692	75.3505	5016	0.0216656	0.949622	up	[C]	Energy production and conversion	Biological Process: carbohydrate metabolic process (GO:0005975);; Biological Process: tricarboxylic acid cycle (GO:0006099);; Biological Process: malate metabolic process (GO:0006108);; Molecular Function: L-malate dehydrogenase activity (GO:0030060);;	K00026|1.5e-152|ath:AT5G09660|K00026 malate dehydrogenase [EC:1.1.1.37] | (RefSeq) PMDH2; peroxisomal NAD-malate dehydrogenase 2	Citrate cycle (TCA cycle) (ko00020);; Cysteine and methionine metabolism (ko00270);; Pyruvate metabolism (ko00620);; Glyoxylate and dicarboxylate metabolism (ko00630);; Carbon fixation in photosynthetic organisms (ko00710);; Carbon metabolism (ko01200)	[C]	Energy production and conversion	lactate/malate dehydrogenase, NAD binding domain	Malate dehydrogenase 2, peroxisomal OS=Arabidopsis thaliana OX=3702 GN=PMDH2 PE=1 SV=1	C	Energy production and conversion	peroxisomal NAD-malate dehydrogenase 2 [Arabidopsis thaliana]	biological process: metabolic process (GO:0008152);; biological process: cellular process (GO:0009987);; molecular function: catalytic activity (GO:0003824)
AT1G45191	BGLU1	0.381419	34	0.491311	39	3.88758	298	1.34924	126	0.0172379	2.43121	up	[G]	Carbohydrate transport and metabolism	Molecular Function: hydrolase activity, hydrolyzing O-glycosyl compounds (GO:0004553);; Biological Process: carbohydrate metabolic process (GO:0005975);; Cellular Component: integral component of membrane (GO:0016021);;	K01188|1.5e-231|ath:AT1G45191|K01188 beta-glucosidase [EC:3.2.1.21] | (RefSeq) BGLU1; Glycosyl hydrolase superfamily protein	Cyanoamino acid metabolism (ko00460);; Starch and sucrose metabolism (ko00500);; Phenylpropanoid biosynthesis (ko00940)	[G]	Carbohydrate transport and metabolism	Glycosyl hydrolase family 1	Beta-glucosidase 1 OS=Arabidopsis thaliana OX=3702 GN=BGLU1 PE=3 SV=2	G	Carbohydrate transport and metabolism	Glycosyl hydrolase superfamily protein [Arabidopsis thaliana]	molecular function: catalytic activity (GO:0003824);; biological process: metabolic process (GO:0008152);; cellular component: cellular anatomical entity (GO:0110165)
AT4G23600	CORI3	10.5877	830	10.3504	727	64.2931	4627	28.4663	2343	1.83e-05	2.06959	up	[E]	Amino acid transport and metabolism	Biological Process: cellular amino acid metabolic process (GO:0006520);; Molecular Function: transaminase activity (GO:0008483);; Biological Process: biosynthetic process (GO:0009058);; Molecular Function: pyridoxal phosphate binding (GO:0030170);;	K21623|2.2e-246|ath:AT4G23600|K21623 L-cystine beta-lyase [EC:4.4.1.35] | (RefSeq) CORI3; Tyrosine transaminase family protein	Cysteine and methionine metabolism (ko00270)	[E]	Amino acid transport and metabolism	Aminotransferase class I and II	Cystine lyase CORI3 OS=Arabidopsis thaliana OX=3702 GN=CORI3 PE=1 SV=1	E	Amino acid transport and metabolism	Tyrosine transaminase family protein [Arabidopsis thaliana]	biological process: metabolic process (GO:0008152);; biological process: cellular process (GO:0009987);; molecular function: catalytic activity (GO:0003824);; molecular function: binding (GO:0005488)
AT3G26740	CCL	16.7837	750	19.3363	777	59.5403	2469	53.33	2532	1.72e-08	1.62169	up	--	--	Cellular Component: chloroplast (GO:0009507);;	K12198|1.3e-14|sita:101765827|K12198 charged multivesicular body protein 5 | (RefSeq) vacuolar protein sorting-associated protein 60.1	Endocytosis (ko04144)	--	--	Light regulated protein Lir1	Light-regulated protein 1, chloroplastic OS=Arabidopsis thaliana OX=3702 GN=LIR1 PE=1 SV=1	S	Function unknown	CCR-like protein [Arabidopsis thaliana]	cellular component: intracellular (GO:0005622);; cellular component: cellular anatomical entity (GO:0110165)
AT2G47240	LACS1	0.809545	91	1.49827	144	7.24557	669	2.99961	330	0.0231702	1.96705	up	[I]	Lipid transport and metabolism	Molecular Function: catalytic activity (GO:0003824);;	K01897|0.0e+00|ath:AT2G47240|K01897 long-chain acyl-CoA synthetase [EC:6.2.1.3] | (RefSeq) LACS1; AMP-dependent synthetase and ligase family protein	Fatty acid biosynthesis (ko00061);; Fatty acid degradation (ko00071);; Fatty acid metabolism (ko01212);; Peroxisome (ko04146)	[I]	Lipid transport and metabolism	AMP-binding enzyme	Long chain acyl-CoA synthetase 1 OS=Arabidopsis thaliana OX=3702 GN=LACS1 PE=2 SV=1	I	Lipid transport and metabolism	AMP-dependent synthetase and ligase family protein [Arabidopsis thaliana]	molecular function: catalytic activity (GO:0003824)
AT5G07990	CYP75B1	5.70311	461	7.57437	550	25.6943	1925	14.1505	1214	0.00319223	1.52992	up	[QV]	Secondary metabolites biosynthesis, transport and catabolism;; Defense mechanisms	Molecular Function: monooxygenase activity (GO:0004497);; Molecular Function: iron ion binding (GO:0005506);; Molecular Function: oxidoreductase activity, acting on paired donors, with incorporation or reduction of molecular oxygen (GO:0016705);; Molecular Function: heme binding (GO:0020037);;	K05280|7.1e-300|ath:AT5G07990|K05280 flavonoid 3'-monooxygenase [EC:1.14.14.82] | (RefSeq) TT7; Cytochrome P450 superfamily protein	Flavonoid biosynthesis (ko00941);; Flavone and flavonol biosynthesis (ko00944)	[Q]	Secondary metabolites biosynthesis, transport and catabolism	Cytochrome P450	Flavonoid 3'-monooxygenase OS=Arabidopsis thaliana OX=3702 GN=CYP75B1 PE=1 SV=1	Q	Secondary metabolites biosynthesis, transport and catabolism	Cytochrome P450 superfamily protein [Arabidopsis thaliana]	biological process: metabolic process (GO:0008152);; molecular function: catalytic activity (GO:0003824);; molecular function: binding (GO:0005488)
AT1G29670	AT1G29670	3.2216	181	4.02163	203	13.2883	690	8.89799	529	0.00168344	1.56881	up	[IR]	Lipid transport and metabolism;; General function prediction only	Molecular Function: hydrolase activity, acting on ester bonds (GO:0016788);;	K00679|3.9e-49|cic:CICLE_v10027727mg|K00679 phospholipid:diacylglycerol acyltransferase [EC:2.3.1.158] | (RefSeq) hypothetical protein	Glycerolipid metabolism (ko00561)	--	--	GDSL-like Lipase/Acylhydrolase	GDSL esterase/lipase At1g29670 OS=Arabidopsis thaliana OX=3702 GN=At1g29670 PE=2 SV=1	S	Function unknown	GDSL-like Lipase/Acylhydrolase superfamily protein [Arabidopsis thaliana]	molecular function: catalytic activity (GO:0003824)
AT1G18170	FKBP17-2	3.53758	173	3.62747	160	10.5027	477	6.7637	352	0.0463009	1.22653	up	[O]	Posttranslational modification, protein turnover, chaperones	Molecular Function: peptidyl-prolyl cis-trans isomerase activity (GO:0003755);;	K21362|6.1e-23|ini:109163326|K21362 galactolipid galactosyltransferase [EC:2.4.1.184] | (RefSeq) beta-glucosidase-like SFR2, chloroplastic	Glycerolipid metabolism (ko00561)	[O]	Posttranslational modification, protein turnover, chaperones	FKBP-type peptidyl-prolyl cis-trans isomerase	Peptidyl-prolyl cis-trans isomerase FKBP17-2, chloroplastic OS=Arabidopsis thaliana OX=3702 GN=FKBP17-2 PE=1 SV=1	O	Posttranslational modification, protein turnover, chaperones	FKBP-like peptidyl-prolyl cis-trans isomerase family protein [Arabidopsis thaliana]	molecular function: catalytic activity (GO:0003824)
AT4G37930	SHM1	145.746	12128	136.785	10231	266.307	20566	206.979	18296	0.0138844	0.715399	up	[E]	Amino acid transport and metabolism	Molecular Function: glycine hydroxymethyltransferase activity (GO:0004372);; Biological Process: glycine biosynthetic process from serine (GO:0019264);; Molecular Function: pyridoxal phosphate binding (GO:0030170);; Biological Process: tetrahydrofolate interconversion (GO:0035999);;	K00600|9.7e-297|ath:AT4G37930|K00600 glycine hydroxymethyltransferase [EC:2.1.2.1] | (RefSeq) SHM1; serine transhydroxymethyltransferase 1	Glycine, serine and threonine metabolism (ko00260);; Cyanoamino acid metabolism (ko00460);; Glyoxylate and dicarboxylate metabolism (ko00630);; One carbon pool by folate (ko00670);; Carbon metabolism (ko01200);; Biosynthesis of amino acids (ko01230)	[E]	Amino acid transport and metabolism	Serine hydroxymethyltransferase	Serine hydroxymethyltransferase 1, mitochondrial OS=Arabidopsis thaliana OX=3702 GN=SHM1 PE=1 SV=1	E	Amino acid transport and metabolism	serine transhydroxymethyltransferase 1 [Arabidopsis thaliana]	molecular function: catalytic activity (GO:0003824);; biological process: metabolic process (GO:0008152);; biological process: cellular process (GO:0009987);; molecular function: binding (GO:0005488)
AT1G32470	GDH3	36.7595	1275	38.8006	1210	94.9873	3058	65.0071	2395	0.00319223	1.04381	up	[E]	Amino acid transport and metabolism	Cellular Component: mitochondrion (GO:0005739);; Cellular Component: glycine cleavage complex (GO:0005960);; Biological Process: glycine decarboxylation via glycine cleavage system (GO:0019464);;	K02437|1.2e-86|ath:AT1G32470|K02437 glycine cleavage system H protein | (RefSeq) Single hybrid motif superfamily protein	Glycine, serine and threonine metabolism (ko00260);; Glyoxylate and dicarboxylate metabolism (ko00630);; Carbon metabolism (ko01200)	[E]	Amino acid transport and metabolism	Glycine cleavage H-protein	Glycine cleavage system H protein 3, mitochondrial OS=Arabidopsis thaliana OX=3702 GN=GDH3 PE=1 SV=1	E	Amino acid transport and metabolism	Single hybrid motif superfamily protein [Arabidopsis thaliana]	cellular component: intracellular (GO:0005622);; cellular component: cellular anatomical entity (GO:0110165);; cellular component: protein-containing complex (GO:0032991);; biological process: metabolic process (GO:0008152);; biological process: cellular process (GO:0009987)
AT2G35370	GDH1	84.8161	3350	82.0595	2914	177.519	6507	156.232	6555	0.000160564	0.978581	up	[E]	Amino acid transport and metabolism	Cellular Component: mitochondrion (GO:0005739);; Cellular Component: glycine cleavage complex (GO:0005960);; Biological Process: glycine decarboxylation via glycine cleavage system (GO:0019464);;	K02437|6.8e-87|ath:AT2G35370|K02437 glycine cleavage system H protein | (RefSeq) GDCH; glycine decarboxylase complex H	Glycine, serine and threonine metabolism (ko00260);; Glyoxylate and dicarboxylate metabolism (ko00630);; Carbon metabolism (ko01200)	[E]	Amino acid transport and metabolism	Glycine cleavage H-protein	Glycine cleavage system H protein 1, mitochondrial OS=Arabidopsis thaliana OX=3702 GN=GDH1 PE=1 SV=1	E	Amino acid transport and metabolism	glycine decarboxylase complex H [Arabidopsis thaliana]	cellular component: intracellular (GO:0005622);; cellular component: cellular anatomical entity (GO:0110165);; cellular component: protein-containing complex (GO:0032991);; biological process: metabolic process (GO:0008152);; biological process: cellular process (GO:0009987)
AT3G54050	CFBP1	32.2881	2191	35.0361	2135	83.8274	5276	55.5931	4004	0.00551659	1.00919	up	[G]	Carbohydrate transport and metabolism	Biological Process: carbohydrate metabolic process (GO:0005975);; Molecular Function: fructose 1,6-bisphosphate 1-phosphatase activity (GO:0042132);;	K03841|6.3e-230|ath:AT3G54050|K03841 fructose-1,6-bisphosphatase I [EC:3.1.3.11] | (RefSeq) HCEF1; high cyclic electron flow 1	Glycolysis / Gluconeogenesis (ko00010);; Pentose phosphate pathway (ko00030);; Fructose and mannose metabolism (ko00051);; Carbon fixation in photosynthetic organisms (ko00710);; Carbon metabolism (ko01200)	[G]	Carbohydrate transport and metabolism	Fructose-1-6-bisphosphatase, N-terminal domain	Fructose-1,6-bisphosphatase 1, chloroplastic OS=Arabidopsis thaliana OX=3702 GN=CFBP1 PE=1 SV=2	G	Carbohydrate transport and metabolism	high cyclic electron flow 1 [Arabidopsis thaliana]	biological process: metabolic process (GO:0008152);; biological process: cellular process (GO:0009987);; molecular function: catalytic activity (GO:0003824)
AT4G38970	FBA2	91.9902	6789	125.944	8355	366.958	25120	188.749	14791	0.0174106	1.29024	up	[G]	Carbohydrate transport and metabolism	Molecular Function: fructose-bisphosphate aldolase activity (GO:0004332);; Biological Process: glycolytic process (GO:0006096);;	K01623|3.8e-224|ath:AT4G38970|K01623 fructose-bisphosphate aldolase, class I [EC:4.1.2.13] | (RefSeq) FBA2; fructose-bisphosphate aldolase 2	Glycolysis / Gluconeogenesis (ko00010);; Pentose phosphate pathway (ko00030);; Fructose and mannose metabolism (ko00051);; Carbon fixation in photosynthetic organisms (ko00710);; Carbon metabolism (ko01200);; Biosynthesis of amino acids (ko01230)	[G]	Carbohydrate transport and metabolism	Fructose-bisphosphate aldolase class-I	Fructose-bisphosphate aldolase 2, chloroplastic OS=Arabidopsis thaliana OX=3702 GN=FBA2 PE=1 SV=2	G	Carbohydrate transport and metabolism	fructose-bisphosphate aldolase 2 [Arabidopsis thaliana]	molecular function: catalytic activity (GO:0003824);; biological process: metabolic process (GO:0008152);; biological process: cellular process (GO:0009987)
AT2G21330	FBA1	95.4939	7743	90.3451	6566	218.574	16364	142.626	12289	0.00850975	0.916656	up	[G]	Carbohydrate transport and metabolism	Molecular Function: fructose-bisphosphate aldolase activity (GO:0004332);; Biological Process: glycolytic process (GO:0006096);;	K01623|1.0e-224|ath:AT2G21330|K01623 fructose-bisphosphate aldolase, class I [EC:4.1.2.13] | (RefSeq) FBA1; fructose-bisphosphate aldolase 1	Glycolysis / Gluconeogenesis (ko00010);; Pentose phosphate pathway (ko00030);; Fructose and mannose metabolism (ko00051);; Carbon fixation in photosynthetic organisms (ko00710);; Carbon metabolism (ko01200);; Biosynthesis of amino acids (ko01230)	[G]	Carbohydrate transport and metabolism	Fructose-bisphosphate aldolase class-I	Fructose-bisphosphate aldolase 1, chloroplastic OS=Arabidopsis thaliana OX=3702 GN=FBA1 PE=1 SV=2	G	Carbohydrate transport and metabolism	fructose-bisphosphate aldolase 1 [Arabidopsis thaliana]	molecular function: catalytic activity (GO:0003824);; biological process: metabolic process (GO:0008152);; biological process: cellular process (GO:0009987)
AT5G38430	RBCS-1B	17.2453	1367	36.2441	2582	124.076	9125	105.452	8877	0.000148813	2.06851	up	[G]	Carbohydrate transport and metabolism	Molecular Function: monooxygenase activity (GO:0004497);; Cellular Component: chloroplast (GO:0009507);; Biological Process: photorespiration (GO:0009853);; Biological Process: carbon fixation (GO:0015977);; Biological Process: photosynthesis (GO:0015979);; Molecular Function: ribulose-bisphosphate carboxylase activity (GO:0016984);;	K01602|1.1e-101|ath:AT5G38430|K01602 ribulose-bisphosphate carboxylase small chain [EC:4.1.1.39] | (RefSeq) RBCS1B; Ribulose bisphosphate carboxylase (small chain) family protein	Glyoxylate and dicarboxylate metabolism (ko00630);; Carbon fixation in photosynthetic organisms (ko00710);; Carbon metabolism (ko01200)	--	--	Ribulose bisphosphate carboxylase, small chain	Ribulose bisphosphate carboxylase small chain 1B, chloroplastic OS=Arabidopsis thaliana OX=3702 GN=RBCS-1B PE=1 SV=1	C	Energy production and conversion	Ribulose bisphosphate carboxylase (small chain) family protein [Arabidopsis thaliana]	biological process: metabolic process (GO:0008152);; molecular function: catalytic activity (GO:0003824);; cellular component: intracellular (GO:0005622);; cellular component: cellular anatomical entity (GO:0110165);; biological process: cellular process (GO:0009987)
AT5G38410	AT5G38410	141.958	7188	237.904	10821	956.796	44528	538.656	28685	0.000117797	1.90706	up	[G]	Carbohydrate transport and metabolism	Molecular Function: monooxygenase activity (GO:0004497);; Cellular Component: chloroplast (GO:0009507);; Biological Process: photorespiration (GO:0009853);; Biological Process: carbon fixation (GO:0015977);; Biological Process: photosynthesis (GO:0015979);; Molecular Function: ribulose-bisphosphate carboxylase activity (GO:0016984);;	K01602|1.1e-101|ath:AT5G38410|K01602 ribulose-bisphosphate carboxylase small chain [EC:4.1.1.39] | (RefSeq) RBCS3B; Ribulose bisphosphate carboxylase (small chain) family protein	Glyoxylate and dicarboxylate metabolism (ko00630);; Carbon fixation in photosynthetic organisms (ko00710);; Carbon metabolism (ko01200)	--	--	Ribulose bisphosphate carboxylase, small chain	Ribulose bisphosphate carboxylase small chain 3B, chloroplastic OS=Arabidopsis thaliana OX=3702 GN=RBCS-3B PE=1 SV=2	C	Energy production and conversion	Ribulose bisphosphate carboxylase (small chain) family protein [Arabidopsis thaliana]	biological process: metabolic process (GO:0008152);; molecular function: catalytic activity (GO:0003824);; cellular component: intracellular (GO:0005622);; cellular component: cellular anatomical entity (GO:0110165);; biological process: cellular process (GO:0009987)
AT5G38420	RBCS-2B	19.3552	758	30.0043	1055	160.569	5830	62.9861	2618	0.000799212	2.10259	up	[G]	Carbohydrate transport and metabolism	Molecular Function: monooxygenase activity (GO:0004497);; Cellular Component: chloroplast (GO:0009507);; Biological Process: photorespiration (GO:0009853);; Biological Process: carbon fixation (GO:0015977);; Biological Process: photosynthesis (GO:0015979);; Molecular Function: ribulose-bisphosphate carboxylase activity (GO:0016984);;	K01602|4.8e-102|ath:AT5G38420|K01602 ribulose-bisphosphate carboxylase small chain [EC:4.1.1.39] | (RefSeq) RBCS2B; Ribulose bisphosphate carboxylase (small chain) family protein	Glyoxylate and dicarboxylate metabolism (ko00630);; Carbon fixation in photosynthetic organisms (ko00710);; Carbon metabolism (ko01200)	--	--	Ribulose bisphosphate carboxylase, small chain	Ribulose bisphosphate carboxylase small chain 2B, chloroplastic OS=Arabidopsis thaliana OX=3702 GN=RBCS-2B PE=2 SV=2	C	Energy production and conversion	Ribulose bisphosphate carboxylase (small chain) family protein [Arabidopsis thaliana]	biological process: metabolic process (GO:0008152);; molecular function: catalytic activity (GO:0003824);; cellular component: intracellular (GO:0005622);; cellular component: cellular anatomical entity (GO:0110165);; biological process: cellular process (GO:0009987)
AT1G67090	RBCS-1A	972.504	51590	1272.21	60663	2983.58	146886	2379.27	134075	0.00028153	1.22505	up	[G]	Carbohydrate transport and metabolism	Molecular Function: monooxygenase activity (GO:0004497);; Cellular Component: chloroplast (GO:0009507);; Biological Process: photorespiration (GO:0009853);; Biological Process: carbon fixation (GO:0015977);; Biological Process: photosynthesis (GO:0015979);; Molecular Function: ribulose-bisphosphate carboxylase activity (GO:0016984);;	K01602|2.8e-102|ath:AT1G67090|K01602 ribulose-bisphosphate carboxylase small chain [EC:4.1.1.39] | (RefSeq) RBCS1A; ribulose bisphosphate carboxylase small chain 1A	Glyoxylate and dicarboxylate metabolism (ko00630);; Carbon fixation in photosynthetic organisms (ko00710);; Carbon metabolism (ko01200)	--	--	Ribulose bisphosphate carboxylase, small chain	Ribulose bisphosphate carboxylase small chain 1A, chloroplastic OS=Arabidopsis thaliana OX=3702 GN=RBCS-1A PE=1 SV=2	C	Energy production and conversion	ribulose bisphosphate carboxylase small chain 1A [Arabidopsis thaliana]	biological process: metabolic process (GO:0008152);; molecular function: catalytic activity (GO:0003824);; cellular component: intracellular (GO:0005622);; cellular component: cellular anatomical entity (GO:0110165);; biological process: cellular process (GO:0009987)
AT5G36790	PGLP1A	10.1446	706	10.4549	651	27.8674	1771	16.2406	1199	0.038425	1.03921	up	[F]	Nucleotide transport and metabolism	Molecular Function: phosphatase activity (GO:0016791);;	K19269|2.5e-206|ath:AT5G36700|K19269 phosphoglycolate phosphatase [EC:3.1.3.18 3.1.3.48] | (RefSeq) PGLP1; 2-phosphoglycolate phosphatase 1	Glyoxylate and dicarboxylate metabolism (ko00630);; Carbon metabolism (ko01200)	[P]	Inorganic ion transport and metabolism	Haloacid dehalogenase-like hydrolase	Phosphoglycolate phosphatase 1A, chloroplastic OS=Arabidopsis thaliana OX=3702 GN=PGLP1A PE=1 SV=1	G	Carbohydrate transport and metabolism	2-phosphoglycolate phosphatase 1 [Arabidopsis thaliana]	molecular function: catalytic activity (GO:0003824)
AT3G14420	GLO1	104.415	6767	110.543	6546	254.896	15297	199.367	13757	9.22e-05	1.03705	up	[CIR]	Energy production and conversion;; Lipid transport and metabolism;; General function prediction only	Cellular Component: nucleus (GO:0005634);; Cellular Component: peroxisome (GO:0005777);; Molecular Function: glycolate oxidase activity (GO:0008891);; Cellular Component: plasmodesma (GO:0009506);; Cellular Component: chloroplast stroma (GO:0009570);; Molecular Function: FMN binding (GO:0010181);; Cellular Component: cytosolic ribosome (GO:0022626);; Biological Process: defense response to bacter…	K11517|1.2e-203|aly:9321110|K11517 (S)-2-hydroxy-acid oxidase [EC:1.1.3.15] | (RefSeq) peroxisomal (S)-2-hydroxy-acid oxidase GLO1 isoform X1	Glyoxylate and dicarboxylate metabolism (ko00630);; Carbon metabolism (ko01200);; Peroxisome (ko04146)	[C]	Energy production and conversion	FMN-dependent dehydrogenase	(S)-2-hydroxy-acid oxidase GLO1 OS=Arabidopsis thaliana OX=3702 GN=GLO1 PE=1 SV=1	C	Energy production and conversion	Aldolase-type TIM barrel family protein [Arabidopsis thaliana]	cellular component: intracellular (GO:0005622);; cellular component: cellular anatomical entity (GO:0110165);; biological process: metabolic process (GO:0008152);; molecular function: catalytic activity (GO:0003824);; molecular function: binding (GO:0005488);; biological process: interspecies interaction between organisms (GO:0044419);; biological process: response to stimulus (GO:0050896);; biol…
AT5G04140	GLU1	18.0965	3937	16.2877	3318	48.0577	9910	29.8102	6918	0.00250595	1.12786	up	[E]	Amino acid transport and metabolism	Biological Process: glutamate biosynthetic process (GO:0006537);; Molecular Function: glutamate synthase activity (GO:0015930);;	K00284|0.0e+00|ath:AT5G04140|K00284 glutamate synthase (ferredoxin) [EC:1.4.7.1] | (RefSeq) GLU1; glutamate synthase 1	Glyoxylate and dicarboxylate metabolism (ko00630);; Nitrogen metabolism (ko00910)	[E]	Amino acid transport and metabolism	Glutamine amidotransferases class-II	Ferredoxin-dependent glutamate synthase 1, chloroplastic/mitochondrial OS=Arabidopsis thaliana OX=3702 GN=GLU1 PE=1 SV=3	E	Amino acid transport and metabolism	glutamate synthase 1 [Arabidopsis thaliana]	biological process: metabolic process (GO:0008152);; biological process: cellular process (GO:0009987);; molecular function: catalytic activity (GO:0003824)
AT2G46820	CURT1B	79.3075	3827	82.9775	3603	166.708	7438	131.82	6523	0.00636521	0.822107	up	[J]	Translation, ribosomal structure and biogenesis	Cellular Component: thylakoid (GO:0009579);;	K01092|7.1e-10|boe:106307850|K01092 myo-inositol-1(or 4)-monophosphatase [EC:3.1.3.25] | (RefSeq) phosphatase IMPL1, chloroplastic-like isoform X1	Inositol phosphate metabolism (ko00562);; Phosphatidylinositol signaling system (ko04070)	--	--	CAAD domains of cyanobacterial aminoacyl-tRNA synthetase	Protein CURVATURE THYLAKOID 1B, chloroplastic OS=Arabidopsis thaliana OX=3702 GN=CURT1B PE=1 SV=2	S	Function unknown	photosystem I P subunit [Arabidopsis thaliana]	cellular component: cellular anatomical entity (GO:0110165)
AT4G01150	CURT1A	109.23	3921	140.231	4532	276.518	9218	242.532	9248	0.00492795	1.03129	up	--	--	Cellular Component: thylakoid (GO:0009579);; Cellular Component: integral component of membrane (GO:0016021);;	K01092|7.9e-19|boe:106307850|K01092 myo-inositol-1(or 4)-monophosphatase [EC:3.1.3.25] | (RefSeq) phosphatase IMPL1, chloroplastic-like isoform X1	Inositol phosphate metabolism (ko00562);; Phosphatidylinositol signaling system (ko04070)	--	--	CAAD domains of cyanobacterial aminoacyl-tRNA synthetase	Protein CURVATURE THYLAKOID 1A, chloroplastic OS=Arabidopsis thaliana OX=3702 GN=CURT1A PE=1 SV=1	S	Function unknown	CURVATURE THYLAKOID 1A-like protein [Arabidopsis thaliana]	cellular component: cellular anatomical entity (GO:0110165)
AT4G09820	TT8	2.19364	185	1.64887	125	6.53461	509	4.12154	368	0.0204758	1.425	up	--	--	Molecular Function: protein dimerization activity (GO:0046983);;	K13422|1.2e-31|gra:105789352|K13422 transcription factor MYC2 | (RefSeq) transcription factor MYC4-like	MAPK signaling pathway - plant (ko04016);; Plant hormone signal transduction (ko04075)	--	--	bHLH-MYC and R2R3-MYB transcription factors N-terminal	Transcription factor TT8 OS=Arabidopsis thaliana OX=3702 GN=TT8 PE=1 SV=2	K	Transcription	basic helix-loop-helix (bHLH) DNA-binding superfamily protein [Arabidopsis thaliana]	molecular function: binding (GO:0005488)
AT4G33720	AT4G33720	0.691681	26	0.536701	18	12.8806	439	3.25647	127	0.000401375	3.5952	up	[S]	Function unknown	Cellular Component: extracellular region (GO:0005576);;	K13449|2.7e-96|ath:AT4G33720|K13449 pathogenesis-related protein 1 | (RefSeq) CAP (Cysteine-rich secretory proteins, Antigen 5, and Pathogenesis-related 1 protein) superfamily protein	MAPK signaling pathway - plant (ko04016);; Plant hormone signal transduction (ko04075);; Plant-pathogen interaction (ko04626)	[S]	Function unknown	Cysteine-rich secretory protein family	Pathogenesis-related protein 1 OS=Arabidopsis thaliana OX=3702 GN=PRB1 PE=2 SV=1	S	Function unknown	CAP (Cysteine-rich secretory proteins, Antigen 5, and Pathogenesis-related 1 protein) superfamily protein [Arabidopsis thaliana]	cellular component: cellular anatomical entity (GO:0110165)
AT5G14740	BCA2	15.564	858	39.0341	2012	123.654	6910	96.9066	5710	0.00430112	2.00451	up	[P]	Inorganic ion transport and metabolism	Molecular Function: carbonate dehydratase activity (GO:0004089);; Molecular Function: zinc ion binding (GO:0008270);;	K01673|1.3e-145|ath:AT5G14740|K01673 carbonic anhydrase [EC:4.2.1.1] | (RefSeq) CA2; carbonic anhydrase 2	Nitrogen metabolism (ko00910)	[P]	Inorganic ion transport and metabolism	Carbonic anhydrase	Beta carbonic anhydrase 2, chloroplastic OS=Arabidopsis thaliana OX=3702 GN=BCA2 PE=1 SV=3	P	Inorganic ion transport and metabolism	carbonic anhydrase 2 [Arabidopsis thaliana]	molecular function: catalytic activity (GO:0003824);; molecular function: binding (GO:0005488)
AT3G05180	AT3G05180	2.58282	156	2.94458	160	11.3822	635	6.2669	400	0.00643618	1.61496	up	--	--	Molecular Function: hydrolase activity, acting on ester bonds (GO:0016788);;	K01206|9.6e-76|thj:104825554|K01206 alpha-L-fucosidase [EC:3.2.1.51] | (RefSeq) alpha-L-fucosidase 3	Other glycan degradation (ko00511)	--	--	GDSL-like Lipase/Acylhydrolase	GDSL esterase/lipase At3g05180 OS=Arabidopsis thaliana OX=3702 GN=At3g05180 PE=2 SV=1	G	Carbohydrate transport and metabolism	GDSL-like Lipase/Acylhydrolase superfamily protein [Arabidopsis thaliana]	molecular function: catalytic activity (GO:0003824)
AT4G32260	AT4G32260	156.556	7317	154.11	6474	273.609	11867	216.66	10756	0.048983	0.62985	up	--	--	Cellular Component: plasma membrane (GO:0005886);; Cellular Component: chloroplast (GO:0009507);; Cellular Component: chloroplast thylakoid (GO:0009534);; Cellular Component: chloroplast thylakoid membrane (GO:0009535);; Cellular Component: thylakoid (GO:0009579);; Cellular Component: chloroplast envelope (GO:0009941);; Molecular Function: proton transmembrane transporter activity (GO:0015078);; …	K02109|5.3e-87|ath:AT4G32260|K02109 F-type H+-transporting ATPase subunit b | (RefSeq) PDE334; ATPase, F0 complex, subunit B/B', bacterial/chloroplast	Oxidative phosphorylation (ko00190);; Photosynthesis (ko00195)	--	--	ATP synthase B/B' CF(0)	ATP synthase subunit b', chloroplastic OS=Spinacia oleracea OX=3562 GN=ATPF2 PE=1 SV=2	U	Intracellular trafficking, secretion, and vesicular transport	ATPase, F0 complex, subunit B/B', bacterial/chloroplast [Arabidopsis thaliana]	cellular component: cellular anatomical entity (GO:0110165);; cellular component: intracellular (GO:0005622);; biological process: cellular process (GO:0009987);; biological process: localization (GO:0051179);; molecular function: transporter activity (GO:0005215);; biological process: metabolic process (GO:0008152);; molecular function: catalytic activity (GO:0003824);; molecular function: bindi…
NewGene_385	--	13.6477	908	10.194	610	5.59471	346	3.1994	227	0.00598525	-1.48103	down	--	--	Molecular Function: nucleic acid binding (GO:0003676);; Molecular Function: zinc ion binding (GO:0008270);; Biological Process: DNA integration (GO:0015074);;	K12447|5.46e-33|csat:109127935|K12447 UDP-sugar pyrophosphorylase [EC:2.7.7.64] | (RefSeq) uncharacterized protein LOC109127935	Pentose and glucuronate interconversions (ko00040);; Galactose metabolism (ko00052);; Ascorbate and aldarate metabolism (ko00053);; Amino sugar and nucleotide sugar metabolism (ko00520)	[R]	General function prediction only	Retrotransposon gag protein	--	L	Replication, recombination and repair	PREDICTED: uncharacterized protein LOC104743928 [Camelina sativa]	molecular function: binding (GO:0005488);; biological process: metabolic process (GO:0008152);; biological process: cellular process (GO:0009987)
AT4G39330	CAD9	24.2454	1399	30.2112	1567	74.0509	3965	43.3329	2656	0.0408217	1.05767	up	[G]	Carbohydrate transport and metabolism	Molecular Function: zinc ion binding (GO:0008270);; Molecular Function: oxidoreductase activity (GO:0016491);;	K00083|2.2e-210|ath:AT4G39330|K00083 cinnamyl-alcohol dehydrogenase [EC:1.1.1.195] | (RefSeq) CAD9; cinnamyl alcohol dehydrogenase 9	Phenylpropanoid biosynthesis (ko00940)	[Q]	Secondary metabolites biosynthesis, transport and catabolism	Alcohol dehydrogenase GroES-like domain	Probable cinnamyl alcohol dehydrogenase 9 OS=Arabidopsis thaliana OX=3702 GN=CAD9 PE=2 SV=2	C	Energy production and conversion	cinnamyl alcohol dehydrogenase 9 [Arabidopsis thaliana]	molecular function: binding (GO:0005488);; molecular function: catalytic activity (GO:0003824)
AT4G15390	AT4G15390	4.21704	305	4.63878	302	45.3754	3043	6.89169	529	0.0361794	2.44557	up	--	--	Molecular Function: transferase activity, transferring acyl groups other than amino-acyl groups (GO:0016747);;	K13065|1.7e-71|mdm:103403343|K13065 shikimate O-hydroxycinnamoyltransferase [EC:2.3.1.133] | (RefSeq) deacetylvindoline O-acetyltransferase-like	Phenylpropanoid biosynthesis (ko00940);; Flavonoid biosynthesis (ko00941);; Stilbenoid, diarylheptanoid and gingerol biosynthesis (ko00945)	--	--	Transferase family	BAHD acyltransferase At5g47980 OS=Arabidopsis thaliana OX=3702 GN=BAHD1 PE=2 SV=1	--	--	HXXXD-type acyl-transferase family protein [Arabidopsis thaliana]	molecular function: catalytic activity (GO:0003824)
AT4G24510	CER2	3.16029	216	2.84525	175	10.3539	655	5.47907	397	0.0457239	1.34167	up	--	--	Molecular Function: transferase activity, transferring acyl groups other than amino-acyl groups (GO:0016747);;	K13065|1.5e-13|mesc:110616780|K13065 shikimate O-hydroxycinnamoyltransferase [EC:2.3.1.133] | (RefSeq) shikimate O-hydroxycinnamoyltransferase-like	Phenylpropanoid biosynthesis (ko00940);; Flavonoid biosynthesis (ko00941);; Stilbenoid, diarylheptanoid and gingerol biosynthesis (ko00945)	--	--	Transferase family	Protein ECERIFERUM 2 OS=Arabidopsis thaliana OX=3702 GN=CER2 PE=1 SV=1	S	Function unknown	HXXXD-type acyl-transferase family protein [Arabidopsis thaliana]	molecular function: catalytic activity (GO:0003824)
AT4G10340	LHCB5	176.014	10229	228.018	11911	513.258	27680	316.03	19509	0.040896	0.989576	up	--	--	Cellular Component: photosystem I (GO:0009522);; Cellular Component: photosystem II (GO:0009523);; Cellular Component: chloroplast thylakoid membrane (GO:0009535);; Biological Process: photosynthesis, light harvesting (GO:0009765);; Cellular Component: integral component of membrane (GO:0016021);; Molecular Function: chlorophyll binding (GO:0016168);; Biological Process: protein-chromophore linka…	K08916|1.2e-160|ath:AT4G10340|K08916 light-harvesting complex II chlorophyll a/b binding protein 5 | (RefSeq) LHCB5; light harvesting complex of photosystem II 5	Photosynthesis - antenna proteins (ko00196)	--	--	Chlorophyll A-B binding protein	Chlorophyll a-b binding protein CP26, chloroplastic OS=Arabidopsis thaliana OX=3702 GN=LHCB5 PE=1 SV=1	S	Function unknown	light harvesting complex of photosystem II 5 [Arabidopsis thaliana]	cellular component: intracellular (GO:0005622);; cellular component: protein-containing complex (GO:0032991);; cellular component: cellular anatomical entity (GO:0110165);; biological process: metabolic process (GO:0008152);; biological process: cellular process (GO:0009987);; molecular function: binding (GO:0005488)
AT2G34430	LHB1B1	2.32991	128	7.66743	379	34.0344	1734	35.0299	2043	0.000373773	2.76283	up	--	--	Cellular Component: photosystem I (GO:0009522);; Cellular Component: photosystem II (GO:0009523);; Cellular Component: chloroplast thylakoid membrane (GO:0009535);; Biological Process: photosynthesis, light harvesting (GO:0009765);; Cellular Component: integral component of membrane (GO:0016021);; Molecular Function: chlorophyll binding (GO:0016168);; Biological Process: protein-chromophore linka…	K08912|2.6e-152|ath:AT2G34430|K08912 light-harvesting complex II chlorophyll a/b binding protein 1 | (RefSeq) LHB1B1; light-harvesting chlorophyll-protein complex II subunit B1	Photosynthesis - antenna proteins (ko00196)	--	--	Chlorophyll A-B binding protein	Chlorophyll a-b binding protein 1, chloroplastic OS=Sinapis alba OX=3728 GN=CAB1 PE=3 SV=1	J	Translation, ribosomal structure and biogenesis	light-harvesting chlorophyll-protein complex II subunit B1 [Arabidopsis thaliana]	cellular component: intracellular (GO:0005622);; cellular component: protein-containing complex (GO:0032991);; cellular component: cellular anatomical entity (GO:0110165);; biological process: metabolic process (GO:0008152);; biological process: cellular process (GO:0009987);; molecular function: binding (GO:0005488)
AT1G15820	LHCB6	191.82	9663	243.823	11040	482.042	22534	404.653	21652	0.00486051	0.997518	up	--	--	Cellular Component: nucleus (GO:0005634);; Biological Process: response to light stimulus (GO:0009416);; Cellular Component: chloroplast (GO:0009507);; Cellular Component: photosystem I (GO:0009522);; Cellular Component: chloroplast thylakoid (GO:0009534);; Cellular Component: chloroplast thylakoid membrane (GO:0009535);; Cellular Component: thylakoid (GO:0009579);; Biological Process: photosynth…	K08917|7.0e-147|ath:AT1G15820|K08917 light-harvesting complex II chlorophyll a/b binding protein 6 | (RefSeq) LHCB6; light harvesting complex photosystem II subunit 6	Photosynthesis - antenna proteins (ko00196)	--	--	Chlorophyll A-B binding protein	Chlorophyll a-b binding protein CP24 10B, chloroplastic OS=Solanum lycopersicum OX=4081 GN=CAP10B PE=3 SV=1	S	Function unknown	light harvesting complex photosystem II subunit 6 [Arabidopsis thaliana]	cellular component: intracellular (GO:0005622);; cellular component: cellular anatomical entity (GO:0110165);; biological process: response to stimulus (GO:0050896);; cellular component: protein-containing complex (GO:0032991);; biological process: metabolic process (GO:0008152);; biological process: cellular process (GO:0009987);; molecular function: binding (GO:0005488)
AT3G61470	LHCA2	220.866	13011	220.932	11698	448.602	24524	431.824	27021	0.000398266	0.978942	up	--	--	Cellular Component: photosystem I (GO:0009522);; Cellular Component: photosystem II (GO:0009523);; Cellular Component: chloroplast thylakoid membrane (GO:0009535);; Biological Process: photosynthesis, light harvesting (GO:0009765);; Cellular Component: integral component of membrane (GO:0016021);; Molecular Function: chlorophyll binding (GO:0016168);; Biological Process: protein-chromophore linka…	K08908|7.2e-152|ath:AT3G61470|K08908 light-harvesting complex I chlorophyll a/b binding protein 2 | (RefSeq) LHCA2; photosystem I light harvesting complex protein	Photosynthesis - antenna proteins (ko00196)	--	--	Chlorophyll A-B binding protein	Photosystem I chlorophyll a/b-binding protein 2, chloroplastic OS=Arabidopsis thaliana OX=3702 GN=LHCA2 PE=1 SV=1	S	Function unknown	photosystem I light harvesting complex protein [Arabidopsis thaliana]	cellular component: intracellular (GO:0005622);; cellular component: protein-containing complex (GO:0032991);; cellular component: cellular anatomical entity (GO:0110165);; biological process: metabolic process (GO:0008152);; biological process: cellular process (GO:0009987);; molecular function: binding (GO:0005488)
AT2G34420	LHB1B2	762.297	33327	877.223	34473	1850.1	75065	1439.59	66856	0.00106263	0.973265	up	--	--	Cellular Component: endoplasmic reticulum (GO:0005783);; Biological Process: response to light stimulus (GO:0009416);; Cellular Component: chloroplast (GO:0009507);; Cellular Component: photosystem I (GO:0009522);; Cellular Component: photosystem II (GO:0009523);; Cellular Component: chloroplast thylakoid (GO:0009534);; Cellular Component: chloroplast thylakoid membrane (GO:0009535);; Cellular Co…	K08912|7.5e-152|ath:AT2G34420|K08912 light-harvesting complex II chlorophyll a/b binding protein 1 | (RefSeq) LHB1B2; photosystem II light harvesting complex protein B1B2	Photosynthesis - antenna proteins (ko00196)	--	--	Chlorophyll A-B binding protein	Chlorophyll a-b binding protein 1, chloroplastic OS=Arabidopsis thaliana OX=3702 GN=LHCB1.3 PE=1 SV=1	J	Translation, ribosomal structure and biogenesis	photosystem II light harvesting complex protein B1B2 [Arabidopsis thaliana]	cellular component: intracellular (GO:0005622);; cellular component: cellular anatomical entity (GO:0110165);; biological process: response to stimulus (GO:0050896);; cellular component: protein-containing complex (GO:0032991);; biological process: metabolic process (GO:0008152);; biological process: cellular process (GO:0009987);; molecular function: binding (GO:0005488)
AT1G61520	LHCA3	255.888	14373	273.749	13820	520.763	27137	410.6	24495	0.00693326	0.784414	up	--	--	Cellular Component: photosystem I (GO:0009522);; Cellular Component: photosystem II (GO:0009523);; Cellular Component: chloroplast thylakoid membrane (GO:0009535);; Biological Process: photosynthesis, light harvesting (GO:0009765);; Cellular Component: integral component of membrane (GO:0016021);; Molecular Function: chlorophyll binding (GO:0016168);; Biological Process: protein-chromophore linka…	K08909|3.3e-155|ath:AT1G61520|K08909 light-harvesting complex I chlorophyll a/b binding protein 3 | (RefSeq) LHCA3; PSI type III chlorophyll a/b-binding protein	Photosynthesis - antenna proteins (ko00196)	--	--	Chlorophyll A-B binding protein	Photosystem I chlorophyll a/b-binding protein 3-1, chloroplastic OS=Arabidopsis thaliana OX=3702 GN=LHCA3 PE=1 SV=1	S	Function unknown	PSI type III chlorophyll a/b-binding protein [Arabidopsis thaliana]	cellular component: intracellular (GO:0005622);; cellular component: protein-containing complex (GO:0032991);; cellular component: cellular anatomical entity (GO:0110165);; biological process: metabolic process (GO:0008152);; biological process: cellular process (GO:0009987);; molecular function: binding (GO:0005488)
AT5G01530	LHCB4.1	201.146	11748	228.196	11980	495.964	26882	336.893	20901	0.0111201	0.915981	up	--	--	Cellular Component: photosystem I (GO:0009522);; Cellular Component: photosystem II (GO:0009523);; Cellular Component: chloroplast thylakoid membrane (GO:0009535);; Biological Process: photosynthesis, light harvesting (GO:0009765);; Cellular Component: integral component of membrane (GO:0016021);; Molecular Function: chlorophyll binding (GO:0016168);; Biological Process: protein-chromophore linka…	K08915|8.4e-165|ath:AT5G01530|K08915 light-harvesting complex II chlorophyll a/b binding protein 4 | (RefSeq) LHCB4.1; light harvesting complex photosystem II	Photosynthesis - antenna proteins (ko00196)	--	--	Chlorophyll A-B binding protein	Chlorophyll a-b binding protein CP29.1, chloroplastic OS=Arabidopsis thaliana OX=3702 GN=LHCB4.1 PE=1 SV=1	I	Lipid transport and metabolism	light harvesting complex photosystem II [Arabidopsis thaliana]	cellular component: intracellular (GO:0005622);; cellular component: protein-containing complex (GO:0032991);; cellular component: cellular anatomical entity (GO:0110165);; biological process: metabolic process (GO:0008152);; biological process: cellular process (GO:0009987);; molecular function: binding (GO:0005488)
AT1G29910	LHCB1.1	58.8539	3012	120.626	5548	499.882	23737	225.121	12236	0.00440999	1.94208	up	--	--	Cellular Component: photosystem I (GO:0009522);; Cellular Component: photosystem II (GO:0009523);; Cellular Component: chloroplast thylakoid membrane (GO:0009535);; Biological Process: photosynthesis, light harvesting (GO:0009765);; Cellular Component: integral component of membrane (GO:0016021);; Molecular Function: chlorophyll binding (GO:0016168);; Biological Process: protein-chromophore linka…	K08912|2.6e-152|ath:AT1G29910|K08912 light-harvesting complex II chlorophyll a/b binding protein 1 | (RefSeq) CAB3; chlorophyll A/B binding protein 3	Photosynthesis - antenna proteins (ko00196)	--	--	Chlorophyll A-B binding protein	Chlorophyll a-b binding protein 2, chloroplastic OS=Arabidopsis thaliana OX=3702 GN=LHCB1.1 PE=1 SV=1	J	Translation, ribosomal structure and biogenesis	chlorophyll A/B binding protein 3 [Arabidopsis thaliana]	cellular component: intracellular (GO:0005622);; cellular component: protein-containing complex (GO:0032991);; cellular component: cellular anatomical entity (GO:0110165);; biological process: metabolic process (GO:0008152);; biological process: cellular process (GO:0009987);; molecular function: binding (GO:0005488)
AT3G08940	LHCB4.2	28.9583	1546	57.4279	2746	195.137	9621	109.004	6149	0.00479235	1.75337	up	--	--	Cellular Component: photosystem I (GO:0009522);; Cellular Component: photosystem II (GO:0009523);; Cellular Component: chloroplast thylakoid membrane (GO:0009535);; Biological Process: photosynthesis, light harvesting (GO:0009765);; Cellular Component: integral component of membrane (GO:0016021);; Molecular Function: chlorophyll binding (GO:0016168);; Biological Process: protein-chromophore linka…	K08915|2.3e-162|ath:AT3G08940|K08915 light-harvesting complex II chlorophyll a/b binding protein 4 | (RefSeq) LHCB4.2; light harvesting complex photosystem II	Photosynthesis - antenna proteins (ko00196)	--	--	Chlorophyll A-B binding protein	Chlorophyll a-b binding protein CP29.2, chloroplastic OS=Arabidopsis thaliana OX=3702 GN=LHCB4.2 PE=1 SV=1	I	Lipid transport and metabolism	light harvesting complex photosystem II [Arabidopsis thaliana]	cellular component: intracellular (GO:0005622);; cellular component: protein-containing complex (GO:0032991);; cellular component: cellular anatomical entity (GO:0110165);; biological process: metabolic process (GO:0008152);; biological process: cellular process (GO:0009987);; molecular function: binding (GO:0005488)
AT1G19150	LHCA6	1.67113	82	3.27074	143	18.3177	827	7.07191	366	0.00835944	2.27979	up	--	--	Cellular Component: photosystem I (GO:0009522);; Cellular Component: photosystem II (GO:0009523);; Cellular Component: chloroplast thylakoid membrane (GO:0009535);; Biological Process: photosynthesis, light harvesting (GO:0009765);; Cellular Component: integral component of membrane (GO:0016021);; Molecular Function: chlorophyll binding (GO:0016168);; Biological Process: protein-chromophore linka…	K08908|1.5e-160|ath:AT1G19150|K08908 light-harvesting complex I chlorophyll a/b binding protein 2 | (RefSeq) Lhca6; PSI type II chlorophyll a/b-binding protein (Lhca2*1)	Photosynthesis - antenna proteins (ko00196)	--	--	Chlorophyll A-B binding protein	Photosystem I chlorophyll a/b-binding protein 6, chloroplastic OS=Arabidopsis thaliana OX=3702 GN=LHCA6 PE=1 SV=1	S	Function unknown	PSI type II chlorophyll a/b-binding protein (Lhca2*1) [Arabidopsis thaliana]	cellular component: intracellular (GO:0005622);; cellular component: protein-containing complex (GO:0032991);; cellular component: cellular anatomical entity (GO:0110165);; biological process: metabolic process (GO:0008152);; biological process: cellular process (GO:0009987);; molecular function: binding (GO:0005488)
AT5G54270	LHCB3	213.277	11083	255.532	11935	526.602	25394	365.048	20150	0.0221231	0.888136	up	--	--	Cellular Component: photosystem I (GO:0009522);; Cellular Component: photosystem II (GO:0009523);; Cellular Component: chloroplast thylakoid membrane (GO:0009535);; Biological Process: photosynthesis, light harvesting (GO:0009765);; Cellular Component: integral component of membrane (GO:0016021);; Molecular Function: chlorophyll binding (GO:0016168);; Biological Process: protein-chromophore linka…	K08914|9.4e-155|ath:AT5G54270|K08914 light-harvesting complex II chlorophyll a/b binding protein 3 | (RefSeq) LHCB3; light-harvesting chlorophyll B-binding protein 3	Photosynthesis - antenna proteins (ko00196)	--	--	Chlorophyll A-B binding protein	Chlorophyll a-b binding protein 3, chloroplastic OS=Arabidopsis thaliana OX=3702 GN=LHCB3 PE=1 SV=1	S	Function unknown	light-harvesting chlorophyll B-binding protein 3 [Arabidopsis thaliana]	cellular component: intracellular (GO:0005622);; cellular component: protein-containing complex (GO:0032991);; cellular component: cellular anatomical entity (GO:0110165);; biological process: metabolic process (GO:0008152);; biological process: cellular process (GO:0009987);; molecular function: binding (GO:0005488)
AT1G29930	LHCB1.3	799.063	41119	1025.56	47437	2092.98	99952	1715.91	93796	0.00325244	1.03237	up	--	--	Cellular Component: photosystem I (GO:0009522);; Cellular Component: photosystem II (GO:0009523);; Cellular Component: chloroplast thylakoid membrane (GO:0009535);; Biological Process: photosynthesis, light harvesting (GO:0009765);; Cellular Component: integral component of membrane (GO:0016021);; Molecular Function: chlorophyll binding (GO:0016168);; Biological Process: protein-chromophore linka…	K08912|3.4e-152|ath:AT1G29930|K08912 light-harvesting complex II chlorophyll a/b binding protein 1 | (RefSeq) CAB1; chlorophyll A/B binding protein 1	Photosynthesis - antenna proteins (ko00196)	--	--	Chlorophyll A-B binding protein	Chlorophyll a-b binding protein 1, chloroplastic OS=Arabidopsis thaliana OX=3702 GN=LHCB1.3 PE=1 SV=1	J	Translation, ribosomal structure and biogenesis	chlorophyll A/B binding protein 1 [Arabidopsis thaliana]	cellular component: intracellular (GO:0005622);; cellular component: protein-containing complex (GO:0032991);; cellular component: cellular anatomical entity (GO:0110165);; biological process: metabolic process (GO:0008152);; biological process: cellular process (GO:0009987);; molecular function: binding (GO:0005488)
AT3G54890	LHCA1	212.536	10528	228.334	10159	538.59	24733	395.374	20790	0.000186193	1.04802	up	--	--	Cellular Component: photosystem I (GO:0009522);; Cellular Component: photosystem II (GO:0009523);; Cellular Component: chloroplast thylakoid membrane (GO:0009535);; Biological Process: photosynthesis, light harvesting (GO:0009765);; Cellular Component: integral component of membrane (GO:0016021);; Molecular Function: chlorophyll binding (GO:0016168);; Biological Process: protein-chromophore linka…	K08907|6.7e-111|ath:AT3G54890|K08907 light-harvesting complex I chlorophyll a/b binding protein 1 | (RefSeq) LHCA1; chlorophyll a-b binding protein 6	Photosynthesis - antenna proteins (ko00196)	--	--	Chlorophyll A-B binding protein	Chlorophyll a-b binding protein 6, chloroplastic OS=Arabidopsis thaliana OX=3702 GN=LHCA1 PE=1 SV=1	O	Posttranslational modification, protein turnover, chaperones	chlorophyll a-b binding protein 6 [Arabidopsis thaliana]	cellular component: intracellular (GO:0005622);; cellular component: protein-containing complex (GO:0032991);; cellular component: cellular anatomical entity (GO:0110165);; biological process: metabolic process (GO:0008152);; biological process: cellular process (GO:0009987);; molecular function: binding (GO:0005488)
AT2G05100	LHCB2.1	209.07	12216	254.919	13452	451.462	24556	381.453	23723	0.0276599	0.817134	up	--	--	Cellular Component: photosystem I (GO:0009522);; Cellular Component: photosystem II (GO:0009523);; Cellular Component: chloroplast thylakoid membrane (GO:0009535);; Biological Process: photosynthesis, light harvesting (GO:0009765);; Cellular Component: integral component of membrane (GO:0016021);; Molecular Function: chlorophyll binding (GO:0016168);; Biological Process: protein-chromophore linka…	K08913|2.7e-154|ath:AT2G05100|K08913 light-harvesting complex II chlorophyll a/b binding protein 2 | (RefSeq) LHCB2.1; photosystem II light harvesting complex protein 2.1	Photosynthesis - antenna proteins (ko00196)	--	--	Chlorophyll A-B binding protein	Chlorophyll a-b binding protein 2.1, chloroplastic OS=Arabidopsis thaliana OX=3702 GN=LHCB2.1 PE=1 SV=1	J	Translation, ribosomal structure and biogenesis	photosystem II light harvesting complex protein 2.1 [Arabidopsis thaliana]	cellular component: intracellular (GO:0005622);; cellular component: protein-containing complex (GO:0032991);; cellular component: cellular anatomical entity (GO:0110165);; biological process: metabolic process (GO:0008152);; biological process: cellular process (GO:0009987);; molecular function: binding (GO:0005488)
AT1G29920	LHCB1.1	135.801	7466	280.838	13877	646.577	32987	581.103	33934	0.0118933	1.53004	up	--	--	Cellular Component: photosystem I (GO:0009522);; Cellular Component: photosystem II (GO:0009523);; Cellular Component: chloroplast thylakoid membrane (GO:0009535);; Biological Process: photosynthesis, light harvesting (GO:0009765);; Cellular Component: integral component of membrane (GO:0016021);; Molecular Function: chlorophyll binding (GO:0016168);; Biological Process: protein-chromophore linka…	K08912|2.6e-152|ath:AT1G29910|K08912 light-harvesting complex II chlorophyll a/b binding protein 1 | (RefSeq) CAB3; chlorophyll A/B binding protein 3	Photosynthesis - antenna proteins (ko00196)	--	--	Chlorophyll A-B binding protein	Chlorophyll a-b binding protein 2, chloroplastic OS=Arabidopsis thaliana OX=3702 GN=LHCB1.1 PE=1 SV=1	J	Translation, ribosomal structure and biogenesis	chlorophyll A/B binding protein 3 [Arabidopsis thaliana]	cellular component: intracellular (GO:0005622);; cellular component: protein-containing complex (GO:0032991);; cellular component: cellular anatomical entity (GO:0110165);; biological process: metabolic process (GO:0008152);; biological process: cellular process (GO:0009987);; molecular function: binding (GO:0005488)
AT2G05070	LHCB2.2	98.8642	4728	156.153	6712	326.398	14485	271.584	13796	0.0125726	1.19861	up	--	--	Cellular Component: photosystem I (GO:0009522);; Cellular Component: photosystem II (GO:0009523);; Cellular Component: chloroplast thylakoid membrane (GO:0009535);; Biological Process: photosynthesis, light harvesting (GO:0009765);; Cellular Component: integral component of membrane (GO:0016021);; Molecular Function: chlorophyll binding (GO:0016168);; Biological Process: protein-chromophore linka…	K08913|3.6e-154|ath:AT2G05070|K08913 light-harvesting complex II chlorophyll a/b binding protein 2 | (RefSeq) LHCB2.2; photosystem II light harvesting complex protein 2.2	Photosynthesis - antenna proteins (ko00196)	--	--	Chlorophyll A-B binding protein	Chlorophyll a-b binding protein 2.2, chloroplastic OS=Arabidopsis thaliana OX=3702 GN=LHCB2.2 PE=1 SV=1	J	Translation, ribosomal structure and biogenesis	photosystem II light harvesting complex protein 2.2 [Arabidopsis thaliana]	cellular component: intracellular (GO:0005622);; cellular component: protein-containing complex (GO:0032991);; cellular component: cellular anatomical entity (GO:0110165);; biological process: metabolic process (GO:0008152);; biological process: cellular process (GO:0009987);; molecular function: binding (GO:0005488)
AT1G30380	PSAK	231.404	7445	247.304	7152	456.506	13630	432.139	14769	0.00430112	0.874689	up	--	--	Cellular Component: photosystem I (GO:0009522);; Biological Process: photosynthesis (GO:0015979);;	K02698|5.8e-65|ath:AT1G30380|K02698 photosystem I subunit X | (RefSeq) PSAK; photosystem I subunit K	Photosynthesis (ko00195)	--	--	Photosystem I psaG / psaK	Photosystem I reaction center subunit psaK, chloroplastic OS=Arabidopsis thaliana OX=3702 GN=PSAK PE=2 SV=2	S	Function unknown	photosystem I subunit K [Arabidopsis thaliana]	cellular component: intracellular (GO:0005622);; cellular component: protein-containing complex (GO:0032991);; cellular component: cellular anatomical entity (GO:0110165);; biological process: metabolic process (GO:0008152);; biological process: cellular process (GO:0009987)
AT4G05180	PSBQ2	58.4208	2628	67.4199	2726	157.92	6592	105.057	5020	0.00643618	1.02191	up	--	--	Molecular Function: calcium ion binding (GO:0005509);; Cellular Component: photosystem II oxygen evolving complex (GO:0009654);; Biological Process: photosynthesis (GO:0015979);; Cellular Component: extrinsic component of membrane (GO:0019898);;	K08901|7.7e-121|ath:AT4G05180|K08901 photosystem II oxygen-evolving enhancer protein 3 | (RefSeq) PSBQ-2; photosystem II subunit Q-2	Photosynthesis (ko00195)	--	--	Oxygen evolving enhancer protein 3 (PsbQ)	Oxygen-evolving enhancer protein 3-2, chloroplastic OS=Arabidopsis thaliana OX=3702 GN=PSBQ2 PE=1 SV=2	S	Function unknown	photosystem II subunit Q-2 [Arabidopsis thaliana]	molecular function: binding (GO:0005488);; cellular component: protein-containing complex (GO:0032991);; cellular component: cellular anatomical entity (GO:0110165);; biological process: metabolic process (GO:0008152);; biological process: cellular process (GO:0009987)
AT5G66570	PSBO1	358.592	22624	377.994	21436	705.578	41312	592.247	39691	0.00419633	0.791749	up	--	--	Cellular Component: photosystem II oxygen evolving complex (GO:0009654);; Biological Process: photosystem II assembly (GO:0010207);; Molecular Function: oxygen evolving activity (GO:0010242);; Biological Process: photosystem II stabilization (GO:0042549);;	K02716|1.4e-184|ath:AT5G66570|K02716 photosystem II oxygen-evolving enhancer protein 1 | (RefSeq) PSBO1; PS II oxygen-evolving complex 1	Photosynthesis (ko00195)	--	--	Manganese-stabilising protein / photosystem II polypeptide	Oxygen-evolving enhancer protein 1-1, chloroplastic OS=Arabidopsis thaliana OX=3702 GN=PSBO1 PE=1 SV=2	G	Carbohydrate transport and metabolism	PS II oxygen-evolving complex 1 [Arabidopsis thaliana]	cellular component: protein-containing complex (GO:0032991);; cellular component: cellular anatomical entity (GO:0110165);; biological process: cellular process (GO:0009987);; biological process: metabolic process (GO:0008152);; molecular function: catalytic activity (GO:0003824);; biological process: biological regulation (GO:0065007)
AT2G20260	PSAE2	76.4014	1941	77.5534	1771	158.946	3746	123.628	3335	0.00555129	0.845758	up	--	--	Cellular Component: photosystem I reaction center (GO:0009538);; Biological Process: photosynthesis (GO:0015979);;	K02693|1.5e-61|ath:AT2G20260|K02693 photosystem I subunit IV | (RefSeq) PSAE-2; photosystem I subunit E-2	Photosynthesis (ko00195)	--	--	Photosystem I reaction centre subunit IV / PsaE	Photosystem I reaction center subunit IV B, chloroplastic OS=Arabidopsis thaliana OX=3702 GN=PSAE2 PE=2 SV=1	C	Energy production and conversion	photosystem I subunit E-2 [Arabidopsis thaliana]	cellular component: protein-containing complex (GO:0032991);; cellular component: cellular anatomical entity (GO:0110165);; biological process: metabolic process (GO:0008152);; biological process: cellular process (GO:0009987)
AT1G03130	PSAD2	54.7761	2191	58.6491	2109	111.928	4155	97.6812	4151	0.004919	0.862998	up	--	--	Cellular Component: photosystem I reaction center (GO:0009538);; Biological Process: photosynthesis (GO:0015979);;	K02692|8.4e-111|ath:AT1G03130|K02692 photosystem I subunit II | (RefSeq) PSAD-2; photosystem I subunit D-2	Photosynthesis (ko00195)	--	--	PsaD	Photosystem I reaction center subunit II-2, chloroplastic OS=Arabidopsis thaliana OX=3702 GN=PSAD2 PE=1 SV=1	C	Energy production and conversion	photosystem I subunit D-2 [Arabidopsis thaliana]	cellular component: protein-containing complex (GO:0032991);; cellular component: cellular anatomical entity (GO:0110165);; biological process: metabolic process (GO:0008152);; biological process: cellular process (GO:0009987)
AT1G31330	PSAF	234.24	11790	226.011	10225	393.369	18374	371.936	19885	0.0236222	0.716995	up	--	--	Cellular Component: photosystem I reaction center (GO:0009538);; Biological Process: photosynthesis (GO:0015979);; Cellular Component: integral component of membrane (GO:0016021);;	K02694|9.7e-121|ath:AT1G31330|K02694 photosystem I subunit III | (RefSeq) PSAF; photosystem I subunit F	Photosynthesis (ko00195)	--	--	Photosystem I reaction centre subunit III	Photosystem I reaction center subunit III, chloroplastic OS=Arabidopsis thaliana OX=3702 GN=PSAF PE=1 SV=1	S	Function unknown	photosystem I subunit F [Arabidopsis thaliana]	cellular component: protein-containing complex (GO:0032991);; cellular component: cellular anatomical entity (GO:0110165);; biological process: metabolic process (GO:0008152);; biological process: cellular process (GO:0009987)
AT3G50820	PSBO2	97.0534	5389	123.552	6166	219.477	11308	186.457	10996	0.0336941	0.852713	up	--	--	Cellular Component: photosystem II oxygen evolving complex (GO:0009654);; Biological Process: photosystem II assembly (GO:0010207);; Molecular Function: oxygen evolving activity (GO:0010242);; Biological Process: photosystem II stabilization (GO:0042549);;	K02716|8.4e-185|ath:AT3G50820|K02716 photosystem II oxygen-evolving enhancer protein 1 | (RefSeq) PSBO2; photosystem II subunit O-2	Photosynthesis (ko00195)	--	--	Manganese-stabilising protein / photosystem II polypeptide	Oxygen-evolving enhancer protein 1-2, chloroplastic OS=Arabidopsis thaliana OX=3702 GN=PSBO2 PE=1 SV=1	G	Carbohydrate transport and metabolism	photosystem II subunit O-2 [Arabidopsis thaliana]	cellular component: protein-containing complex (GO:0032991);; cellular component: cellular anatomical entity (GO:0110165);; biological process: cellular process (GO:0009987);; biological process: metabolic process (GO:0008152);; molecular function: catalytic activity (GO:0003824);; biological process: biological regulation (GO:0065007)
AT1G44575	PSBS	158.091	8802	182.315	9108	317.565	16907	247.15	14884	0.044862	0.735216	up	--	--	Cellular Component: integral component of membrane (GO:0016021);;	K03542|1.7e-98|csat:104742172|K03542 photosystem II 22kDa protein | (RefSeq) photosystem II 22 kDa protein, chloroplastic	Photosynthesis (ko00195)	--	--	Chlorophyll A-B binding protein	Photosystem II 22 kDa protein, chloroplastic OS=Arabidopsis thaliana OX=3702 GN=PSBS PE=2 SV=1	I	Lipid transport and metabolism	Chlorophyll A-B binding family protein [Arabidopsis thaliana]	cellular component: cellular anatomical entity (GO:0110165)
AT3G16140	PSAH1	71.8072	3906	63.2535	3093	122.224	6170	111.614	6449	0.0159394	0.77404	up	--	--	Cellular Component: photosystem I reaction center (GO:0009538);; Biological Process: photosynthesis (GO:0015979);;	K02695|3.1e-75|ath:AT3G16140|K02695 photosystem I subunit VI | (RefSeq) PSAH-1; photosystem I subunit H-1	Photosynthesis (ko00195)	--	--	Photosystem I reaction centre subunit VI	Photosystem I reaction center subunit VI-1, chloroplastic OS=Arabidopsis thaliana OX=3702 GN=PSAH1 PE=2 SV=1	T	Signal transduction mechanisms	photosystem I subunit H-1 [Arabidopsis thaliana]	cellular component: protein-containing complex (GO:0032991);; cellular component: cellular anatomical entity (GO:0110165);; biological process: metabolic process (GO:0008152);; biological process: cellular process (GO:0009987)
AT4G03280	PETC	153.335	6455	158.807	6002	276.288	10778	224.006	10024	0.0411988	0.653464	up	[C]	Energy production and conversion	Cellular Component: integral component of membrane (GO:0016021);; Molecular Function: electron transporter, transferring electrons within cytochrome b6/f complex of photosystem II activity (GO:0045158);; Molecular Function: 2 iron, 2 sulfur cluster binding (GO:0051537);;	K02636|4.6e-120|ath:AT4G03280|K02636 cytochrome b6-f complex iron-sulfur subunit [EC:7.1.1.6] | (RefSeq) PETC; photosynthetic electron transfer C	Photosynthesis (ko00195)	[C]	Energy production and conversion	Rieske [2Fe-2S] domain	Cytochrome b6-f complex iron-sulfur subunit, chloroplastic OS=Arabidopsis thaliana OX=3702 GN=petC PE=1 SV=1	C	Energy production and conversion	photosynthetic electron transfer C [Arabidopsis thaliana]	cellular component: cellular anatomical entity (GO:0110165);; biological process: metabolic process (GO:0008152);; biological process: cellular process (GO:0009987);; molecular function: catalytic activity (GO:0003824);; molecular function: binding (GO:0005488)
AT4G02770	PSAD1	174.993	8303	164.405	7011	307.122	13523	273.536	13786	0.00739683	0.754584	up	--	--	Cellular Component: photosystem I reaction center (GO:0009538);; Biological Process: photosynthesis (GO:0015979);;	K02692|3.5e-112|ath:AT4G02770|K02692 photosystem I subunit II | (RefSeq) PSAD-1; photosystem I subunit D-1	Photosynthesis (ko00195)	--	--	PsaD	Photosystem I reaction center subunit II-1, chloroplastic OS=Arabidopsis thaliana OX=3702 GN=psaD1 PE=1 SV=1	C	Energy production and conversion	photosystem I subunit D-1 [Arabidopsis thaliana]	cellular component: protein-containing complex (GO:0032991);; cellular component: cellular anatomical entity (GO:0110165);; biological process: metabolic process (GO:0008152);; biological process: cellular process (GO:0009987)
AT1G55670	PSAG	156.262	5100	161.867	4748	352.583	10678	279.672	9695	0.000242164	0.962008	up	--	--	Cellular Component: photosystem I (GO:0009522);; Biological Process: photosynthesis (GO:0015979);; Cellular Component: integral component of membrane (GO:0016021);;	K08905|9.9e-83|ath:AT1G55670|K08905 photosystem I subunit V | (RefSeq) PSAG; photosystem I subunit G	Photosynthesis (ko00195)	--	--	Photosystem I psaG / psaK	Photosystem I reaction center subunit V, chloroplastic OS=Arabidopsis thaliana OX=3702 GN=PSAG PE=1 SV=1	I	Lipid transport and metabolism	photosystem I subunit G [Arabidopsis thaliana]	cellular component: intracellular (GO:0005622);; cellular component: protein-containing complex (GO:0032991);; cellular component: cellular anatomical entity (GO:0110165);; biological process: metabolic process (GO:0008152);; biological process: cellular process (GO:0009987)
AT1G08380	PSAO	204.591	7011	223.439	6882	374.37	11905	389.562	14179	0.0336941	0.823759	up	--	--	Cellular Component: integral component of membrane (GO:0016021);;	K14332|2.1e-76|ath:AT1G08380|K14332 photosystem I subunit PsaO | (RefSeq) PSAO; photosystem I subunit O	Photosynthesis (ko00195)	--	--	--	Photosystem I subunit O OS=Arabidopsis thaliana OX=3702 GN=PSAO PE=1 SV=1	S	Function unknown	photosystem I subunit O [Arabidopsis thaliana]	cellular component: cellular anatomical entity (GO:0110165)
AT3G55330	PPL1	7.75544	358	10.3456	429	24.9662	1069	20.9435	1026	0.00319223	1.31477	up	--	--	Molecular Function: calcium ion binding (GO:0005509);; Cellular Component: photosystem II oxygen evolving complex (GO:0009654);; Biological Process: photosynthesis (GO:0015979);; Cellular Component: extrinsic component of membrane (GO:0019898);;	K02717|1.2e-126|ath:AT3G55330|K02717 photosystem II oxygen-evolving enhancer protein 2 | (RefSeq) PPL1; PsbP-like protein 1	Photosynthesis (ko00195)	--	--	PsbP	PsbP-like protein 1, chloroplastic OS=Arabidopsis thaliana OX=3702 GN=PPL1 PE=1 SV=1	G	Carbohydrate transport and metabolism	PsbP-like protein 1 [Arabidopsis thaliana]	molecular function: binding (GO:0005488);; cellular component: protein-containing complex (GO:0032991);; cellular component: cellular anatomical entity (GO:0110165);; biological process: metabolic process (GO:0008152);; biological process: cellular process (GO:0009987)
AT1G06680	PSBP1	267.807	15130	308.745	15672	532.084	27902	449.205	26969	0.0311508	0.741834	up	--	--	Molecular Function: calcium ion binding (GO:0005509);; Cellular Component: photosystem II oxygen evolving complex (GO:0009654);; Biological Process: photosynthesis (GO:0015979);; Cellular Component: extrinsic component of membrane (GO:0019898);;	K02717|1.3e-140|ath:AT1G06680|K02717 photosystem II oxygen-evolving enhancer protein 2 | (RefSeq) PSBP-1; photosystem II subunit P-1	Photosynthesis (ko00195)	--	--	PsbP	Oxygen-evolving enhancer protein 2-1, chloroplastic OS=Arabidopsis thaliana OX=3702 GN=PSBP1 PE=1 SV=2	S	Function unknown	photosystem II subunit P-1 [Arabidopsis thaliana]	molecular function: binding (GO:0005488);; cellular component: protein-containing complex (GO:0032991);; cellular component: cellular anatomical entity (GO:0110165);; biological process: metabolic process (GO:0008152);; biological process: cellular process (GO:0009987)
AT2G39470	PNSL1	7.57152	331	12.9182	504	31.8762	1288	22.3032	1028	0.0311309	1.35931	up	--	--	Molecular Function: calcium ion binding (GO:0005509);; Cellular Component: photosystem II oxygen evolving complex (GO:0009654);; Biological Process: photosynthesis (GO:0015979);; Cellular Component: extrinsic component of membrane (GO:0019898);;	K02717|2.6e-34|osa:4345346|K02717 photosystem II oxygen-evolving enhancer protein 2 | (RefSeq) psbP-like protein 1, chloroplastic isoform X1	Photosynthesis (ko00195)	--	--	PsbP	Photosynthetic NDH subunit of lumenal location 1, chloroplastic OS=Arabidopsis thaliana OX=3702 GN=PNSL1 PE=1 SV=2	S	Function unknown	PsbP-like protein 2 [Arabidopsis thaliana]	molecular function: binding (GO:0005488);; cellular component: protein-containing complex (GO:0032991);; cellular component: cellular anatomical entity (GO:0110165);; biological process: metabolic process (GO:0008152);; biological process: cellular process (GO:0009987)
AT5G64040	PSAN	112.008	4771	117.01	4480	233.833	9243	227.671	10301	0.000799212	0.995187	up	--	--	Cellular Component: photosystem I (GO:0009522);; Biological Process: photosynthesis (GO:0015979);;	K02701|1.2e-91|ath:AT5G64040|K02701 photosystem I subunit PsaN | (RefSeq) PSAN; photosystem I reaction center subunit PSI-N, chloroplast, putative / PSI-N, putative (PSAN)	Photosynthesis (ko00195)	--	--	Photosystem I reaction centre subunit N (PSAN or PSI-N)	Photosystem I reaction center subunit N, chloroplastic OS=Arabidopsis thaliana OX=3702 GN=PSAN PE=1 SV=2	S	Function unknown	photosystem I reaction center subunit PSI-N, chloroplast, putative / PSI-N, putative (PSAN) [Arabidopsis thaliana]	cellular component: intracellular (GO:0005622);; cellular component: protein-containing complex (GO:0032991);; cellular component: cellular anatomical entity (GO:0110165);; biological process: metabolic process (GO:0008152);; biological process: cellular process (GO:0009987)
AT1G20340	DRT112	154.492	8707	180.889	9163	378.076	19773	270.037	16165	0.00955855	0.913271	up	[C]	Energy production and conversion	Molecular Function: copper ion binding (GO:0005507);; Molecular Function: electron transfer activity (GO:0009055);; Cellular Component: chloroplast thylakoid membrane (GO:0009535);;	K02638|1.1e-81|ath:AT1G20340|K02638 plastocyanin | (RefSeq) DRT112; Cupredoxin superfamily protein	Photosynthesis (ko00195)	--	--	Copper binding proteins, plastocyanin/azurin family	Plastocyanin major isoform, chloroplastic OS=Arabidopsis thaliana OX=3702 GN=DRT112 PE=1 SV=2	C	Energy production and conversion	Cupredoxin superfamily protein [Arabidopsis thaliana]	molecular function: binding (GO:0005488);; biological process: metabolic process (GO:0008152);; molecular function: catalytic activity (GO:0003824);; cellular component: intracellular (GO:0005622);; cellular component: cellular anatomical entity (GO:0110165)
AT1G52230	PSAH2	95.3253	2800	102.431	2705	210.122	5728	186.405	5816	0.000535172	0.981567	up	--	--	Cellular Component: photosystem I reaction center (GO:0009538);; Biological Process: photosynthesis (GO:0015979);;	K02695|8.2e-76|ath:AT1G52230|K02695 photosystem I subunit VI | (RefSeq) PSAH2; photosystem I subunit H2	Photosynthesis (ko00195)	--	--	Photosystem I reaction centre subunit VI	Photosystem I reaction center subunit VI-2, chloroplastic OS=Arabidopsis thaliana OX=3702 GN=PSAH2 PE=2 SV=1	S	Function unknown	photosystem I subunit H2 [Arabidopsis thaliana]	cellular component: protein-containing complex (GO:0032991);; cellular component: cellular anatomical entity (GO:0110165);; biological process: metabolic process (GO:0008152);; biological process: cellular process (GO:0009987)
AT2G30570	PSBW	210.042	8419	208.444	7510	373.35	13887	354.939	15112	0.010537	0.782692	up	--	--	Cellular Component: chloroplast (GO:0009507);; Cellular Component: photosystem II (GO:0009523);; Biological Process: photosynthesis (GO:0015979);; Cellular Component: integral component of membrane (GO:0016021);;	K02721|2.3e-64|ath:AT2G30570|K02721 photosystem II PsbW protein | (RefSeq) PSBW; photosystem II reaction center W	Photosynthesis (ko00195)	--	--	Photosystem II reaction centre W protein (PsbW)	Photosystem II reaction center W protein, chloroplastic OS=Arabidopsis thaliana OX=3702 GN=PSBW PE=1 SV=2	S	Function unknown	photosystem II reaction center W [Arabidopsis thaliana]	cellular component: intracellular (GO:0005622);; cellular component: cellular anatomical entity (GO:0110165);; cellular component: protein-containing complex (GO:0032991);; biological process: metabolic process (GO:0008152);; biological process: cellular process (GO:0009987)
AT4G28750	PSAE1	193.097	6447	187.047	5614	415.843	12885	374.051	13266	2.61e-05	1.03518	up	--	--	Cellular Component: photosystem I reaction center (GO:0009538);; Biological Process: photosynthesis (GO:0015979);;	K02693|1.7e-54|ath:AT4G28750|K02693 photosystem I subunit IV | (RefSeq) PSAE-1; Photosystem I reaction centre subunit IV / PsaE protein	Photosynthesis (ko00195)	--	--	Photosystem I reaction centre subunit IV / PsaE	Photosystem I reaction center subunit IV A, chloroplastic OS=Arabidopsis thaliana OX=3702 GN=PSAE1 PE=1 SV=1	C	Energy production and conversion	Photosystem I reaction centre subunit IV / PsaE protein [Arabidopsis thaliana]	cellular component: protein-containing complex (GO:0032991);; cellular component: cellular anatomical entity (GO:0110165);; biological process: metabolic process (GO:0008152);; biological process: cellular process (GO:0009987)
AT4G12800	PSAL	223.92	9952	217.268	8679	475.403	19609	369.035	17421	0.000398266	0.907179	up	--	--	Cellular Component: photosystem I reaction center (GO:0009538);; Biological Process: photosynthesis (GO:0015979);; Cellular Component: integral component of membrane (GO:0016021);;	K02699|3.8e-117|ath:AT4G12800|K02699 photosystem I subunit XI | (RefSeq) PSAL; photosystem I subunit l	Photosynthesis (ko00195)	--	--	Photosystem I reaction centre subunit XI	Photosystem I reaction center subunit XI, chloroplastic OS=Arabidopsis thaliana OX=3702 GN=PSAL PE=1 SV=2	C	Energy production and conversion	photosystem I subunit l [Arabidopsis thaliana]	cellular component: protein-containing complex (GO:0032991);; cellular component: cellular anatomical entity (GO:0110165);; biological process: metabolic process (GO:0008152);; biological process: cellular process (GO:0009987)
AT1G14150	PNSL2	2.19924	79	3.65289	118	11.4632	374	8.54267	322	0.0183768	1.71235	up	--	--	Molecular Function: calcium ion binding (GO:0005509);; Cellular Component: photosystem II oxygen evolving complex (GO:0009654);; Biological Process: photosynthesis (GO:0015979);; Cellular Component: extrinsic component of membrane (GO:0019898);;	K08901|6.4e-105|ath:AT1G14150|K08901 photosystem II oxygen-evolving enhancer protein 3 | (RefSeq) PnsL2; PsbQ-like 2	Photosynthesis (ko00195)	--	--	Oxygen evolving enhancer protein 3 (PsbQ)	Photosynthetic NDH subunit of lumenal location 2, chloroplastic OS=Arabidopsis thaliana OX=3702 GN=PNSL2 PE=1 SV=1	S	Function unknown	PsbQ-like 2 [Arabidopsis thaliana]	molecular function: binding (GO:0005488);; cellular component: protein-containing complex (GO:0032991);; cellular component: cellular anatomical entity (GO:0110165);; biological process: metabolic process (GO:0008152);; biological process: cellular process (GO:0009987)
AT4G21280	PSBQ1	69.8985	2903	93.1459	3480	179.725	6932	138.972	6137	0.0311309	0.933969	up	--	--	Molecular Function: calcium ion binding (GO:0005509);; Cellular Component: photosystem II oxygen evolving complex (GO:0009654);; Biological Process: photosynthesis (GO:0015979);; Cellular Component: extrinsic component of membrane (GO:0019898);;	K08901|3.0e-109|ath:AT4G21280|K08901 photosystem II oxygen-evolving enhancer protein 3 | (RefSeq) PSBQA; photosystem II subunit QA	Photosynthesis (ko00195)	--	--	Oxygen evolving enhancer protein 3 (PsbQ)	Oxygen-evolving enhancer protein 3-1, chloroplastic OS=Arabidopsis thaliana OX=3702 GN=PSBQ1 PE=1 SV=3	S	Function unknown	photosystem II subunit QA [Arabidopsis thaliana]	molecular function: binding (GO:0005488);; cellular component: protein-containing complex (GO:0032991);; cellular component: cellular anatomical entity (GO:0110165);; biological process: metabolic process (GO:0008152);; biological process: cellular process (GO:0009987)
AT1G79040	PSBR	633.996	20795	683.972	20165	1258.67	38314	1136.53	39599	0.0039049	0.840904	up	--	--	Cellular Component: photosystem II oxygen evolving complex (GO:0009654);; Biological Process: photosynthesis (GO:0015979);; Cellular Component: integral component of membrane (GO:0016021);;	K03541|9.0e-72|ath:AT1G79040|K03541 photosystem II 10kDa protein | (RefSeq) PSBR; photosystem II subunit R	Photosynthesis (ko00195)	--	--	Photosystem II 10 kDa polypeptide PsbR	Photosystem II 10 kDa polypeptide, chloroplastic OS=Arabidopsis thaliana OX=3702 GN=PSBR PE=1 SV=1	S	Function unknown	photosystem II subunit R [Arabidopsis thaliana]	cellular component: protein-containing complex (GO:0032991);; cellular component: cellular anatomical entity (GO:0110165);; biological process: metabolic process (GO:0008152);; biological process: cellular process (GO:0009987)
AT3G23050	IAA7	8.59638	497	8.10088	419	25.4191	1351	13.9873	865	0.0252819	1.18725	up	--	--	Cellular Component: nucleus (GO:0005634);; Biological Process: regulation of transcription, DNA-templated (GO:0006355);; Biological Process: auxin-activated signaling pathway (GO:0009734);;	K14484|1.3e-85|ath:AT3G23050|K14484 auxin-responsive protein IAA | (RefSeq) IAA7; indole-3-acetic acid 7	Plant hormone signal transduction (ko04075)	--	--	AUX/IAA family	Auxin-responsive protein IAA7 OS=Arabidopsis thaliana OX=3702 GN=IAA7 PE=1 SV=1	K	Transcription	indole-3-acetic acid 7 [Arabidopsis thaliana]	cellular component: intracellular (GO:0005622);; cellular component: cellular anatomical entity (GO:0110165);; biological process: biological regulation (GO:0065007);; biological process: cellular process (GO:0009987);; biological process: signaling (GO:0023052);; biological process: response to stimulus (GO:0050896)
AT3G59060	PIF5	10.4675	931	8.77843	693	27.7587	2106	15.3004	1402	0.0496895	1.03053	up	--	--	Molecular Function: protein dimerization activity (GO:0046983);;	K16189|1.2e-223|ath:AT3G59060|K16189 phytochrome-interacting factor 4 | (RefSeq) PIL6; phytochrome interacting factor 3-like 6	Plant hormone signal transduction (ko04075)	--	--	Helix-loop-helix DNA-binding domain	Transcription factor PIF5 OS=Arabidopsis thaliana OX=3702 GN=PIF5 PE=1 SV=1	K	Transcription	PIL6 [Arabidopsis thaliana]	molecular function: binding (GO:0005488)
AT4G19530	AT4G19530	0.88351	148	0.733014	109	2.24592	348	1.79811	319	0.0324258	1.30018	up	--	--	Biological Process: signal transduction (GO:0007165);; Molecular Function: ADP binding (GO:0043531);;	K16226|3.5e-281|csat:104760399|K16226 disease resistance protein RPS4 | (RefSeq) disease resistance protein RPS4-like	Plant-pathogen interaction (ko04626)	--	--	TIR domain	Probable disease resistance protein At4g19530 OS=Arabidopsis thaliana OX=3702 GN=At4g19530 PE=1 SV=2	--	--	disease resistance protein (TIR-NBS-LRR class) family [Arabidopsis thaliana]	biological process: cellular process (GO:0009987);; biological process: biological regulation (GO:0065007);; molecular function: binding (GO:0005488)
AT3G17700	CNGC20	2.83719	331	2.38673	250	6.79313	734	4.59379	569	0.0401045	1.08608	up	--	--	Molecular Function: ion channel activity (GO:0005216);; Cellular Component: integral component of membrane (GO:0016021);;	K05391|0.0e+00|ath:AT3G17700|K05391 cyclic nucleotide gated channel, plant | (RefSeq) CNBT1; cyclic nucleotide-binding transporter 1	Plant-pathogen interaction (ko04626)	[PT]	Inorganic ion transport and metabolism;; Signal transduction mechanisms	Ion transport protein	Probable cyclic nucleotide-gated ion channel 20, chloroplastic OS=Arabidopsis thaliana OX=3702 GN=CNGC20 PE=2 SV=1	U	Intracellular trafficking, secretion, and vesicular transport	cyclic nucleotide-binding transporter 1 [Arabidopsis thaliana]	biological process: cellular process (GO:0009987);; biological process: localization (GO:0051179);; molecular function: transporter activity (GO:0005215);; cellular component: cellular anatomical entity (GO:0110165)
AT5G13630	CHLH	50.5077	10045	53.9135	9637	88.3339	16301	84.0491	17753	0.0453999	0.705609	up	[H]	Coenzyme transport and metabolism	Biological Process: chlorophyll biosynthetic process (GO:0015995);; Molecular Function: magnesium chelatase activity (GO:0016851);;	K03403|0.0e+00|ath:AT5G13630|K03403 magnesium chelatase subunit H [EC:6.6.1.1] | (RefSeq) GUN5; magnesium-chelatase subunit chlH, chloroplast, putative / Mg-protoporphyrin IX chelatase, putative (CHLH)	Porphyrin and chlorophyll metabolism (ko00860)	--	--	CobN/Magnesium Chelatase	Magnesium-chelatase subunit ChlH, chloroplastic OS=Arabidopsis thaliana OX=3702 GN=CHLH PE=1 SV=1	H	Coenzyme transport and metabolism	magnesium-chelatase subunit chlH, chloroplast, putative / Mg-protoporphyrin IX chelatase, putative (CHLH) [Arabidopsis thaliana]	biological process: metabolic process (GO:0008152);; biological process: cellular process (GO:0009987);; molecular function: catalytic activity (GO:0003824)
AT3G56940	CRD1	138.993	8682	147.187	8264	274.696	15924	208.989	13867	0.0238943	0.725361	up	[P]	Inorganic ion transport and metabolism	Biological Process: photosynthesis (GO:0015979);; Biological Process: chlorophyll biosynthetic process (GO:0015995);; Molecular Function: metal ion binding (GO:0046872);; Molecular Function: magnesium-protoporphyrin IX monomethyl ester (oxidative) cyclase activity (GO:0048529);;	K04035|1.3e-227|ath:AT3G56940|K04035 magnesium-protoporphyrin IX monomethyl ester (oxidative) cyclase [EC:1.14.13.81] | (RefSeq) CRD1; dicarboxylate diiron protein, putative (Crd1)	Porphyrin and chlorophyll metabolism (ko00860)	--	--	Rubrerythrin	Magnesium-protoporphyrin IX monomethyl ester [oxidative] cyclase, chloroplastic OS=Arabidopsis thaliana OX=3702 GN=CRD1 PE=1 SV=2	H	Coenzyme transport and metabolism	dicarboxylate diiron protein, putative (Crd1) [Arabidopsis thaliana]	biological process: metabolic process (GO:0008152);; biological process: cellular process (GO:0009987);; molecular function: binding (GO:0005488);; molecular function: catalytic activity (GO:0003824)
AT3G53800	Fes1B	0.039766	4	0.033118	3	0.696983	42	1.02322	83	0.0146218	4.09115	up	--	--	Molecular Function: adenyl-nucleotide exchange factor activity (GO:0000774);; Cellular Component: cytoplasm (GO:0005737);; Cellular Component: endoplasmic reticulum (GO:0005783);;	K09562|2.2e-158|ath:AT3G53800|K09562 hsp70-interacting protein | (RefSeq) Fes1B; Fes1B	Protein processing in endoplasmic reticulum (ko04141)	[O]	Posttranslational modification, protein turnover, chaperones	HEAT repeat	--	O	Posttranslational modification, protein turnover, chaperones	Fes1B [Arabidopsis thaliana]	biological process: biological regulation (GO:0065007);; molecular function: binding (GO:0005488);; molecular function: molecular function regulator (GO:0098772);; cellular component: cellular anatomical entity (GO:0110165);; cellular component: intracellular (GO:0005622)
AT3G48420	CBBY	5.72107	308	7.37934	357	25.4937	1271	14.7614	843	0.00208551	1.56643	up	[GR]	Carbohydrate transport and metabolism;; General function prediction only	Molecular Function: hydrolase activity (GO:0016787);;	K20884|1.2e-10|mpp:MICPUCDRAFT_36086|K20884 riboflavin kinase / FMN hydrolase [EC:2.7.1.26 3.1.3.102] | (RefSeq) hypothetical protein	Riboflavin metabolism (ko00740)	[R]	General function prediction only	Haloacid dehalogenase-like hydrolase	CBBY-like protein OS=Arabidopsis thaliana OX=3702 GN=CBBY PE=1 SV=1	S	Function unknown	Haloacid dehalogenase-like hydrolase (HAD) superfamily protein [Arabidopsis thaliana]	molecular function: catalytic activity (GO:0003824)
AT1G32990	RPL11	28.4888	1315	32.29	1340	68.1083	2917	57.5049	2819	0.00146938	1.02121	up	[J]	Translation, ribosomal structure and biogenesis	Molecular Function: structural constituent of ribosome (GO:0003735);; Cellular Component: ribosome (GO:0005840);; Biological Process: translation (GO:0006412);;	K02867|1.4e-114|ath:AT1G32990|K02867 large subunit ribosomal protein L11 | (RefSeq) PRPL11; plastid ribosomal protein l11	Ribosome (ko03010)	[J]	Translation, ribosomal structure and biogenesis	Ribosomal protein L11, N-terminal domain	50S ribosomal protein L11, chloroplastic OS=Arabidopsis thaliana OX=3702 GN=RPL11 PE=2 SV=1	J	Translation, ribosomal structure and biogenesis	plastid ribosomal protein l11 [Arabidopsis thaliana]	molecular function: structural molecule activity (GO:0005198);; cellular component: intracellular (GO:0005622);; cellular component: cellular anatomical entity (GO:0110165);; biological process: metabolic process (GO:0008152);; biological process: cellular process (GO:0009987)
AT5G47190	AT5G47190	32.1912	1359	39.5532	1501	78.9258	3092	57.56	2582	0.0388528	0.891803	up	[J]	Translation, ribosomal structure and biogenesis	Molecular Function: structural constituent of ribosome (GO:0003735);; Cellular Component: ribosome (GO:0005840);; Biological Process: translation (GO:0006412);;	K02884|2.0e-113|ath:AT5G47190|K02884 large subunit ribosomal protein L19 | (RefSeq) Ribosomal protein L19 family protein	Ribosome (ko03010)	[J]	Translation, ribosomal structure and biogenesis	Ribosomal protein L19	50S ribosomal protein L19-2, chloroplastic OS=Arabidopsis thaliana OX=3702 GN=At5g47190 PE=2 SV=1	J	Translation, ribosomal structure and biogenesis	Ribosomal protein L19 family protein [Arabidopsis thaliana]	molecular function: structural molecule activity (GO:0005198);; cellular component: intracellular (GO:0005622);; cellular component: cellular anatomical entity (GO:0110165);; biological process: metabolic process (GO:0008152);; biological process: cellular process (GO:0009987)
AT1G75350	RPL31	51.0545	1814	56.1129	1792	112.539	3710	100.586	3796	0.00180275	0.969933	up	[J]	Translation, ribosomal structure and biogenesis	Molecular Function: structural constituent of ribosome (GO:0003735);; Cellular Component: ribosome (GO:0005840);; Biological Process: translation (GO:0006412);;	K02909|5.6e-77|ath:AT1G75350|K02909 large subunit ribosomal protein L31 | (RefSeq) emb2184; Ribosomal protein L31	Ribosome (ko03010)	--	--	Ribosomal protein L31	50S ribosomal protein L31, chloroplastic OS=Arabidopsis thaliana OX=3702 GN=RPL31 PE=2 SV=1	J	Translation, ribosomal structure and biogenesis	Ribosomal protein L31 [Arabidopsis thaliana]	molecular function: structural molecule activity (GO:0005198);; cellular component: intracellular (GO:0005622);; cellular component: cellular anatomical entity (GO:0110165);; biological process: metabolic process (GO:0008152);; biological process: cellular process (GO:0009987)
AT4G01310	RPL5	41.2828	1952	41.8866	1780	81.2283	3564	68.4818	3440	0.00569193	0.823563	up	[J]	Translation, ribosomal structure and biogenesis	Molecular Function: structural constituent of ribosome (GO:0003735);; Cellular Component: ribosome (GO:0005840);; Biological Process: translation (GO:0006412);;	K02931|7.7e-141|ath:AT4G01310|K02931 large subunit ribosomal protein L5 | (RefSeq) Ribosomal L5P family protein	Ribosome (ko03010)	[J]	Translation, ribosomal structure and biogenesis	ribosomal L5P family C-terminus	50S ribosomal protein L5, chloroplastic OS=Arabidopsis thaliana OX=3702 GN=RPL5 PE=2 SV=1	J	Translation, ribosomal structure and biogenesis	Ribosomal L5P family protein [Arabidopsis thaliana]	molecular function: structural molecule activity (GO:0005198);; cellular component: intracellular (GO:0005622);; cellular component: cellular anatomical entity (GO:0110165);; biological process: metabolic process (GO:0008152);; biological process: cellular process (GO:0009987)
AT1G78630	RPL13	57.9464	3373	57.3463	3000	114.957	6209	103.413	6393	0.00106263	0.901209	up	[J]	Translation, ribosomal structure and biogenesis	Molecular Function: structural constituent of ribosome (GO:0003735);; Cellular Component: ribosome (GO:0005840);; Biological Process: translation (GO:0006412);;	K02871|1.3e-134|ath:AT1G78630|K02871 large subunit ribosomal protein L13 | (RefSeq) emb1473; Ribosomal protein L13 family protein	Ribosome (ko03010)	[J]	Translation, ribosomal structure and biogenesis	Ribosomal protein L13	50S ribosomal protein L13, chloroplastic OS=Arabidopsis thaliana OX=3702 GN=RPL13 PE=2 SV=1	J	Translation, ribosomal structure and biogenesis	Ribosomal protein L13 family protein [Arabidopsis thaliana]	molecular function: structural molecule activity (GO:0005198);; cellular component: intracellular (GO:0005622);; cellular component: cellular anatomical entity (GO:0110165);; biological process: metabolic process (GO:0008152);; biological process: cellular process (GO:0009987)
AT5G54600	RPL24	113.963	4802	110.908	4200	191.308	7480	181.664	8130	0.0338246	0.713471	up	[J]	Translation, ribosomal structure and biogenesis	Molecular Function: structural constituent of ribosome (GO:0003735);; Cellular Component: ribosome (GO:0005840);; Biological Process: translation (GO:0006412);;	K02895|4.3e-104|ath:AT5G54600|K02895 large subunit ribosomal protein L24 | (RefSeq) RPL24; Translation protein SH3-like family protein	Ribosome (ko03010)	[J]	Translation, ribosomal structure and biogenesis	Ribosomal proteins 50S L24/mitochondrial 39S L24	50S ribosomal protein L24, chloroplastic OS=Arabidopsis thaliana OX=3702 GN=RPL24 PE=2 SV=2	J	Translation, ribosomal structure and biogenesis	Translation protein SH3-like family protein [Arabidopsis thaliana]	molecular function: structural molecule activity (GO:0005198);; cellular component: intracellular (GO:0005622);; cellular component: cellular anatomical entity (GO:0110165);; biological process: metabolic process (GO:0008152);; biological process: cellular process (GO:0009987)
AT5G65220	RPL29	84.242	2940	87.5335	2746	166.955	5407	136.66	5066	0.00704283	0.794819	up	--	--	Molecular Function: structural constituent of ribosome (GO:0003735);; Cellular Component: ribosome (GO:0005840);; Biological Process: translation (GO:0006412);;	K02904|5.5e-79|ath:AT5G65220|K02904 large subunit ribosomal protein L29 | (RefSeq) Ribosomal L29 family protein	Ribosome (ko03010)	[J]	Translation, ribosomal structure and biogenesis	Ribosomal L29 protein	50S ribosomal protein L29, chloroplastic OS=Arabidopsis thaliana OX=3702 GN=RPL29 PE=1 SV=1	J	Translation, ribosomal structure and biogenesis	Ribosomal L29 family protein [Arabidopsis thaliana]	molecular function: structural molecule activity (GO:0005198);; cellular component: intracellular (GO:0005622);; cellular component: cellular anatomical entity (GO:0110165);; biological process: metabolic process (GO:0008152);; biological process: cellular process (GO:0009987)
AT1G64510	AT1G64510	55.365	2068	62.4453	2142	116.325	4122	97.0282	3825	0.0204758	0.824906	up	[J]	Translation, ribosomal structure and biogenesis	Molecular Function: structural constituent of ribosome (GO:0003735);; Molecular Function: translation elongation factor activity (GO:0003746);; Cellular Component: ribosome (GO:0005840);; Molecular Function: rRNA binding (GO:0019843);;	K02990|3.5e-113|ath:AT1G64510|K02990 small subunit ribosomal protein S6 | (RefSeq) Translation elongation factor EF1B/ribosomal protein S6 family protein	Ribosome (ko03010)	--	--	Ribosomal protein S6	30S ribosomal protein S6 alpha, chloroplastic OS=Arabidopsis thaliana OX=3702 GN=RPS6 PE=2 SV=1	S	Function unknown	Translation elongation factor EF1B/ribosomal protein S6 family protein [Arabidopsis thaliana]	molecular function: structural molecule activity (GO:0005198);; biological process: metabolic process (GO:0008152);; biological process: cellular process (GO:0009987);; biological process: biological regulation (GO:0065007);; molecular function: binding (GO:0005488);; molecular function: translation regulator activity (GO:0045182);; cellular component: intracellular (GO:0005622);; cellular compon…
AT3G25920	RPL15	62.3005	2982	69.1397	2975	132.152	5870	113.712	5782	0.00440999	0.879042	up	[J]	Translation, ribosomal structure and biogenesis	Molecular Function: structural constituent of ribosome (GO:0003735);; Biological Process: translation (GO:0006412);; Cellular Component: large ribosomal subunit (GO:0015934);;	K02876|1.2e-147|ath:AT3G25920|K02876 large subunit ribosomal protein L15 | (RefSeq) RPL15; ribosomal protein L15	Ribosome (ko03010)	[J]	Translation, ribosomal structure and biogenesis	Ribosomal proteins 50S-L15, 50S-L18e, 60S-L27A	50S ribosomal protein L15, chloroplastic OS=Arabidopsis thaliana OX=3702 GN=RPL15 PE=1 SV=2	J	Translation, ribosomal structure and biogenesis	ribosomal protein L15 [Arabidopsis thaliana]	molecular function: structural molecule activity (GO:0005198);; biological process: metabolic process (GO:0008152);; biological process: cellular process (GO:0009987);; cellular component: intracellular (GO:0005622);; cellular component: protein-containing complex (GO:0032991);; cellular component: cellular anatomical entity (GO:0110165)
AT1G05190	RPL6	44.1135	1940	47.0259	1859	107.837	4401	91.686	4283	4.01e-05	1.10574	up	[J]	Translation, ribosomal structure and biogenesis	Molecular Function: structural constituent of ribosome (GO:0003735);; Cellular Component: ribosome (GO:0005840);; Biological Process: translation (GO:0006412);; Molecular Function: rRNA binding (GO:0019843);;	K02933|9.8e-121|ath:AT1G05190|K02933 large subunit ribosomal protein L6 | (RefSeq) emb2394; Ribosomal protein L6 family	Ribosome (ko03010)	[J]	Translation, ribosomal structure and biogenesis	Ribosomal protein L6	50S ribosomal protein L6, chloroplastic OS=Arabidopsis thaliana OX=3702 GN=RPL6 PE=2 SV=1	J	Translation, ribosomal structure and biogenesis	Ribosomal protein L6 family [Arabidopsis thaliana]	molecular function: structural molecule activity (GO:0005198);; cellular component: intracellular (GO:0005622);; cellular component: cellular anatomical entity (GO:0110165);; biological process: metabolic process (GO:0008152);; biological process: cellular process (GO:0009987);; molecular function: binding (GO:0005488)
AT5G14320	RPS13	49.4997	2733	48.9078	2458	99.2349	5111	77.6899	4602	0.00503956	0.818786	up	[J]	Translation, ribosomal structure and biogenesis	Molecular Function: RNA binding (GO:0003723);; Molecular Function: structural constituent of ribosome (GO:0003735);; Cellular Component: ribosome (GO:0005840);; Biological Process: translation (GO:0006412);;	K02952|1.5e-89|ath:AT5G14320|K02952 small subunit ribosomal protein S13 | (RefSeq) EMB3137; Ribosomal protein S13/S18 family	Ribosome (ko03010)	[J]	Translation, ribosomal structure and biogenesis	Ribosomal protein S13/S18	30S ribosomal protein S13, chloroplastic OS=Arabidopsis thaliana OX=3702 GN=RPS13 PE=2 SV=1	J	Translation, ribosomal structure and biogenesis	Ribosomal protein S13/S18 family [Arabidopsis thaliana]	molecular function: binding (GO:0005488);; molecular function: structural molecule activity (GO:0005198);; cellular component: intracellular (GO:0005622);; cellular component: cellular anatomical entity (GO:0110165);; biological process: metabolic process (GO:0008152);; biological process: cellular process (GO:0009987)
AT3G63490	RPL1	73.2856	4421	71.2981	3867	147.339	8244	119.746	7672	0.00113982	0.85818	up	[J]	Translation, ribosomal structure and biogenesis	Molecular Function: RNA binding (GO:0003723);; Molecular Function: structural constituent of ribosome (GO:0003735);; Biological Process: translation (GO:0006412);; Cellular Component: large ribosomal subunit (GO:0015934);;	K02863|6.9e-190|ath:AT3G63490|K02863 large subunit ribosomal protein L1 | (RefSeq) EMB3126; Ribosomal protein L1p/L10e family	Ribosome (ko03010)	[J]	Translation, ribosomal structure and biogenesis	Ribosomal protein L1p/L10e family	50S ribosomal protein L1, chloroplastic OS=Arabidopsis thaliana OX=3702 GN=RPL1 PE=1 SV=1	J	Translation, ribosomal structure and biogenesis	Ribosomal protein L1p/L10e family [Arabidopsis thaliana]	molecular function: binding (GO:0005488);; molecular function: structural molecule activity (GO:0005198);; biological process: metabolic process (GO:0008152);; biological process: cellular process (GO:0009987);; cellular component: intracellular (GO:0005622);; cellular component: protein-containing complex (GO:0032991);; cellular component: cellular anatomical entity (GO:0110165)
AT3G27850	RPL12C	65.0311	2610	75.3665	2718	139.596	5198	121.806	5192	0.0100316	0.872729	up	[J]	Translation, ribosomal structure and biogenesis	Molecular Function: structural constituent of ribosome (GO:0003735);; Cellular Component: ribosome (GO:0005840);; Biological Process: translation (GO:0006412);;	K02935|8.3e-89|ath:AT3G27850|K02935 large subunit ribosomal protein L7/L12 | (RefSeq) RPL12-C; ribosomal protein L12-C	Ribosome (ko03010)	[J]	Translation, ribosomal structure and biogenesis	Ribosomal protein L7/L12 C-terminal domain	50S ribosomal protein L12-3, chloroplastic OS=Arabidopsis thaliana OX=3702 GN=RPL12C PE=2 SV=2	J	Translation, ribosomal structure and biogenesis	ribosomal protein L12-C [Arabidopsis thaliana]	molecular function: structural molecule activity (GO:0005198);; cellular component: intracellular (GO:0005622);; cellular component: cellular anatomical entity (GO:0110165);; biological process: metabolic process (GO:0008152);; biological process: cellular process (GO:0009987)
AT3G15190	RPS20	63.9698	2695	59.2366	2244	108.827	4255	99.7273	4464	0.0242526	0.741135	up	[J]	Translation, ribosomal structure and biogenesis	Molecular Function: RNA binding (GO:0003723);; Molecular Function: structural constituent of ribosome (GO:0003735);; Cellular Component: ribosome (GO:0005840);; Biological Process: translation (GO:0006412);;	K02968|1.1e-97|ath:AT3G15190|K02968 small subunit ribosomal protein S20 | (RefSeq) PRPS20; chloroplast 30S ribosomal protein S20	Ribosome (ko03010)	--	--	Ribosomal protein S20	30S ribosomal protein S20, chloroplastic OS=Arabidopsis thaliana OX=3702 GN=RPS20 PE=2 SV=1	J	Translation, ribosomal structure and biogenesis	chloroplast 30S ribosomal protein S20 [Arabidopsis thaliana]	molecular function: binding (GO:0005488);; molecular function: structural molecule activity (GO:0005198);; cellular component: intracellular (GO:0005622);; cellular component: cellular anatomical entity (GO:0110165);; biological process: metabolic process (GO:0008152);; biological process: cellular process (GO:0009987)
AT1G48350	RPL18	68.9762	2589	66.8358	2255	126.545	4408	126.889	5059	0.00824334	0.887109	up	[J]	Translation, ribosomal structure and biogenesis	Molecular Function: structural constituent of ribosome (GO:0003735);; Cellular Component: ribosome (GO:0005840);; Biological Process: translation (GO:0006412);;	K02881|2.6e-89|ath:AT1G48350|K02881 large subunit ribosomal protein L18 | (RefSeq) EMB3105; Ribosomal L18p/L5e family protein	Ribosome (ko03010)	[O]	Posttranslational modification, protein turnover, chaperones	Ribosomal L18 of archaea, bacteria, mitoch. and chloroplast	50S ribosomal protein L18, chloroplastic OS=Arabidopsis thaliana OX=3702 GN=RPL18 PE=2 SV=1	J	Translation, ribosomal structure and biogenesis	Ribosomal L18p/L5e family protein [Arabidopsis thaliana]	molecular function: structural molecule activity (GO:0005198);; cellular component: intracellular (GO:0005622);; cellular component: cellular anatomical entity (GO:0110165);; biological process: metabolic process (GO:0008152);; biological process: cellular process (GO:0009987)
AT1G79850	RPS17	103.384	3071	92.9366	2482	174.43	4809	155.209	4898	0.0252819	0.727961	up	[J]	Translation, ribosomal structure and biogenesis	Molecular Function: structural constituent of ribosome (GO:0003735);; Cellular Component: ribosome (GO:0005840);; Biological Process: translation (GO:0006412);;	K02961|3.2e-75|ath:AT1G79850|K02961 small subunit ribosomal protein S17 | (RefSeq) RPS17; ribosomal protein S17	Ribosome (ko03010)	[J]	Translation, ribosomal structure and biogenesis	Ribosomal protein S17	30S ribosomal protein S17, chloroplastic OS=Arabidopsis thaliana OX=3702 GN=RPS17 PE=1 SV=1	J	Translation, ribosomal structure and biogenesis	ribosomal protein S17, partial [Arabidopsis thaliana]	molecular function: structural molecule activity (GO:0005198);; cellular component: intracellular (GO:0005622);; cellular component: cellular anatomical entity (GO:0110165);; biological process: metabolic process (GO:0008152);; biological process: cellular process (GO:0009987)
AT2G33800	RPS5	45.2866	2481	51.803	2550	95.3114	4845	78.1707	4548	0.0198969	0.809604	up	[J]	Translation, ribosomal structure and biogenesis	Molecular Function: RNA binding (GO:0003723);; Molecular Function: structural constituent of ribosome (GO:0003735);; Biological Process: translation (GO:0006412);; Cellular Component: small ribosomal subunit (GO:0015935);;	K02988|4.7e-158|ath:AT2G33800|K02988 small subunit ribosomal protein S5 | (RefSeq) EMB3113; Ribosomal protein S5 family protein	Ribosome (ko03010)	[J]	Translation, ribosomal structure and biogenesis	Ribosomal protein S5, C-terminal domain	30S ribosomal protein S5, chloroplastic OS=Arabidopsis thaliana OX=3702 GN=rps5 PE=2 SV=1	J	Translation, ribosomal structure and biogenesis	Ribosomal protein S5 family protein [Arabidopsis thaliana]	molecular function: binding (GO:0005488);; molecular function: structural molecule activity (GO:0005198);; biological process: metabolic process (GO:0008152);; biological process: cellular process (GO:0009987);; cellular component: intracellular (GO:0005622);; cellular component: protein-containing complex (GO:0032991);; cellular component: cellular anatomical entity (GO:0110165)
AT1G07320	RPL4	19.93	1157	25.0968	1322	60.4644	3273	40.3133	2470	0.0108848	1.11218	up	[J]	Translation, ribosomal structure and biogenesis	Molecular Function: structural constituent of ribosome (GO:0003735);; Cellular Component: ribosome (GO:0005840);; Biological Process: translation (GO:0006412);;	K02926|3.3e-150|ath:AT1G07320|K02926 large subunit ribosomal protein L4 | (RefSeq) RPL4; ribosomal protein L4	Ribosome (ko03010)	[J]	Translation, ribosomal structure and biogenesis	Ribosomal protein L4/L1 family	50S ribosomal protein L4, chloroplastic OS=Arabidopsis thaliana OX=3702 GN=RPL4 PE=2 SV=2	J	Translation, ribosomal structure and biogenesis	ribosomal protein L4 [Arabidopsis thaliana]	molecular function: structural molecule activity (GO:0005198);; cellular component: intracellular (GO:0005622);; cellular component: cellular anatomical entity (GO:0110165);; biological process: metabolic process (GO:0008152);; biological process: cellular process (GO:0009987)
AT5G30510	RPS1	70.1162	4659	70.7135	4223	131.957	8136	101.23	7145	0.0305285	0.696847	up	[J]	Translation, ribosomal structure and biogenesis	Molecular Function: nucleic acid binding (GO:0003676);;	K02945|5.5e-226|ath:AT5G30510|K02945 small subunit ribosomal protein S1 | (RefSeq) RPS1; ribosomal protein S1	Ribosome (ko03010)	--	--	S1 RNA binding domain	30S ribosomal protein S1, chloroplastic OS=Arabidopsis thaliana OX=3702 GN=RPS1 PE=1 SV=1	J	Translation, ribosomal structure and biogenesis	ribosomal protein S1 [Arabidopsis thaliana]	molecular function: binding (GO:0005488)
AT3G44890	RPL9	49.3512	2511	47.8008	2186	85.8777	4055	73.105	3951	0.0336941	0.687121	up	[J]	Translation, ribosomal structure and biogenesis	Molecular Function: structural constituent of ribosome (GO:0003735);; Cellular Component: ribosome (GO:0005840);; Biological Process: translation (GO:0006412);;	K02939|1.5e-101|ath:AT3G44890|K02939 large subunit ribosomal protein L9 | (RefSeq) RPL9; ribosomal protein L9	Ribosome (ko03010)	[J]	Translation, ribosomal structure and biogenesis	Ribosomal protein L9, C-terminal domain	50S ribosomal protein L9, chloroplastic OS=Arabidopsis thaliana OX=3702 GN=RPL9 PE=2 SV=1	J	Translation, ribosomal structure and biogenesis	ribosomal protein L9 [Arabidopsis thaliana]	molecular function: structural molecule activity (GO:0005198);; cellular component: intracellular (GO:0005622);; cellular component: cellular anatomical entity (GO:0110165);; biological process: metabolic process (GO:0008152);; biological process: cellular process (GO:0009987)
AT1G35680	RPL21	45.792	1799	50.2467	1775	114.064	4159	83.2873	3476	0.00208551	1.00416	up	[J]	Translation, ribosomal structure and biogenesis	Molecular Function: RNA binding (GO:0003723);; Molecular Function: structural constituent of ribosome (GO:0003735);; Cellular Component: ribosome (GO:0005840);; Biological Process: translation (GO:0006412);;	K02888|5.7e-113|ath:AT1G35680|K02888 large subunit ribosomal protein L21 | (RefSeq) RPL21C; Ribosomal protein L21	Ribosome (ko03010)	[J]	Translation, ribosomal structure and biogenesis	Ribosomal prokaryotic L21 protein	50S ribosomal protein L21, chloroplastic OS=Arabidopsis thaliana OX=3702 GN=RPL21 PE=2 SV=1	J	Translation, ribosomal structure and biogenesis	Ribosomal protein L21 [Arabidopsis thaliana]	molecular function: binding (GO:0005488);; molecular function: structural molecule activity (GO:0005198);; cellular component: intracellular (GO:0005622);; cellular component: cellular anatomical entity (GO:0110165);; biological process: metabolic process (GO:0008152);; biological process: cellular process (GO:0009987)
AT1G29070	RPL34	50.7352	1739	57.4608	1770	101.881	3240	105.699	3848	0.0206852	0.927479	up	--	--	Molecular Function: structural constituent of ribosome (GO:0003735);; Cellular Component: ribosome (GO:0005840);; Biological Process: translation (GO:0006412);;	K02914|1.7e-74|ath:AT1G29070|K02914 large subunit ribosomal protein L34 | (RefSeq) Ribosomal protein L34	Ribosome (ko03010)	--	--	Ribosomal protein L34	50S ribosomal protein L34, chloroplastic OS=Arabidopsis thaliana OX=3702 GN=RPL34 PE=2 SV=1	J	Translation, ribosomal structure and biogenesis	Ribosomal protein L34 [Arabidopsis thaliana]	molecular function: structural molecule activity (GO:0005198);; cellular component: intracellular (GO:0005622);; cellular component: cellular anatomical entity (GO:0110165);; biological process: metabolic process (GO:0008152);; biological process: cellular process (GO:0009987)
AT1G74970	RPS9	33.3133	1557	31.8843	1340	68.8697	2987	61.8593	3071	0.000656214	0.983489	up	[J]	Translation, ribosomal structure and biogenesis	Molecular Function: structural constituent of ribosome (GO:0003735);; Cellular Component: ribosome (GO:0005840);; Biological Process: translation (GO:0006412);;	K02996|1.3e-106|ath:AT1G74970|K02996 small subunit ribosomal protein S9 | (RefSeq) RPS9; ribosomal protein S9	Ribosome (ko03010)	[J]	Translation, ribosomal structure and biogenesis	Ribosomal protein S9/S16	30S ribosomal protein S9, chloroplastic OS=Arabidopsis thaliana OX=3702 GN=RPS9 PE=2 SV=1	J	Translation, ribosomal structure and biogenesis	ribosomal protein S9 [Arabidopsis thaliana]	molecular function: structural molecule activity (GO:0005198);; cellular component: intracellular (GO:0005622);; cellular component: cellular anatomical entity (GO:0110165);; biological process: metabolic process (GO:0008152);; biological process: cellular process (GO:0009987)
AT3G52150	PSRP2	38.5876	1931	45.8568	2046	80.0279	3723	66.6356	3548	0.0477128	0.778089	up	[J]	Translation, ribosomal structure and biogenesis	Molecular Function: RNA binding (GO:0003723);;	K13126|1.2e-135|ath:AT3G52150|K13126 polyadenylate-binding protein | (RefSeq) PSRP2; RNA-binding (RRM/RBD/RNP motifs) family protein	RNA transport (ko03013);; mRNA surveillance pathway (ko03015);; RNA degradation (ko03018)	[R]	General function prediction only	RNA recognition motif. (a.k.a. RRM, RBD, or RNP domain)	30S ribosomal protein 2, chloroplastic OS=Arabidopsis thaliana OX=3702 GN=PSRP2 PE=2 SV=1	S	Function unknown	RNA-binding (RRM/RBD/RNP motifs) family protein [Arabidopsis thaliana]	molecular function: binding (GO:0005488)
AT5G58770	AT5G58770	4.49971	250	3.51591	176	9.4159	486	9.01062	532	0.0311309	1.18617	up	[I]	Lipid transport and metabolism	Molecular Function: transferase activity, transferring alkyl or aryl (other than methyl) groups (GO:0016765);;	K11778|3.3e-175|ath:AT5G58770|K11778 ditrans,polycis-polyprenyl diphosphate synthase [EC:2.5.1.87] | (RefSeq) cPT4; Undecaprenyl pyrophosphate synthetase family protein	Terpenoid backbone biosynthesis (ko00900)	[I]	Lipid transport and metabolism	Putative undecaprenyl diphosphate synthase	Dehydrodolichyl diphosphate synthase 2 OS=Arabidopsis thaliana OX=3702 GN=At5g58770 PE=2 SV=2	I	Lipid transport and metabolism	Undecaprenyl pyrophosphate synthetase family protein [Arabidopsis thaliana]	molecular function: catalytic activity (GO:0003824)
AT1G60190	PUB19	2.90359	295	2.74478	250	19.8858	1870	4.77655	515	0.0408629	2.03062	up	--	--	Molecular Function: ubiquitin-protein transferase activity (GO:0004842);;	K10260|2.5e-13|mpp:MICPUCDRAFT_56233|K10260 F-box and WD-40 domain protein 7 | (RefSeq) WD40 repeat protein	Ubiquitin mediated proteolysis (ko04120)	[S]	Function unknown	U-box domain	U-box domain-containing protein 19 OS=Arabidopsis thaliana OX=3702 GN=PUB19 PE=2 SV=1	O	Posttranslational modification, protein turnover, chaperones	ARM repeat superfamily protein [Arabidopsis thaliana]	molecular function: catalytic activity (GO:0003824)
AT1G09340	CRB	23.2542	1838	27.4253	1941	69.2143	5056	43.3623	3636	0.00676712	1.10488	up	[M]	Cell wall/membrane/envelope biogenesis	Molecular Function: RNA binding (GO:0003723);; Molecular Function: catalytic activity (GO:0003824);; Cellular Component: cytosol (GO:0005829);; Biological Process: rRNA processing (GO:0006364);;	K05605|4.8e-27|han:110892672|K05605 3-hydroxyisobutyryl-CoA hydrolase [EC:3.1.2.4] | (RefSeq) 3-hydroxyisobutyryl-CoA hydrolase 1-like	Valine, leucine and isoleucine degradation (ko00280);; beta-Alanine metabolism (ko00410);; Propanoate metabolism (ko00640);; Carbon metabolism (ko01200)	--	--	NAD dependent epimerase/dehydratase family	Chloroplast stem-loop binding protein of 41 kDa b, chloroplastic OS=Arabidopsis thaliana OX=3702 GN=CSP41B PE=1 SV=1	S	Function unknown	chloroplast RNA binding protein [Arabidopsis thaliana]	molecular function: binding (GO:0005488);; molecular function: catalytic activity (GO:0003824);; cellular component: cellular anatomical entity (GO:0110165);; biological process: metabolic process (GO:0008152);; biological process: cellular process (GO:0009987)
AT3G63110	IPT3	19.669	1371	25.2079	1580	10.5339	682	10.0252	743	0.00774027	-1.14473	down	[J]	Translation, ribosomal structure and biogenesis	Biological Process: tRNA processing (GO:0008033);;	K10760|2.8e-188|ath:AT3G63110|K10760 adenylate dimethylallyltransferase (cytokinin synthase) [EC:2.5.1.27 2.5.1.112] | (RefSeq) IPT3; isopentenyltransferase 3	Zeatin biosynthesis (ko00908)	[J]	Translation, ribosomal structure and biogenesis	IPP transferase	Adenylate isopentenyltransferase 3, chloroplastic OS=Arabidopsis thaliana OX=3702 GN=IPT3 PE=1 SV=1	J	Translation, ribosomal structure and biogenesis	isopentenyltransferase 3 [Arabidopsis thaliana]	biological process: metabolic process (GO:0008152);; biological process: cellular process (GO:0009987)
