# Supplementary material for: MtTGA1 Transcription Factor Enhances Salt Tolerance through Hormonal Regulation and Antioxidant Enzyme Activity in <em>Medicago truncatula</em>
Source: Preprints.org preprint supplement (doi:10.20944/preprints202306.0691.v1), 2023-06-09
Supplement: Supplementary file 2 [file Supplementary Table S1.xlsx]

## Sheet: Sheet1
TGA1-RT-F	CGTCCGCACAGTTTGTTTCCTCG
TGA1-RT-R	AGAATCCAACCCACCACCCATAT
TGA1-3302Y-F	agaacacgggggactcttgaATGAATTCTCCGTCCGCACA
TGA1-3302Y-R	tagatctgactagtacgcgt AGCAGGTTCTCGGGGTCGAT
TGA1-strep-F	aacacgggggactcttgaccATGAATTCTCCGTCCGCACA
TGA1-strep-F	TGATGATGGCTGCTGCCCATCTAAGCAGGTTCTCGGGGTC
Mtaction-F	TGATCTGGCTGGTCGTGACCTTA
Mtaction-F	ATGCCTGCTGCTTCCATTCCTAT
TGA1-F	CACATTTCAACCACCACTCCC
TGA1-R	TGTGGTTTAGGCTGCTCAAAT
PGBKT7-TGA1-F	AGAGGAGGACCTGCATATGG ATGAATTCTCCGTCCGCACA
PGBKT7-TGA1-R	GATCCCCGGGAATTCGGCCTCTAAGCAGGTTCTCGGGGTC
PGADT7-SPX-F	GAGGCCAGTGAATTCCACCCGAAATTCGGTAAGAGTTTAA
PGADT7-SPX-R	TCCCGTATCGATGCCCACCCTTACTTGGCCTCTTGTTCCA
TGA1-NE2-F	GGCCTGGCGCGCCACTAGTGATGAATTCTCCGTCCGCACA
TGA1-NE2-R	GACAGTACTATCGATGGATCCTAAGCAGGTTCTCGGGGTC
SPX-CE4-F	AGGCCTGGCGCGCCACTAGTATGAAATTCGGTAAGAGTTT
SPX-CE4-R	AGGTCGACAGTACTATCGAT TTACTTGGCCTCTTGTTCCA
