# Supplementary material for: MtTGA1 Transcription Factor Enhances Salt Tolerance through Hormonal Regulation and Antioxidant Enzyme Activity in <em>Medicago truncatula</em>
Source: Preprints.org preprint supplement (doi:10.20944/preprints202306.0691.v1), 2023-06-09
Supplement: Supplementary file 3 [file Supplementary Table S2.xlsx]

## Sheet: Sheet1
Protein name	Protein sequence
transcription factor TGA1 isoform X1 [Medicago truncatula]	MNSPSAQFVSSRRMSVYDPIHQINMWGEGFKSNGNLSASIPLIDEADLKFDSSQSEDASHGMLGTSNKYEQEANRPIDKI QRRLAQNREAARKSRLRKKAYVQQLESSRLKLVQLEQELERVRQQGMYMGGGLDSNNMCFAGPVNPGIAAFEMEYGHWVD EQNRQISEMRNALNSHISDIELRMLVDGMMNHYAEIYRMKSAAAKTDVFYVMSGMWKTTAERFFLWIGGFRPSELLKILG PMIEPLTEQQRLDIDNLGQSCQQAEDALSQGMEKLRQTLADSVAAGQFIEGTYIPQMATAMEKLEALVSFVNQADHLRQE TLQQMSRTLTIRQSARCLLALGEYFQRLRALSSLWSNRPREPA
transcription factor TGA1-like isoform X1 [Trifolium pratense]	MNSPSAQFVSSRRMSVYDPIHQINMWGEGFKSNGNLSASIPLIDEVDLKFDSSQSEDASHGILGTSNKYDQEASRPIDKI QRRLAQNREAARKSRLRKKAYVQQLESSRLKLVQLEQELERVRQQGMYMNGGLDSNNMCFAGPMNSGIAAFEMEYGHWVD EQNRQISEMRSALNSHISDIELRILVDGMMNHYAEIYRMKSAAAKADVFYVMSGMWKTTAERFFLWIGGFRPSELLKILG PMIEPLTEQQRLDIDNLGQSCQQAEDALSQGMEKLRQTLADSVAAGQFIEGTYIPQMATAMEKLEALVCFVNQADHLRQE TLQQMSRILTIRQSARCLLALGEYFQRLRALSSLWSNRPREPA
transcription factor TGA1-like isoform X2 [Trifolium pratense]	MNSPSAQFVSSRRMSVYDPIHQINMWGEGFKSNGNLSASIPLIDEVDLKFDSSQSEDASHGILGTSNKYDQEASRPIDKI QRRLAQNREAARKSRLRKKAYVQQLESSRLKLVQLEQELERVRQQGMYMNGGLDSNNMCFAGPMNSAFEMEYGHWVDEQN RQISEMRSALNSHISDIELRILVDGMMNHYAEIYRMKSAAAKADVFYVMSGMWKTTAERFFLWIGGFRPSELLKILGPMI EPLTEQQRLDIDNLGQSCQQAEDALSQGMEKLRQTLADSVAAGQFIEGTYIPQMATAMEKLEALVCFVNQADHLRQETLQ QMSRILTIRQSARCLLALGEYFQRLRALSSLWSNRPREPA
transcription factor TGA1-like isoform X1 [Pisum sativum]	MNSPQFVSSRRMSVYDPIHQINMWGEGFKSNGNLSASMPLIDEADLKFDSSQSEDVSHSILGTSNKYDQEASRPIDKIQR RLAQNREAARKSRLRKKAYVQQLESSRLKLVQLEQELERVRQQGMYMGGGLDSNSMCFVGPMNSGIAAFEMEYGHWVDEQ NRQISEMRIALNAHISDIELRILVDGMMNHYTEIYRMKSAAAKADVFYVMSGMWKTTAERFFLWIGGFRPSELLKILGPM IEPLTEQQRLDIDNLGQSCQQAEDALSQGMEKLRQTLADSVAAGQFMEGTYIPQMASAMERLDALVSFVNQADHLRQETL QQMSRILTTRQSARCLLALGEYFQRLRALSSLWSNRPREPA
hypothetical protein TSUD_300650 [Trifolium subterraneum]	MSVYDPIHQINMWGEGFKSNGNLSASIPLIDEVDLKFDSSQSEDASHGILGTSNKYDQEASRPIDKIQRRLAQNREAARK SRLRKKAYVQQLESSRLKLVQLEQELERVRQQGMYMAGGLDSNNMCFAGPMNSGIAAFEMEYGHWVDEQNRQISEMRNAL NSHISDIELRILVDGMMNHYAEIYRMKSAAAKADVFYVMSGMWKTTAERFFLWIGGFRPSELLKILGPMIEPLTEQQRLD IDNLGQSCQQAEDALSQGMEKLRQTLADSVAAGQFIEGTYIPQMATAMEKLKALVCFVNQADHLRQETLQQMSRILTIRQ SARCLLALGEYFQRLRALSSLWSNRPREPA
transcription factor TGA4-like [Vigna unguiculata]	MNSASPQFVSSRRMSVYDPIHQISMWGEGFKSNGNLSASMPLIDETDMKLDSQSEDASHGILGAPNKYDQEANKPTDKIQ RRLAQNREAARKSRLRKKAYVQQLESSRLKLMQLEQELERARQQGMYIGGGLDSNHLGFAGSVNSGITTFETEYGHWVNE QNRQITELRSALNAHIGDIELRILVDGMMNHYAEIFRMKSAAAKADVFYVMSGMWKTTAERFFLWIGGFRPSELLKVLGP LIEPLTEQQRLDIYNLGQSCQQAEDALSQGMDKLRQTLADSVAAGQFMEGTYIPQMTSAMEKLEALVSFVNQADHLRQGT LQQMSRILTIRQAARCLLALGEYFQRLRALSSLWSNRPREPA
bZIP transcription factor [Glycine max]	MNSASPQFVSSRRMSVYDPIHQISMWGEGFKSNGNLSAAMPLIDETDMKFDSQSEDASHGILGEPNKYDQEANKPTDKIQ RRLAQNREAARKSRLRKKAYVQQLESSRLKLMQLEQELERARQQGIYIGGGLDSNHLGFAGSVNSGITTFEMEYGHWVNE QNRQITELRNALNAHIGDVELRILVDGMMSHYAEMFRMKSAAAKADVFYVMSGMWKTTAERFFLWIGGFRPSELLKVLGP LIEPLTEQQRLDIYNLGQSCQQAEDALSQGMDKLRQTLADSVAAGQFMEGTYIPQMTSAMDKLKALVSFVNQADHLRQET LQQMSRILTIRQAARCLLALGEYFQRLRALSSLWSNRPREPA
hypothetical protein PHAVU_001G249300g [Phaseolus vulgaris]	MNSASPQFVSARRMSVYDPIHQISMWGEGFKSNGNLSASMPLIDDADMKLDSQSEDASHGILGAPSKYDQEANKPTDKIQ RRLAQNREAARKSRLRKKAYVQQLESSRLKLMQLEQELERARHQGMYIGGGLDSNHMGFSGSVNSGITTFEMEYGHWVNE QNRQITELRTALNAHIGDIELRILVDGMMNHYAEIFRMKSAAAKADVFYVMSGMWKTTAERFFLWIGGFRPSELLKVLGP LIEPLTEKQRLDIYNLGQSCQQAEDALSQGMDKLRHTLADSVAAGQFMEGTYIPQMTSAMEKLEALVSFVNQADHLRQGT LQQMSRILTIRQAARCLLALGEYFQRLRALSSLWSNRPREPA
transcription factor TGA4-like isoform X1 [Glycine soja]	MNSASPQFVSSRRMSVYDPIHQISMWGEGFKSNGNLSAAMPLIDETDMKFDSQSEDASHGILGEPNKYDQEANKPTDKIQ RRLAQNREAARKSRLRKKAYVQQLESSRLKLMQLEQELERARQQATKLQGIYIGGGLDSNHLGFAGSVNSGITTFEMEYG HWVNEQNRQITELRNALNAHIGDVELRILVDGMMSHYAEMFRMKSAAAKADVFYVMSGMWKTTAERFFLWIGGFRPSELL KVLGPLIEPLTEQQRLDIYNLGQSCQQAEDALSQGMDKLRQTLADSVAAGQFMEGTYIPQMTSAMDKLKALVSFVNQADH LRQETLQQMSRILTIRQAARCLLALGEYFQRLRALSSLWSNRPREPA
transcription factor TGA4 [Cajanus cajan]	MNSPTPQFVSSRRMSVYDPIHQISMWGEGFKSNGNLSASVPLIDEPDMKLDSQSEDASHGILGEPNKYDQEANKPTDKIQ RRLAQNREAARKSRLRKKAYVQQLESSRLKLMQLEQELERARQQGMYIGGGLDSNHLGFAGSVNSGITTFETEYGHWVNE QNRQITELRSALNAHIGDMELRILVDGMMSHYAEIFRMKSAAAKADVFYVMSGMWKTTAERFFLWIGGFRPSELLKVLGP LIEPLTEQQRLDIYTLGQSCQQAEDALSQGMDKLRQLLADSVAAGQFMEGTYIPQMTSAMENLEALVSFVNQADHLRQGT LQQMSRILTIRQAARCLLALGEYFQRLRALSSLWSNRPREPA
Transcription factor TGA1 [Spatholobus suberectus]	MNSPSPQFVSSRRMGVYDPIHQISMWGEGFKSNGNLSASMPLIDEADMKLDSQSEDTSQGILGAPNKYDQEANKPTEKVQ RRLAQNREAARKSRLRKKAYVQQLESSRLKLMQLEQELERARQQGMYIGGGLDSNHLGFAESVNSGITTFEMEYGNWVNE QNRQITELRNALNAHIGDIELRILVDSMMRHYAEIFRMKSAAAKADVFYVMSGMWKTTAERFFLWIGGFRPSELLKVLGP LIEPLTEQQRLDIYNLGQSCQQAEDALSQGMDKLRQTLADSVAAGQFMEGTYIPQMTSAMEKLEALVSFVNQADHLRQET LQQMSRILTIRQAARCLLALGEYFQRLRALSSLWSNRPREPA
Stranscription factor TGA4-like isoform X1 [Abrus precatorius]	MNSPSPQFVSSRRMSVYDPIHQISMWGESFKTNGNLGAAIPLIDEADMKLDSQSEDASHGILGTPNKYDQEANKPNEKIQ RRLAQNREAARKSRLRKKAYVQQLESSRLKLMQLEQELERARQQGMYIGGGLDSNHLGFAGSVNSGITTFEMEYGHWVNE QTRQISELRNALNAHIGDMELRILVDGMMNHYAEIFRMKSAAAKADVFYVMSGMWKTTAERFFLWIGGFRPSELLKVLGP LIEPLTEQQRLDIYNLGQSCQQAEDALSQGMDKLRQTLADSVAAGQFMEGTYSQQMTIAKEKLEALVSFVNQADHLRQET LQQMSRILTTRQAARCLLALGEYFQRLRTLSTLWSNRPREPA
transcription factor TGA4 [Arachis hypogaea]	MNSPSTQFVSSRRMGVYDPIQQINMWGDSLKSNVNLSASIPLIDEADIKFDSQSEDASHGILGTNIKYDQEASKPVDKIQ RRLAQNREAARKSRLRKKAYVQQLESSRLKLMQLEQELERARQQGMYVAGGLDTNHLGFAGPINSGITAFEMEYGHWVEK QNSQILELRNALNSHIGDLELRILVDDMMNHYTEIFRMKSAAAKADVFYVMSGMWKTTAERFFLWIGGFRPSELLKVLLP LIEPLTEQQRLDVCNLGQSCQQAEDALSQGMEKLQQTLADSIAAGQLMEGSYIPQMATAIEKLEALVSFVNQADHLRKET LQQMSRILTIRQAARCLLALGEYFQRLRALSSLWSNRPREPA
TGACG-motif-binding protein [Glycine max]	MNSASPQFVSPRSMSVYDPIHQISMWGEGFKSNGNLSAAMPLIDEADMKFDSQSEDASHGILGEPNKYDQEASKPTDKIQ RRLAQNREAARKSRLRKKAYVQQLESSRLKLMQLEQELERARQQGMYIGGGLDSNHLGFAGSVNSGITTFEMEYGHWVNE QNRQITELRNALNAHIGDVELRILVDGMMSHYAEMFRMKSAAAKADVFYVMSGMWKTTAERFSLWIGGFHPSELLKVLGP LIEPLTEQQRLNIYNLGQSCQQAEDALSQGMDKLRQTLADSVAAGQFMEGTYIPQMTSAMEKLEDLVSFVKQADHLRQET LEQMSRILTIRQAARCLLALGEYFQRLRALSSLWSNRPREPA
Transcription factor TGA1, partial [Mucuna pruriens]	MSSMNSPTPHFVSSRRMSVYDPIHQISMWGEGFKSNGNLSTSMPLIDEEDMKLDSQSEDVSHGILGASNKYDQEANKPDK VQRRLAQNREAARKSRLRKKAYVQQLESSRLKLMQLEQELERARQQGMYIGGGLDSNHLGFDGSINSGITTFEMEYGNWV NEQNIQITELRSALNAHIGDIELRILVDSMMNHYIEIFRMKSTAAKADVFYVMSGMWKTTAERFFLWIGGFRPSELLKVL GPLIEPLTEQQRLDIYNLGQSCQQAEDALSQGMDKLRQTLADSVAAGQFMEGTYIPQMTSAMEKLEALVSFVNQADHLRQ ETLQQMTRILTIRQAARCLLALGEYFQRLRALSTLWSNRPLLHNGEVVNTTARSFYAYEFFDEPFVVSRIYNHHD…
hypothetical protein SESBI_34439 [Sesbania bispinosa]	MSVYDPIHQISSMWGEGFKTNGNLGAQIPLIDEADMKFDSQSEDASHGILGTPNKYDQEAHKPTDKIQRRLAQNREAARK SRLRKKAYVQQLESSRLKLMQLEQELERARQQGMYIGGGLDSNNLSFAGPVNSGITAFEMEYGLWVDEQNRQISEVRNAL NAHIGDIELRILVDGMMNHYIKIFRLKSAAAKADVFYVMSGMWKTTAERFFLWIGGFRPSELLKVLGPMIEPLTEKQRLD IENLGQSCQQAEDALSQGMDKLRQTLADSVAAGQFVEGTYIPQMASAMEKLEALADHLRQETLQQMSRILTIRQSARCLL ALGEYFQRLRALSSLWSNRPREPA
putative transcription factor bZIP family [Lupinus albus]	MNSPSAQFVSSRSMSVYDPIHQINMWGEGFKSNGNLGATIPLIDEADLKFDSQSEDASHVILGTPNKYDQEASKPAVDKT QRRLAQNREAARKSRLRKKAYVQQLESSRLKLMQLEQELEHARQQGLYVGGGLDSNNIGFAGPVNSGITTFEMEYGIWVE EQNRQILELRTALNAHIGDMELRILVEGIMNHYSEIFRMKSAAAKADVFYVMSGMWKTTAERFFLWIGGFRPSELLKVLL PLIEPLTEQQRLDLQNLGKSCQQAEDALSQGMDKLQQTLAESVAAGQLIEGSYIQQMGSAMEKLEALVCFVNQADHLRQE TLQQISRILTTRQAARCLLVLGEYFQRLRALSLLWSNQPREPA
hypothetical protein JHK82_032182 [Glycine max]	MSVYDPIHQISMWGEGFKSNGNLSAAMPLIDEADMKFDSQVQVYEIQDASHGILGEPNKYDQEASKPTDKIQRRLAQNRE AARKSRLRKKAYVQQLESSRLKLMQLEQELERARQQGMYIGGGLDSNHLGFAGSVNSGITTFEMEYGHWVNEQNRQITEL RNALNAHIGDVELRILVDGMMSHYAEMFRMKSAAAKADVFYVMSGMWKTTAERFFLWIGGFHPSELLKVLGPLIEPLTEQ QRLNIYNLGQSCQQAEDALSQGMDKLRQTLADSVAAGQFMEGTYIPQMTSAMEKLEDLVSFVKQADHLRQETLEQMSRIL TIRQAARCLLALGEYFQRLRALSSLWSNRPREPA
transcription factor TGA1-like isoform X4 [Cicer arietinum]	MVCYRGVLKGDLLDVRISSSGMNSPSAQFVSSRRMSVYDPIHQINMWGEGFKSNGNLSASLPLIDEADLKFDSSQSEDAS HGILGTSHKYDQEANRPIDKIQRRLAQNREAARKSRLRKKAYVQQLESSRLKLMQLEQELERTRQQGMYMGGGLDSNNMC FAGPVNSGITAFEMEYGHWVDEQNRQISEMRNALNAHIGDIELRILVEGMMNHYAEIYRMKSAAAKADVFYVMSGMWKTT AERFFLWIGGFRPSELLKILGPMIEPLTEQQRLDIDNLGQSCQQAEDALSQGMDKLRQTLADSVAAGQFIEGTYIPQMAS AMEKLDALVSFVNQVRACIQGFI
hypothetical protein L6164_012344 [Bauhinia variegata]	MNSPSTQFVSSRRMSVYDPIHQINMWGENFKTNGSLSPSVPLIGEEDVKLDSQSEDASHGTLGTSRKFDQEANKSIDKIQ RRLAQNREAARKSRLRKKAYVQQLETSRLKLMQMEQELDHARQQGLYIGGGLDSNQLGYAGSVNSGIATFEMEYGHWVEE QNRQILEMRTALSSHIGDIELRILVDGIMSHYFELFRMKSTAAKADVFYVMSGLWKTTAERFFLWIGGFRPSELLKVLVP LIEPLTEQQLVDVQNLGQSCQQAEDALSQGMDKLQQTLAETVATEQLVEGIYIPQMARAMEKLEALVSFVNQADHLRQET LLQMSRILTTRQAARYLLALGEYFQRLRALSSLWANRPREPA
transcription factor TGA [Vigna unguiculata]	MGVDKHSGGGGTVTGTGTGTGTGLRSTCANYIIYSCSTSCWCYDVGLTEYELVIDTKSMNSASPQFVSSRRMSVYDPIHQ ISMWGEGFKSNGNLSASMPLIDETDMKLDSQSEDASHGILGAPNKYDQEANKPTDKIQRRLAQNREAARKSRLRKKAYVQ QLESSRLKLMQLEQELERARQQGMYIGGGLDSNHLGFAGSVNSELRSALNAHIGDIELRILVDGMMNHYAEIFRMKSAAA KADVFYVMSGMWKTTAERFFLWIGGFRPSELLKVLGPLIEPLTEQQRLDIYNLGQSCQQAEDALSQGMDKLRQTLADSVA AGQFMEGTYIPQMTSAMEKLEALVSFVNQADHLRQGTLQQMSRILTIRQAARCLLALGEYFQRLRALSSLWSNRP…
transcription factor TGA4 isoform X2 [Prosopis cineraria]	MNSTSTQFVSTRRMGVYDPIHQISMWEENFKSNCSLSASMSLIGEADVKLDTQSEDSSHGILGIPRNYDQEANKSIEKIQ RRLAQNREAARKSRLRKKAYVQQLESSRLKLIKLEQELDRARQQGSFIGCRLDSDNLVFAGSVNSGIATFEMEYGHWVEK QNRQICELRTALNAHISDVELRILVDGIMNHYSDLFRMKSAAAKVDVFYVLFGMWKTTAERFFLWIGGFRPSELLKVLVP LIEPLTEQQRMDVYNLGQSCQQAEDALSQGRDRLQQILAETVAAGQLVDGTYIPQMATAVEKLEALVSFVNQADHLRQET LQQILRILTIRQAARCLLALGEYFQRLRALSSLWANRPSEPPA
transcription factor TGA4-like [Senna tora]	MNSSSTQFVSTRRMGVYDPIHQISMWEENFKSNCNLSASVPLIGEADAKSDNQSEDVSHGMLGIPKSYDQEANKPFEKIQ RRLAQNREAARKSRLRKKAYVQQLESSRMKLIKLEQELDRARQQGSFIGCGLDSDNMAFAGSVNSGITTFEMEYGLWVEK QNKQICELRTALNAHISDTELRILVDGIMKHYSELFRMKSAVAKVDVFYVLFGMWKTTAERFFLWIGGFRPSGLLKVLVP LIEPLTEQQRLDVYNLGQSCQQAEDALSQGRDKLQQILAETVAGGQMVDGTFIPQMATAVEKFEALVSFVNQQNLTKLYV KQADHLRQETLQQMFRILTIRQAARCLLALGEYFQRLRALSSLWANRPHEPA
Transcription factor like [Melia azedarach]	MNSPTTQFVTPRRLGIYEPIHQISPWGENFKSNGNPNASASMIVEVDAKLDDQSEDTSHGTLGTSNQYEQEASKPPDKIQ RRLAQNREAARKSRLRKKAYVQQLETSRLKLVQLEQELERARQQGLYFGGGVEGVHLGFSGAVNSGIAAFEMEYGHWVEE QNRQISELRTALNAHISDIELRILVDSGMSHYFELFRLKTAAAKADVFYVMSGMWKTAAERFFFWIGGFRPSELLKVLVP QLDPLTDQQLLDVCNLRQSCQQAEDALSQGMEKLQQTLAETVAAGQLGDGSYIPRMGTAMERLDALVSFVNQADHLRQET LQQMSRILTTRQAARALLALGEYFQRLRALSSLWATRPREPA
PREDICTED: transcription factor TGA1 [Theobroma cacao]	MNSPSTQFVHSRRMGIYEPIHQIGMWGENFKSNGNPNTSASVIVEVDTKLENESETASHEMLAPSNKYDQEATKPTDKIQ RRLAQNREAARKSRLRKKAYVQQLENSRLKLVQLEQELERARQQGLYVGGGLEGSHLGFSGAVNSGIAAFEMEYGHWMEE QNRQICELRTALNAHISDVELRILVESGMSHYFELFRMKSTASKADVFYVMSGMWKTSAERFFSWIGGFRPSELLKVLVP QLEPLTEQQFLEVCNLKQSCQQAEDALSQGMEKLQETVSATVAAGQLGEGSYIPQVATAMEKLEALVSFVNQADHLRQET LQQMSRILTTRQAARGLLALGEYFQRLRALSTLWATRPREPA
